1 **Several phased siRNA annotation methods can frequently misidentify 24 nucleotide**  
2 **siRNA-dominated *PHAS* loci**

3

4 Seth Polydore<sup>1,2</sup>, Alice Lunardon<sup>2</sup>, and Michael J. Axtell<sup>1,2\*</sup>

5 1. Genetics Ph.D. Program, Huck Institutes of the Life Sciences, The Pennsylvania State  
6 University, University Park, PA 16802 USA.

7 2. Department of Biology, The Pennsylvania State University, University Park, PA 16802 USA.

8 \* Corresponding author: [mja18@psu.edu](mailto:mja18@psu.edu)

9

10 **Abstract**

11 Small RNAs regulate key physiological functions in land plants. Small RNAs can be  
12 divided into two categories: microRNAs (miRNAs) and short interfering RNAs (siRNAs);  
13 siRNAs are further sub-divided into transposon/repetitive region-localized heterochromatic  
14 siRNAs and phased siRNAs (phasiRNAs). PhasiRNAs are produced from the miRNA-mediated  
15 cleavage of a Pol II RNA transcript; the miRNA cleavage site provides a defined starting point  
16 from which phasiRNAs are produced in a distinctly phased pattern. 21-22 nucleotide (nt)-  
17 dominated phasiRNA-producing loci (*PHAS*) are well represented in all land plants to date. In  
18 contrast, 24 nt-dominated *PHAS* loci are known to be encoded only in monocots and are  
19 generally restricted to male reproductive tissues. Currently, only one miRNA (miR2275) is  
20 known to trigger the production of these 24 nt-dominated *PHAS* loci. In this study, we use  
21 stringent methodologies in order to examine whether or not 24 nt-dominated *PHAS* loci also  
22 exist in *Arabidopsis thaliana*. We find that highly expressed heterochromatic siRNAs were

23 consistently mis-identified as 24 nt-dominated *PHAS* loci using multiple *PHAS*-detecting  
24 algorithms. We also find that *MIR2275* is not found in *A. thaliana*, and it seems to have been  
25 lost in the last common ancestor of Brassicales. Altogether, our research highlights the potential  
26 issues with widely used *PHAS*-detecting algorithms which may lead to false positives when  
27 trying to annotate new *PHAS*, especially 24 nt-dominated loci.

28

## 29 **Introduction**

30 Small RNAs regulate key physiological functions in land plants, ranging from  
31 organogenesis (Boualem et al., 2008, 2008; Kutter et al., 2007; Laufs et al., 2004; Williams et  
32 al., 2005) to gametogenesis (Grant-Downton et al., 2009). Three major protein families are  
33 involved in the biogenesis of small RNAs. The first family is the DICER-LIKE (DCL) protein  
34 family. Consisting of four paralogs in the *Arabidopsis thaliana* genome (Baulcombe, 2004;  
35 Chapman & Carrington, 2007), DCL proteins hydrolyze RNA precursors into 20-24 nt double-  
36 stranded RNA fragments (Millar & Waterhouse, 2005). These double-stranded RNA fragments  
37 are then loaded into ARGONAUTE (AGO) proteins, the second protein family, and one strand  
38 of the RNA is discarded (Ender & Meister, 2010). Upon Watson-crick binding to other RNA  
39 transcripts in the cell, the AGO/single-stranded RNA complex represses other RNA transcripts  
40 (Baumberger & Baulcombe, 2005; Qi et al., 2005). Overall, 10 AGOs are encoded in the *A.*  
41 *thaliana* genome (Tolia & Joshua-Tor, 2007). RNA DEPENDENT RNA POLYMERASES  
42 (RDRs) are the third family of proteins involved in the biogenesis of many small RNAs. RDRs  
43 convert single-stranded RNAs into double-stranded RNAs by synthesizing the complementary  
44 strand of the RNA molecule (Willmann, et al., 2011). Six *RDRs* are encoded in the *A. thaliana*  
45 genome (Willmann, et al., 2011).

46 Small RNAs can be divided into two major categories: microRNAs (miRNAs) which are  
47 precisely processed from single-stranded RNA with a hairpin-like secondary structure (Millar &  
48 Waterhouse, 2005), and short interfering RNAs (siRNAs), which are derived from double-  
49 stranded RNA precursors (Axtell, 2013). siRNAs are further divided into several different  
50 groups, including phased siRNAs (phasiRNAs) and heterochromatic siRNAs (hc-siRNAs).  
51 Predominantly 24 nts in length, hc-siRNAs function to repress transcription of deleterious  
52 genomic elements such as transposable elements or repetitive elements (Ahmed et al., 2011) and  
53 the promoters of certain genes (Baev et al., 2010) by reinforcing the presence of heterochromatin  
54 in targeted areas (Baulcombe, 2004; Sugiyama et al., 2005). Biogenesis of hc-siRNAs begins  
55 with transcription by the plant-specific, holo-enzyme DNA DEPENDENT RNA  
56 POLYMERASE IV (Pol IV) (Onodera et al., 2005). The resulting transcript is then converted  
57 into double-stranded RNA by RDR2 and this double-stranded transcript is hydrolyzed by DCL3  
58 (Matzke et al., 2009). phasiRNAs are derived from DNA DEPENDENT RNA POLYMERASE  
59 II (Pol II) transcripts that have been targeted by miRNAs (Fei et al., 2013). Upon miRNA-  
60 mediated hydrolysis, the RNA transcript is converted into double-stranded RNA by RDR6  
61 (Cuperus et al., 2010). The resulting double-stranded RNA is then cleaved into 21nt double-  
62 stranded RNA fragments by DCL4 (and less frequently DCL2) (Axtell et al., 2006).

63 21-22 nt phasiRNA-producing loci (*PHAS*) are clearly represented in all land plants that  
64 have been sequenced thus far (Fei et al., 2013; Zheng et al., 2015). However, 24 nt dominated  
65 *PHAS* loci are only currently described in rice (Song et al., 2011), maize (Zhai et al., 2015), and  
66 other non-grass monocots (Kakrana et al., 2018). Much like 21 nt-dominated *PHAS*, the  
67 biogenesis of these 24 nt-dominated *PHAS* loci begins with the Pol II-dependent transcription of  
68 a single-stranded RNA precursor which is then targeted by miR2275 and hydrolyzed. To date,

69 miR2275 is the only miRNA known to trigger the production of 24 nt-dominated phasiRNAs  
70 (Fei et al., 2013). The resulting RNA transcript is then converted into a double-stranded RNA  
71 molecule by RDR6 (Zhai et al., 2015). However, these phasiRNA precursors are then  
72 hydrolyzed by DCL5 (a DCL3 homolog sometimes called DCL3b) to produce 24 nt phasiRNAs  
73 (Fei et al., 2013).

74         Aside from the combination of their size and biogenesis patterns, 24 nt-dominated *PHAS*  
75 loci are distinct in various ways. These loci as well as their triggering miRNA, miR2275, are  
76 very specifically expressed in the tapetum during early meiosis and quickly recede in expression  
77 in other stages of male gametogenesis in rice and maize (Tamim et al., 2018). The AGO protein  
78 that loads these phasiRNAs is unknown; however, in maize, *AGO18b* expression levels match  
79 those of the 24 nt-dominated *PHAS* loci quite closely and is therefore the most likely candidate  
80 to load 24 nt phasiRNAs (Komiya et al., 2014; Zhang et al., 2015). The targets of these 24 nt  
81 phasiRNAs are unknown, but they are apparently necessary for proper male gametogenesis (Ono  
82 et al., 2018). 24 nt-dominated *PHAS* loci were also described in the non-grass monocots  
83 asparagus, lily, and daylily (Kakrana et al., 2018). These phasiRNAs are produced from  
84 processing of inverted repeat (IR) RNAs, instead of the double-stranded RNA precursors  
85 observed in rice and maize (Kakrana et al., 2018). Although the 24 nt-dominated *PHAS* loci  
86 from non-grass monocots are still expressed most greatly in male reproductive tissue, in  
87 asparagus they are also expressed in female reproductive tissue (Kakrana et al., 2018).

88         We set out to search for evidence of 24 nt-*PHAS* loci in plants besides monocots. We  
89 searched for 24 nt *PHAS* loci in the *A. thaliana* genome using small RNA-seq data. Currently,  
90 several distinct algorithms are available to calculate the “phasing” of a sRNA-producing locus  
91 (Dotto et al., 2014; Guo et al., 2015; Zheng et al., 2014). In general, these algorithms calculate

92 the number of reads that are “in-phase” against those that are “out-of-phase” in order to  
93 determine the likelihood that a particular locus truly produces phasiRNAs (Axtell, 2010).  
94 However, 24 nt-dominated siRNA loci are very numerous in angiosperms, and therefore are a  
95 potential source of false-positives during searches for *PHAS* loci. We therefore carefully  
96 examined *A. thaliana* 24 nt-dominated loci that consistently passed *PHAS*-locus detecting  
97 algorithms using multiple methods find that they are likely just heterochromatic siRNAs (hc-  
98 siRNAs). We also use two other methods to examine the presence of 24 nt-dominated *PHAS*  
99 loci in the *A. thaliana* genome. We searched for *rdr6*-dependent, 24 nt-dominated loci and found  
100 18 such loci. We also examined homology of the miR2275 which triggers 24 nt phasiRNA  
101 biogenesis in rice and maize but found that the Brassicales clade contains no potential homologs  
102 for this miRNA. Overall, our results suggest that there are no true 24 nt *PHAS* loci in *A.*  
103 *thaliana*. Furthermore, our analysis shows that existing phasing score algorithms to detect novel  
104 *PHAS* loci can lead to false positives.

105

## 106 **Results**

### 107 **miR2275 is not found in the *Brassicales* clade**

108 Currently known 24 nt dominated phasiRNA precursors are known to be targeted only by  
109 a single miRNA family, miR2275 (Song et al., 2008; Zhai et al., 2015). We examined all  
110 available angiosperm genomes on Phytozome (ver 12.1) for potential homologs of *MIR2275*. In  
111 monocots, all but *Brachypodium stacei*, *Spirodela polyrhiza* and *Zostera marina* had potential  
112 miR2275 homologs (Figure 1; Figure S1). 12 eudicots had potential miR2275 homologs based  
113 on sequence similarity (Figure 1). We therefore interrogated small RNA libraries for these

114 species to see if a mature miR2275 homolog was expressed. Five eudicots had evidence of  
115 mature miR2275 accumulation (Figure 1). All of the monocots for which we obtained small  
116 RNA-seq data expressed mature miR2275, except *Musa acuminata* (Figure 1). Alignment of the  
117 *MIR2275* loci in species for which potential homologs could be identified shows strong  
118 conservation of the mature miRNA and miRNA\* sequences (Figure S2), suggesting that these  
119 loci evolved from a common ancestor. Importantly, because of the high specificity of miR2275  
120 expression in developing anthers (Tamim et al., 2018), it's possible that our analysis includes  
121 false negatives, especially in situations where no reproductive tissue small RNA libraries were  
122 available. Altogether, our data suggest that miR2275 is not found in *A. thaliana* and that this  
123 loss apparently occurred before the last common ancestor for Brassicales.

124

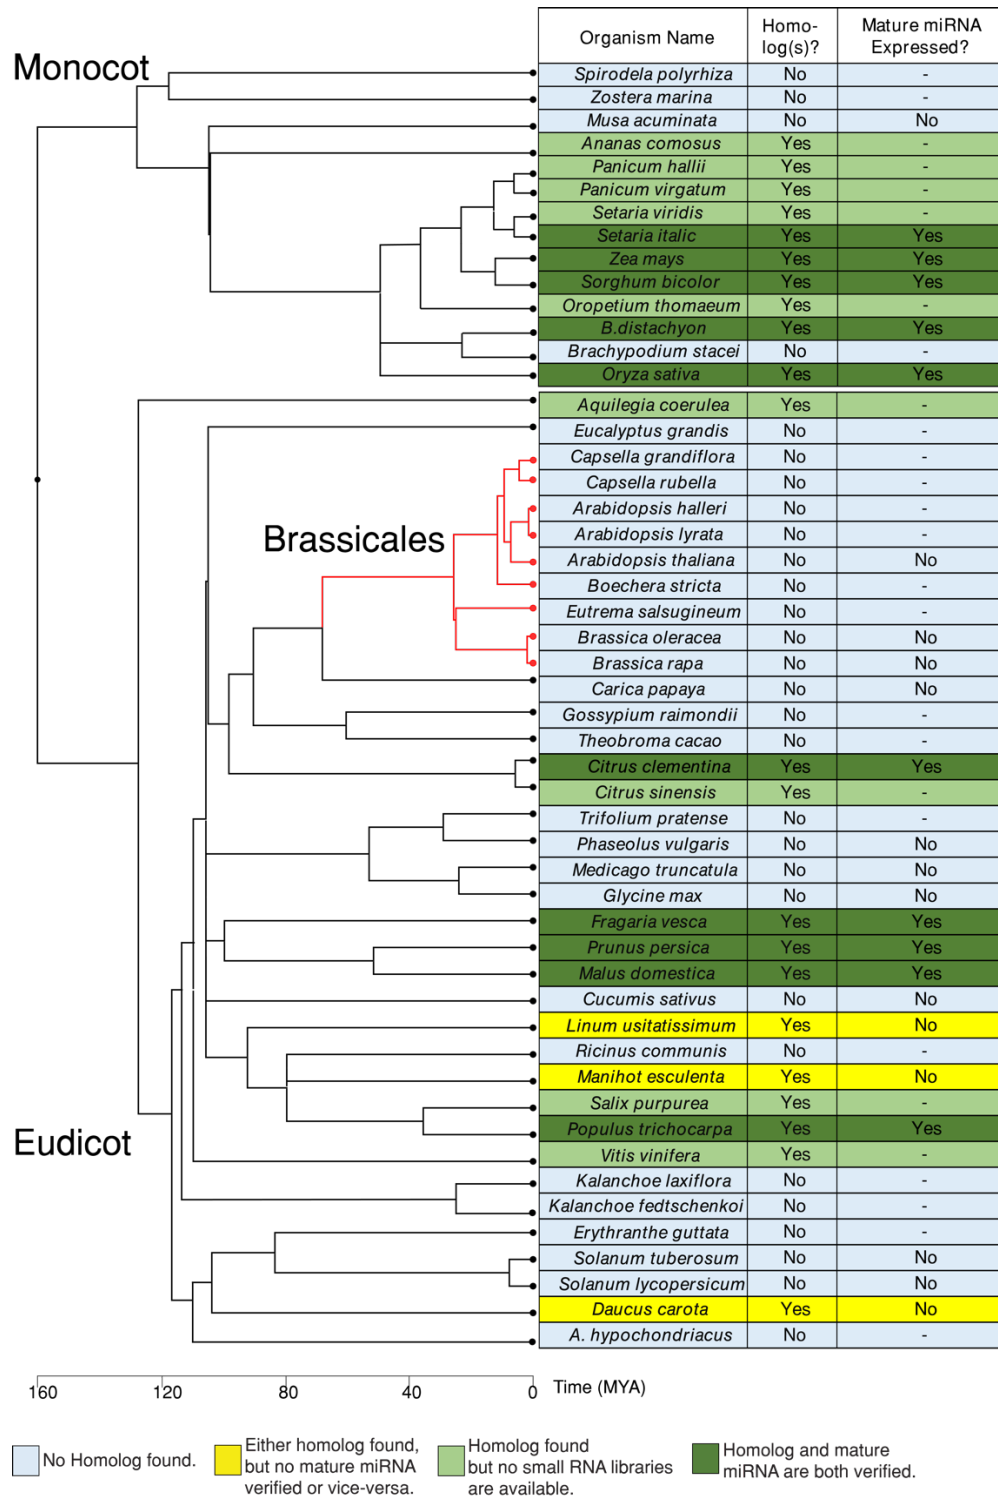

125

126 **Figure 1. Conservation of *MIR2275*.**

127 Evidence for existence of *MIR2275* homologs in angiosperms. Phylogeny depicts estimated  
 128 divergence times per TimeTree of Life (Kumar et al., 2017).

129

130 **Three *A. thaliana* hc-siRNA loci consistently pass *PHAS*-detecting algorithms**

131         Although *A. thaliana* lacks miR2275, it's possible that 24 nt *PHAS* loci exist in *A.*  
132 *thaliana* and are triggered by a different small RNA. We reasoned that true 24 nt *PHAS* loci  
133 would be dependent on one or more of the well-described *A. thaliana* *RDR* genes: *RDR1*, *RDR2*,  
134 or *RDR6*. We thus examined a previously described differential expression analysis that  
135 identified *A. thaliana* small RNA loci that were down-regulated in an *rdr1/rdr2/rdr6* triple  
136 mutant (Polydore & Axtell, 2018). The phase scores of *rdr1/rdr2/rdr6*-dependent, 24 nt-  
137 dominated loci were calculated in eight independent small RNA libraries using three different  
138 algorithms (Figure 2a). Reasonable cut-offs for *PHAS* loci detection were determined by  
139 examining the phase score distributions in the three merged wild-type libraries when well-known  
140 21 nt *PHAS* loci were analyzed (Figure S3). These cutoffs were consistent when a larger number  
141 of sRNA-seq libraries were examined (Figure S4). Of the 31,750 loci examined, only three  
142 (Figure S5; Dataset S1) passed the *PHAS* loci algorithms consistently in all 8 libraries examined  
143 (Figure 2a).

144         We were interested in determining why these three loci consistently pass the *PHAS*-  
145 detection algorithms. As phasiRNA precursors are known to be targeted by miRNAs, we  
146 predicted whether or not any known *A. thaliana* miRNAs could target these three loci. We were  
147 unable to find any obvious miRNA target sites at these loci. Although miRNA target sites were  
148 not apparent at these loci, it's entirely possible that other siRNAs might target them and initiate  
149 siRNA phasing. We therefore attempted to determine the most common phase register at each of  
150 these loci in the 8 different wild-type libraries (Figure S6). If these loci are truly phased, then we  
151 would expect the same phase register to predominate in each library examined. While this was  
152 the case for *TAS2* (a positive control), none of the three 24 nt loci passing the *PHAS*-detection



153 algorithms had consistent phase registers (Figure S6). We also note that these three loci didn't  
 154 have the majority of their mapped reads falling into a single phase register in any of the libraries  
 155 examined, as one would expect for a true *PHAS* locus (Figure S6).  
 156

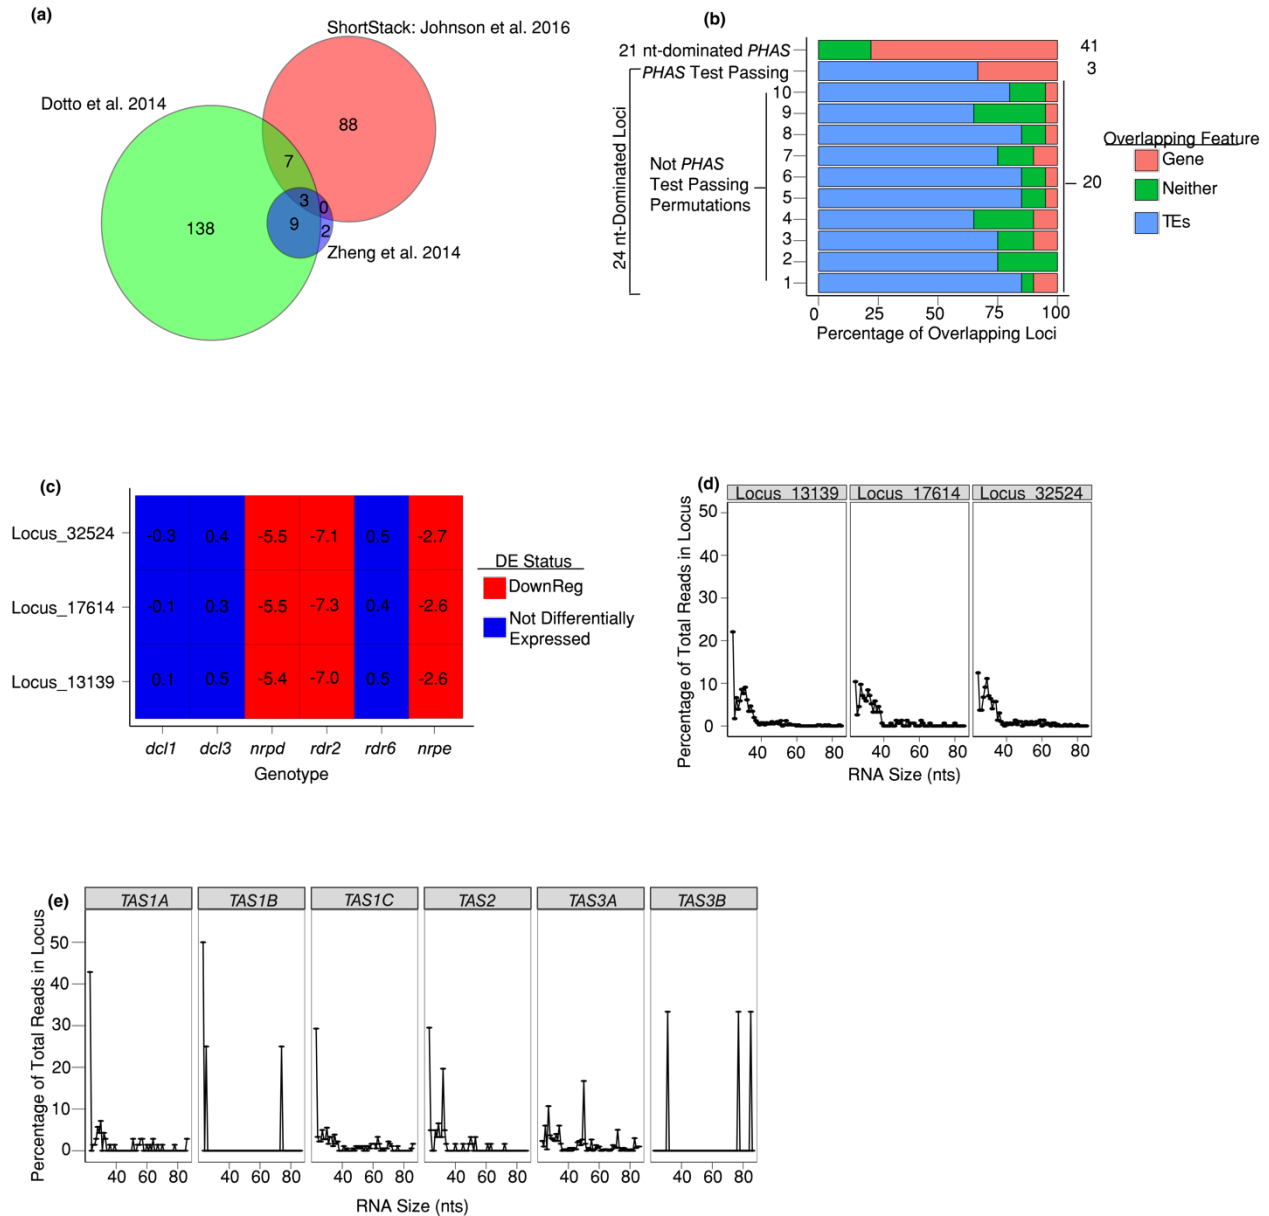

157

158

159 **Figure 2. Properties of three *A. thaliana* 24 nt-dominated small RNA loci that were called**  
160 **'phased' by three different methods.**

161 (a) Venn diagram shows numbers of 24 nt-dominated loci that were called 'phased' by the  
162 indicated algorithms.

163 (b) Percentage of the three *PHAS*-test passing loci overlapping either genes or transposable  
164 elements. The percentage is calculated as: (number of loci intersecting a feature/total number of  
165 loci in category)\*100. The total number of loci in each category is given on the right. For 24 nt  
166 not-*PHAS* loci, ten randomly selected cohorts of 20 loci each are shown.

167 (c) Accumulation of the three *PHAS*-test passing loci in different genetic backgrounds. Numbers  
168 represent the ratio of small RNA accumulation in the indicated genotypes over that in  
169 corresponding wild-type library as computed by DESeq2. The differential expression status was  
170 determined via DESeq2 at an FDR of 0.1.

171 (d) Percentage of short RNAs from *dcl2/dcl3/dcl4* triple mutant libraries by read length for the  
172 three *PHAS*-test passing loci.

173 (e) Same as in Panel d, except for five known *A. thaliana* *TAS* loci.

174

175 We then determined where in the genome these loci were encoded. Similar to hc-siRNA  
176 loci, these three loci primarily overlap with repeat- and transposable-elements (Figure 2b). In  
177 comparison, many known *A. thaliana* *PHAS* loci are primarily derived from genes (Figure 2b).  
178 Rice and maize annotated 24 nt *PHAS* loci are derived from long non-coding RNAs that are  
179 encoded in regions of the genome that are devoid of protein-coding genes, transposable  
180 elements, or repeats (Song et al., 2008; Zhai et al., 2015). We also note that sRNA accumulation  
181 from these three loci is down-regulated in *nRPD1-3* (NRPD is the largest sub-unit of Pol IV), *nrpe*  
182 (NRPE is the largest subunit of Pol V), and *rdr2* (Figure 2c). hc-siRNAs have the same genetic  
183 requirements (Matzke et al., 2009), which strongly suggests that these three loci produce hc-  
184 siRNAs. Notably, these loci are not down-regulated in *dcl3* backgrounds. This is in line with  
185 past data that show that DCL4 and DCL2 can partially complement production of hc-siRNAs in  
186 *dcl3* backgrounds (Gascioli et al., 2005).

187           The Pol IV transcripts from which hc-siRNAs are derived are around 26-50 nts in length,  
188   and accumulate to detectable levels in the *dcl2-1/3-1/4-2t* (*dcl234*) triple mutant (Ye et al., 2016;  
189   Zhai et al., 2015). We therefore analyzed the lengths of reads mapping to our three putative 24  
190   nt *PHAS* loci in *dcl234* triple mutants. We found most reads were less than 40 nts long,  
191   indicating that these putative 24 nt *PHAS* loci are associated with short precursors similar to hc-  
192   siRNA loci (Figure 2d). In comparison, reads mapping to the known *TAS* loci had a wider range  
193   of sizes, ranging from 24-80 nts (Figure 2e). Overall, the size profile of the precursor RNAs  
194   further delineate these three loci from known *PHAS* loci.

195           Finally, we examined the AGO-enrichments of small RNAs from these loci. Canonical  
196   hc-siRNAs are loaded into AGO4 in order to repress other loci transcriptionally (Mi et al., 2008).  
197   While sRNAs from our three putative 24 nt *PHAS* loci are not particularly enriched in AGO4-  
198   immunoprecipitation libraries, known 21 nt *PHAS* loci are quite depleted in the same dataset  
199   (Figure S7). We also note that sRNAs from the three putative 24 nt *PHAS* loci are depleted in  
200   AGO1 immunoprecipitation libraries (Figure S7), probably owing to the lack of 21 nt sRNAs,  
201   which AGO1 primarily loads, produced at these loci (Mi et al., 2008).

202

### 203   **The three *PHAS*-Test passing loci have distinct characteristics**

204           hc-siRNAs are known to produce small RNAs in a very imprecise manner, unlike the  
205   largely precise processing of phasiRNAs (Axtell, 2013). We were interested in how three hc-  
206   siRNAs could consistently pass three different *PHAS*-detecting algorithms. One simple  
207   explanation is possible erroneous placement of ambiguously mapped reads. These multi-  
208   mapping reads could cause the *PHAS*-detecting algorithms to overestimate the number of “in  
209   phase” reads. We therefore determined the proportion of multi-mapping reads in each locus, but

210 these loci have low proportion of multi-mapping reads compared to other 24 nt-dominated loci  
211 (Figure 3a). We note that these three loci are more highly expressed than most other 24 nt-  
212 dominated loci and even known *PHAS* loci in *A. thaliana* (Figure 3b). These three loci  
213 accumulate to nearly 1,000 RPM, while most other 24 nt-dominated loci and known *PHAS* loci  
214 only produce around 1 RPM (Figure 3b). Another interesting feature of these loci is their length.  
215 All three of these loci are around 10,000 nts in length, far greater than the 200-800 nt length of  
216 canonical *PHAS* loci and most other 24 nt-dominated loci (Figure 3c). These results indicate that  
217 these loci are simply highly expressed and particularly long hc-siRNA producing loci (Figure  
218 S3).

219

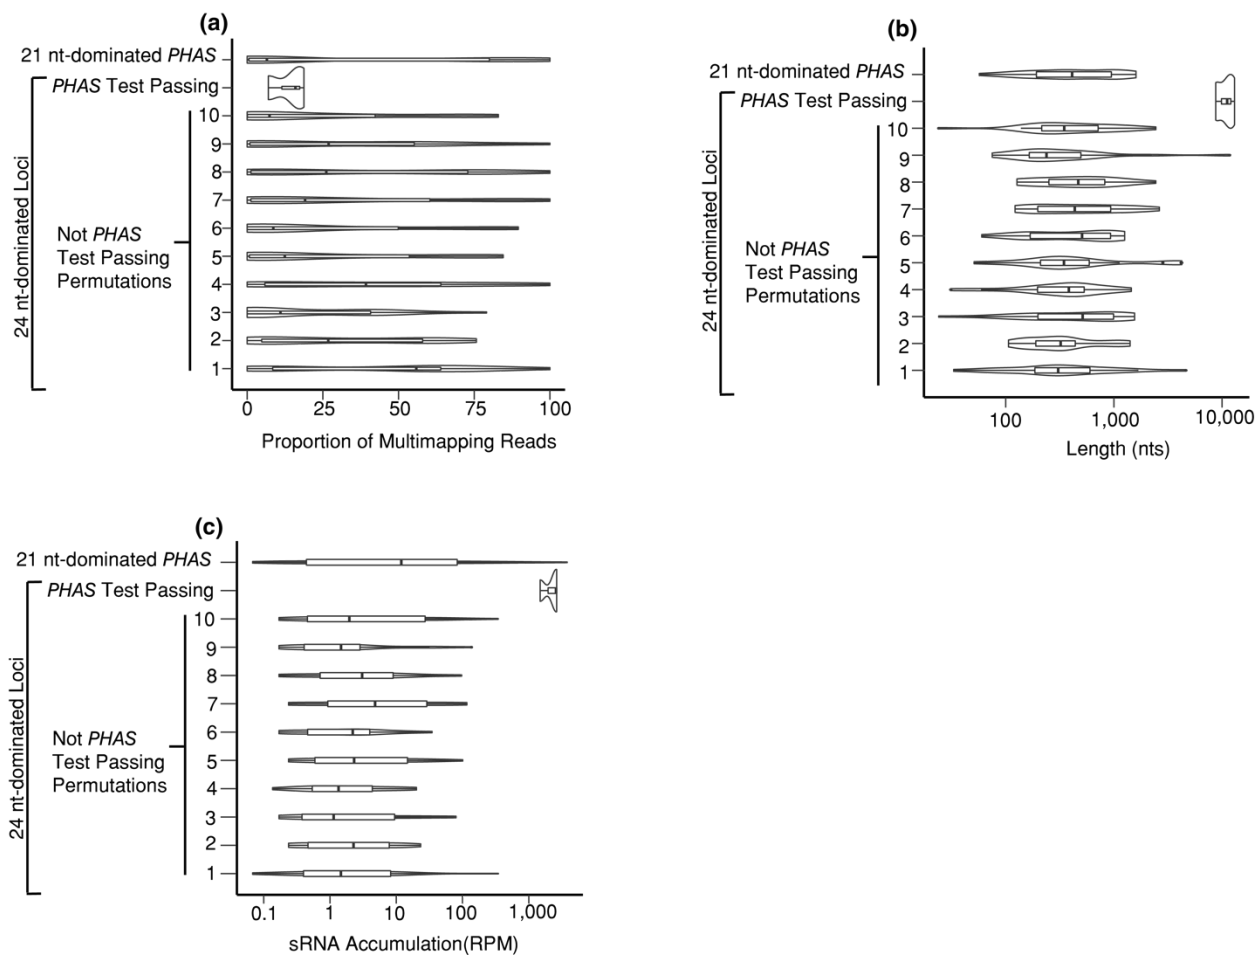

220

221

222 **Figure 3. The three *PHAS*-Test passing small RNA loci have distinct properties compared**  
223 **to other 24 nt-dominated Loci.**

224 (a) The proportion of multi-mapped reads in three different types of small RNA loci. For 24 nt-  
225 dominated loci that were not called *PHAS* loci, ten cohorts comprising 20 randomly selected loci  
226 were used as controls. The width of the density plot shows the frequency. The inset boxes show  
227 medians (horizontal lines), the 1st-3rd quartile range (boxes), the 95% confidence of medians  
228 (notches), other data out to 1.5 times the interquartile range (whiskers) and outliers (dots).

229 (b) Same as panel a except showing small RNA accumulation.

230 (c) Same as panel a except showing small RNA locus length.

231

232 **A small number of *A. thaliana rdr6*-dependent, 24 nt-dominated siRNA loci exist, but are**  
233 **not phased**

234 Canonical monocot 24 nt-dominated *PHAS* loci are produced in part through the  
235 biochemical activity of RDR6 (Zhai et al., 2015). We therefore used an alternative strategy to  
236 identify possible 24 nt *PHAS* loci by first identifying *rdr6*-dependent, 24 nt-dominated siRNA  
237 loci. We found 18 such loci (Figure S8; Dataset S1). None of these loci were consistently  
238 phased in the eight wild-type, inflorescence *A. thaliana* libraries (Table S2) tested according to  
239 any of the three algorithms we used (Dataset S3). We determined the genetic dependencies of  
240 these loci and found that these loci are down-regulated in *nripd*, *nrpe*, and *rdr2* backgrounds  
241 (Figure 4). Furthermore, these loci either overlap transposable elements or are mostly found in  
242 otherwise intergenic regions (Figure S9a). As these are typical features of hc-siRNAs, it's  
243 possible that hc-siRNAs simply erroneously placed at these loci. Again, we examined the  
244 proportion of ambiguously mapped reads in these *rdr6*-dependent, 24 nt-dominated loci  
245 compared to other 24 nt-dominated loci and found that these loci had low proportions of multi-  
246 mapping reads (Figure S9b). Our result argues against this hypothesis.

247 *rdr6*-dependent, 24 nt-dominated loci are strongly expressed relative to other 24 nt-  
248 dominated loci (Figure S9c). These *rdr6*-dependent loci have median expression level of nearly  
249 100 RPM compared to the nearly 1 RPM median expression level of the other 24 nt-dominated  
250 loci (Figure S9c). This result is similar to the three *A. thaliana* loci that passed our *PHAS*-  
251 detection algorithms (Figure 3b). However, the lengths of the *rdr6*-dependent, 24 nt-dominated  
252 loci are similar to other 24 nt-dominated loci (Figure S9d). Overall while do find evidence for a  
253 small number of *rdr6*-dependent, 24 nt dominated siRNAs in *A. thaliana*, they are not phased,  
254 nor do they appear readily discernable from more typical hc-siRNA loci. Thus we find no  
255 evidence of 24 nt dominated *PHAS* loci in *A. thaliana*.

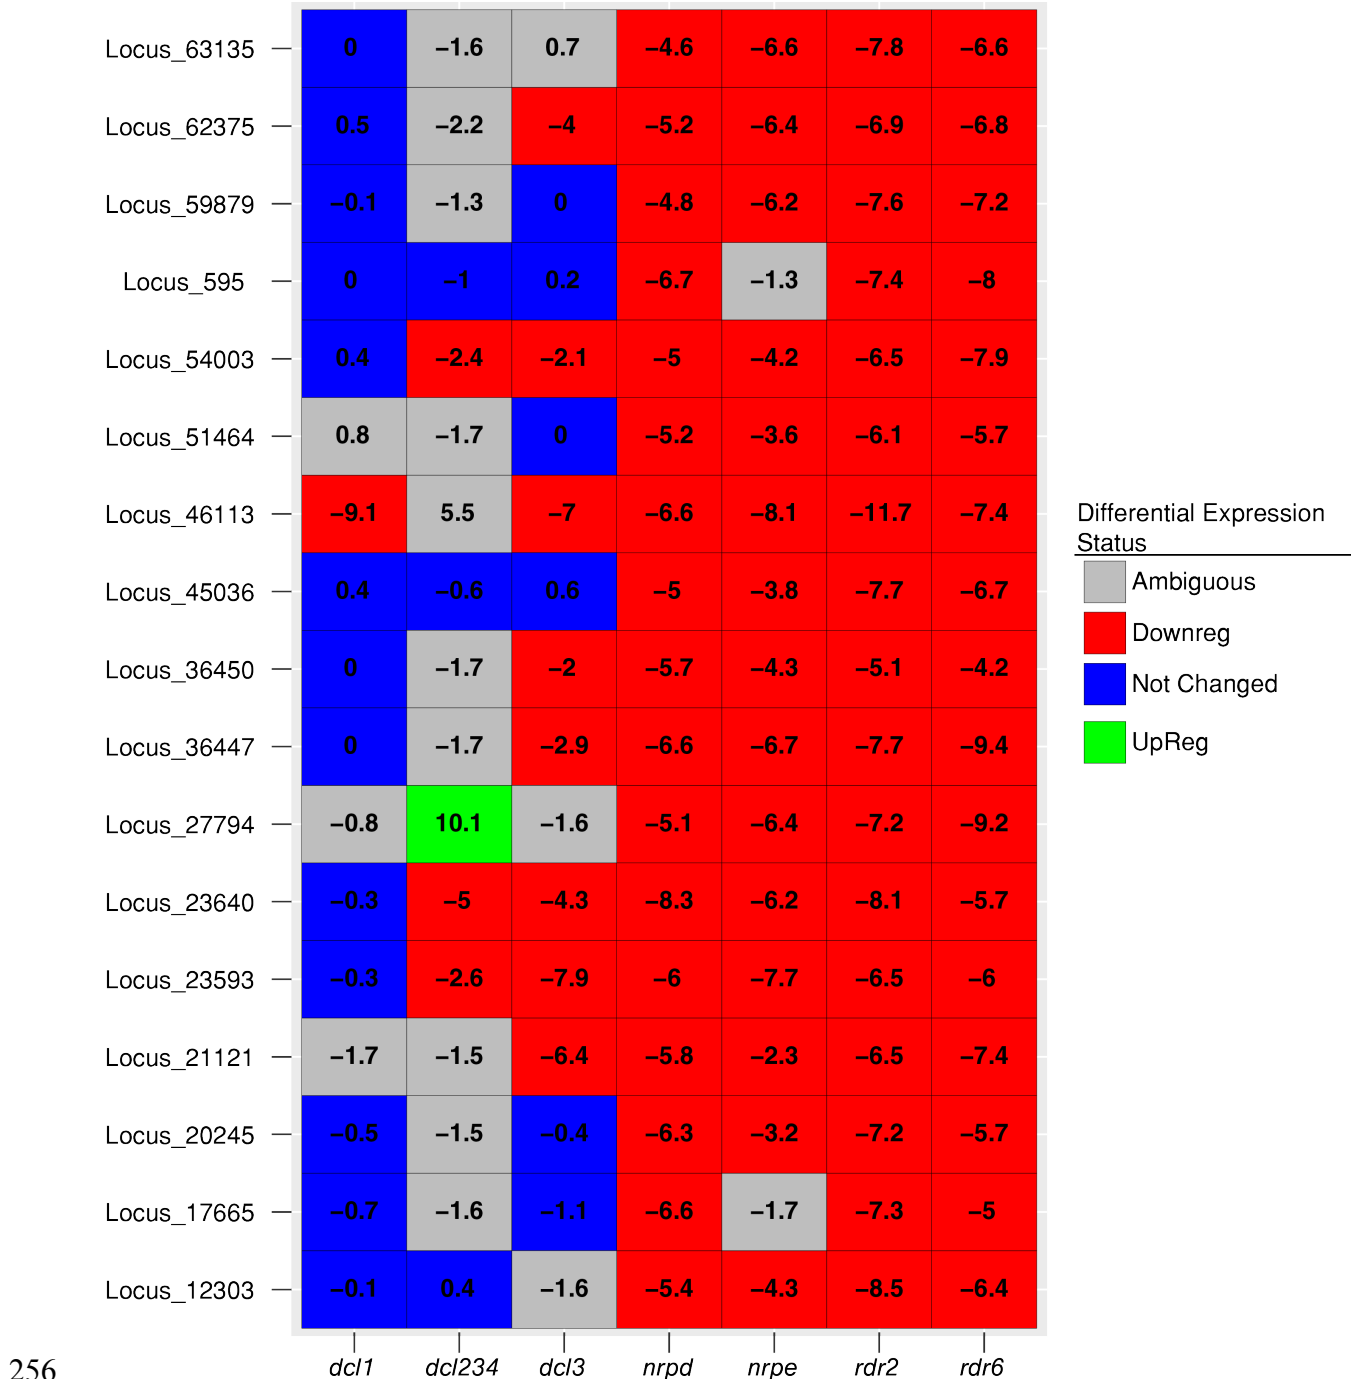

256

257 **Figure 4. Accumulation of 24 nt-dominated, *rdr6*-dependent small RNA loci in different**  
 258 **mutant backgrounds.**

259 Numbers represent the log<sub>2</sub>-transformed ratios of small RNA accumulation in the indicated  
 260 genotypes over that in corresponding wild-type library as computed by DESeq2. The differential  
 261 expression status was determined via DESeq2 at an FDR of 0.1.

262

## 263 **Erroneous detection of 24nt-domination *PHAS* loci occurs in other land plant species**

264 We were interested in determining if erroneous annotation of *PHAS* loci was unique to *A.*  
265 *thaliana* small RNAs or if these results could be replicated in other species. We therefore  
266 interrogated publicly available *Brassica rapa*, *Cucumis sativus*, *Phaseolus vulgaris*, and *Solanum*  
267 *tuberosum* small RNA libraries (all eudicots) using the three algorithms, searching for putative  
268 24 nt-dominated *PHAS* loci. We specifically chose these four species because they all lacked a  
269 potential *MIR2275* homolog (Figure 1). As *miR2275* is the only miRNA known to trigger 24 nt-  
270 dominated phasiRNAs, any 24 nt-dominated loci called as *PHAS* loci in these species are likely  
271 false positives. Each species had 24 nt-dominated small RNAs that were misannotated as *PHAS*  
272 loci (Figure S10). We first determined where in the genome the 24 nt-dominated loci are  
273 encoded. Like in *A. thaliana*, 24 nt-dominated loci that passed the *PHAS*-detection algorithm  
274 seem to come predominantly from transposable elements. This was true in all the species  
275 examined except for *P. vulgaris* (Figure 5a). Curiously, the *PHAS*-test passing loci had a slightly  
276 higher proportion of ambiguously mapped reads compared to other 24 nt-dominated loci in *B.*  
277 *rapa*, *P. vulgaris*, and *S. tuberosum* (Figure 5b). For *C. sativus*, the proportion of multi-mapping  
278 reads in *PHAS*-test passing 24 nt-dominated loci was substantially higher than other 24 nt-  
279 dominated loci (Figure 5b). It's still unlikely that multi-mapping reads contribute significantly to  
280 phasing at these loci as the proportion of ambiguously mapped to both types of 24 nt-dominated  
281 loci are similar in three of the four species tested (Figure 5b).

282 In the four species tested, the *PHAS*-test passing 24 nt-dominated loci had both  
283 significantly greater lengths (Figure 5c) and expression on average (Figure 5d). We observed  
284 this same trend in *A. thaliana* (Figure 3b-c), which suggests that long lengths and high



285 expression levels of 24 nt-dominated loci are conducive to *PHAS* loci mis-annotations, even in  
 286 other distantly related species.

287

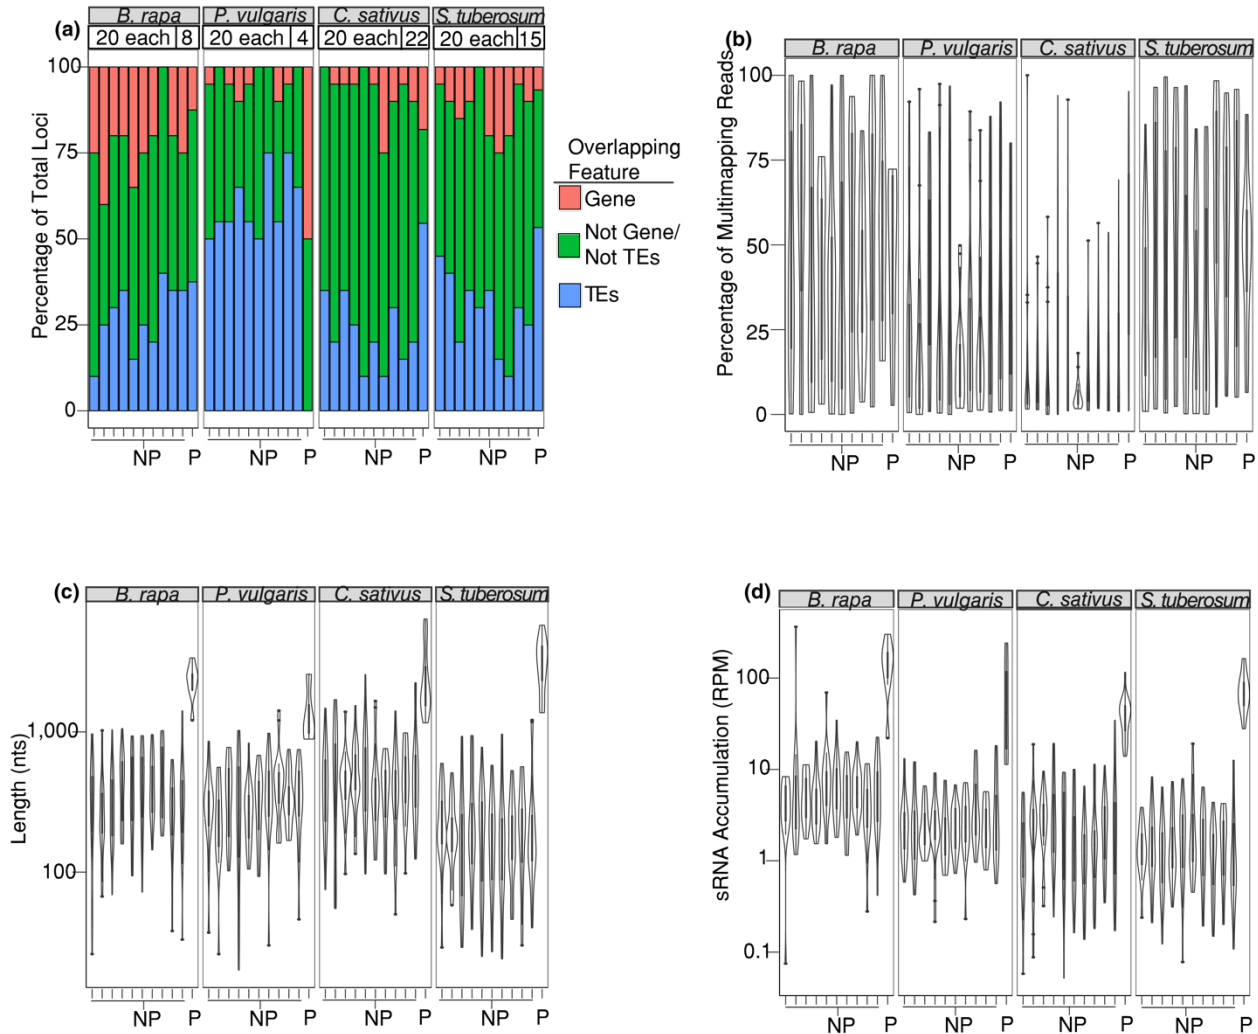

288

289

290 **Figure 5. Four divergent species also contain 24 nt-dominated loci that passed the three**  
 291 ***PHAS*-detecting algorithms.**

292 (a) Percentage of 24 nt-dominated Loci overlapping genes, transposable elements, or neither.  
 293 The species name is shown in the top grey boxes. P: *PHAS*-test passing locus; NP: Not *PHAS*-  
 294 test passing locus. For NP loci, ten cohorts of 20 randomly selected loci each were used as  
 295 negative controls. The number of loci in each category is shown above the bar graphs.

296 (b) Same as panel a except showing the proportion of multi-mapping reads.

297 (c) Same as panel a except showing length of the small RNA locus.

298 (d) Same as panel a except showing small RNA accumulation.

299

## 300 **Discussion**

### 301 ***rdr6*-dependent, 24 nt-dominated loci in the *A. thaliana* genome**

302 We found a handful of *rdr6*-dependent, 24 nt-dominated loci to be encoded in the *A.*  
303 *thaliana* genome. However, these loci have the same genetic dependencies as hc-siRNAs  
304 (Figure 4) and are frequently derived from the transposable elements (Figure S9a). The only  
305 other known *rdr6*-dependent, transposon-overlapping small RNA loci encoded in *A. thaliana* are  
306 epigenetically activated short interfering RNAs (easiRNAs) (Creasey et al., 2014). easiRNAs  
307 are derived from transcriptionally active transposable elements that are hypothesized to be  
308 targeted and cleaved by miRNAs (Creasey et al., 2014). Through the biochemical actions of  
309 RDR6 and DCL4, the miRNA cleavage product is converted into 21-22 nt double-stranded RNA  
310 molecules (Creasey et al., 2014). Furthermore, these easiRNAs are thought to direct initial  
311 repression of transposons (He et al., 2015). It's possible that these *rdr6*-dependent, 24 nt-  
312 dominated loci could represent a transitory stage of hc-siRNA targeting, in which the genetic  
313 machinery of hc-siRNA are used but with a remaining initial dependency on RDR6.

314

### 315 **Possible losses of the *MIR2275*-generated phasing in eudicots**

316 We examined all Phytozome (ver 12.1)-curated angiosperm genomes (Goodstein et al.,  
317 2012) for the presence of *MIR2275* homologs. *MIR2275* shows remarkable conservation in  
318 monocots (Figure 1), showing only loss in *Musa accuminata* and *Brachypodium distachyon*.

319 This could be because these are aquatic plants with reduced morphology, and thus there is  
320 relaxed selective pressure for *MIR2275*. Another explanation is that the genome assemblies for  
321 these species could be incomplete. The lack of *MIR2275* in eudicots was more extensive (Figure  
322 1), with no plants in the Brassicales clade containing a verified *MIR2275* homolog (Figure 1).  
323 Interestingly, *Aquilegia coerulea*, a basal eudicot (Sharma & Kramer, 2014), contained a  
324 *MIR2275* homolog (Figure 1; Figure S1) suggesting that the last common ancestor for eudicots  
325 may have contained *MIR2275*, and that the lack of detected putative *MIR2275* homologs in many  
326 eudicot plant species could be due to loss of *MIR2275*.

327 We only examined whether or not a possible *MIR2275* homolog could be detected by  
328 homology, if its predicted secondary structure is conducive to *MIRNA* processing (Figure S1),  
329 and in some species whether or not the putative *MIR2275* homolog was expressed in available  
330 small RNA libraries (Figure 1). We did not, however, determine if these species produce true 24  
331 nt-dominated phasiRNAs. It's possible that the potential *MIR2275* homolog in these species is  
332 an orphaned *MIRNA* or has taken on a new function. Furthermore, although some putative  
333 *MIR2275* homologs had *MIRNA*-like predicted hairpins, we note that they contain mismatches in  
334 the stem of the secondary structure which may hinder miRNA biogenesis (Figure S1). Further  
335 research is necessary to determine if these species truly encode 24 nt-dominated *PHAS* loci.

336

### 337 **The difficulties of annotating 24 nt-dominated *PHAS* loci**

338 The discovery of 24 nt-dominated *PHAS* loci in maize (Zhai et al., 2015), rice (Song et  
339 al., 2008), asparagus, daylily, and lily (Kakrana et al., 2018) opened up the possibility that these  
340 loci exist in other species, even distantly-related eudicots. However, 24 nt-dominated hc-siRNA

341 loci are widespread in land plant genomes (Ghildiyal & Zamore, 2009). This is true even in *A.*  
342 *thaliana*, although 24 nt sRNAs are thought to repress transposable elements (Matzke et al.,  
343 2009) and only about 20-30% of the *A. thaliana* genome consists of transposon/repetitive  
344 elements (Barakat et al., 1998). In contrast, other plant genomes consist of as much as 80%  
345 transposons/repetitive elements (Springer et al., 2009). The sheer number of 24 nt-dominated  
346 sRNA loci could mean that several of them could meet various annotation criteria simply by  
347 chance; this is something we have previously noted to occur in natural antisense siRNA  
348 annotation (Polydore & Axtell, 2018).

349         The supposed 24 nt-dominated *PHAS* loci examined in this study consistently showed  
350 higher levels of expression than other 24 nt-dominated sRNA loci and derived from very long  
351 loci. This isn't particularly surprising because the accumulation of reads (in- and out-of-phase)  
352 is a factor in most *PHAS*-detection algorithms (Figure S3). However, it seems that particularly  
353 highly expressed 24 nt-dominated small RNAs are able to consistently pass *PHAS*-detection  
354 algorithms because of this. It's possible that the sheer number of reads produced at these loci  
355 means that these loci produce enough "in-phase" reads by chance to score highly in *PHAS*-  
356 detecting algorithms.

357

### 358 **Annotating 24 nt-dominated *PHAS* loci in the future**

359         Our study demonstrates that when annotating novel 24 nt-dominated *PHAS*, more than  
360 utilizing *PHAS*-detecting algorithms is necessary for robust annotation. First, examining  
361 different available mutants, especially of genes involved in small RNA biogenesis, can be critical  
362 in determining type of small RNA in question (Figure 2c). All types of phasiRNAs are known to

363 be reliant on the biochemical activity of RDR6 and Pol II (Cuperus et al., 2010; Song et al.,  
364 2008; Zhai et al., 2015). While it's entirely possible that non-canonical phasiRNAs that are  
365 reliant on RDR2 and Pol IV may be described eventually, such a study must verify with robust  
366 methodologies that the *PHAS* loci aren't false positives due to the sheer number of Pol IV/RDR2  
367 –dependent reads produced in the land plant genome.

368 We searched for *MIR2275* homologs because miR2275 is the only miRNA known to  
369 trigger 24 nt phasiRNAs. If a species lacks a *MIR2275* homolog, then one should be skeptical of  
370 any 24 nt-dominated small RNA locus that is annotated as *PHAS* locus in that specie. An  
371 organism producing a mature miR2275 small RNA homolog is not sufficient to show that 24 nt-  
372 dominated *PHAS* loci are produced in that species. One should also take care to ascertain if any  
373 24 nt-dominated small RNA locus called as *PHAS* loci also contains a miR2275 target site that is  
374 “in phase” with the phasiRNAs produced from the transcript. miR2275 is also very specifically  
375 expressed in the tapetum of male floral tissue. In asparagus, 24 nt-dominated phasiRNAs have  
376 also been shown to be expressed in female floral tissue. However, 24 nt-dominated phasiRNAs  
377 have not been demonstrated to be expressed outside of reproductive tissue as of yet. Therefore,  
378 any 24 nt-dominated *PHAS* loci annotated in libraries not produced from reproductive tissues are  
379 more likely to be mis-annotations.

380 Despite the fact that several small RNA loci in *A. thaliana* are able to consistently pass  
381 the *PHAS*-detecting algorithms in different libraries, reproducibility among distinct small RNA  
382 libraries is of utmost importance. It could also be useful to employ several different *PHAS*-test  
383 algorithms as well. In *A. thaliana*, three loci were able to consistently pass our *PHAS*-detecting  
384 algorithms (Figure S5), but the number of loci that each algorithm detected on its own was  
385 generally much higher (Figure 2a). Had we not used stringent *PHAS*-detecting methods, it

386 would've been plausible to assume we had found 24 nt-dominated *PHAS* loci in *A. thaliana*  
387 based on the number of loci that consistently pass alone. Utilizing multiple small RNA libraries  
388 should become easier to accomplish as more and more libraries in different treatments/genotypes  
389 become available for socio-economically relevant species. Certain *PHAS*-detecting programs,  
390 such as *PHASIS* (Kakrana et al., 2017), automatically evaluate potential small RNA loci in  
391 different libraries individually before merging the results of each library.

392         It's not always possible to determine the small RNA that targets the phasiRNA precursor  
393 transcript. Indeed, several reads may be predicted to target a certain transcript by chance due to  
394 the sheer number of unique reads in a small RNA library. However, due to hydrolysis of the  
395 precursor transcript following small RNA-mediated targeting, phasiRNAs have well-defined  
396 termini from which they are produced (Axtell et al., 2006; Cuperus et al., 2010). Therefore, a  
397 true *PHAS* loci should have a large proportion of its reads reproducibly falling into a particular  
398 phase register. This is what we observed with well-characterized *PHAS* locus, *TAS2*, but not  
399 with the three loci that pass our rigorous *PHAS*-annotation regime in *A. thaliana* (Figure S6).

400         As 21-22 nt-dominated *PHAS* loci are far more common in land plants, especially outside  
401 of the monocots, one can conservatively limit their discovery of new *PHAS* loci to 21-22 nt-  
402 dominated small RNAs and not employ as rigorous methodology as the ones used in this study.  
403 However, one should still employ post *PHAS*-discovery quality controls to ensure these 21-22 nt-  
404 dominated *PHAS* loci are genuine (such as determining if the predominant phase registers are  
405 reproducibly dominant at these loci (Figure S6)). 24 nt-dominated *PHAS* loci on the other hand  
406 seem to be have undergone loss in many angiosperms. However, even in the species in which  
407 they are conserved, they seem to play very specific, reproductive-associated roles as evidenced

408 by their expression patterns. Great caution should be used for annotating 24 nt-dominated *PHAS*  
409 loci in the future.

410

## 411 **Materials and Methods**

### 412 **Finding potential *MIR2275* homologs in angiosperms**

413 The Phytozome (ver 12.1)-curated angiosperm genomes sequences were downloaded.  
414 The mature *O. sativa* miR2275a sequence was downloaded from miRBase (ver 21.) (Griffiths-  
415 Jones et al., 2008) and searched against all the other genomes using Bowtie v1.0 (Langmead et  
416 al., 2009) allowing for two mismatches.

417 In order to determine the predicted secondary structures of the Bowtie results of interest,  
418 the sequences corresponding to the Bowtie result, plus 200 nucleotides upstream and  
419 downstream, was extracted from the specie's genome. The secondary structures of the  
420 sequences were predicted using the mFOLD web server (Zuker, 2003) and visually inspected to  
421 determine if the sequence formed a hairpin structure consistent with accepted norms for miRNA  
422 biogenesis (Axtell & Meyers, 2018). The sequences were aligned using ClustalX ver. 2 with  
423 default parameters (Larkin et al., 2007).

424 For those species for which publicly available small RNA-seq data existed, we  
425 downloaded, trimmed, and merged the small RNA libraries. The merged libraries were  
426 collapsed to non-redundant reads and investigated using CD-HIT (ver 4.6.8) using the options -n  
427 4, -d 0, and -g 1. The *O. sativa* miR2275a sequence was used as a query.

428

429 **Determination of potential 24 nt-dominated *PHAS* loci in different wild-type, inflorescence**  
430 **libraries**

431 Wild-type biological triplicate small RNA libraries (GSE105262) (Polydore & Axtell,  
432 2018) were merged and aligned against the *A. thaliana* (TAIR 10) genome using ShortStack (ver  
433 3.8) (Johnson et al., 2016) using 27 known *A. thaliana PHAS* loci as a query file (Table S1).  
434 Three distinct *PHAS* –detecting algorithms (Dotto et al., 2014; Johnson et al., 2016; Zheng et al.,  
435 2014) were used to determine phase scores in the merged run. These scores were used as the  
436 basis to determine cutoffs for calling significantly phased loci (Figures S3-S4). Phase scores of  
437 each known *PHAS* locus for each of the three algorithms in the eight wild-type libraries used is  
438 listed in Dataset S4. Note that we didn't use the multiple testing correction for *PHAS* loci p-  
439 values as done in Dotto et al. 2014 as we wished to test the three algorithms against each other,  
440 and the algorithms that yield phase scores couldn't be adjusted for multiple testing.

441 Wild-type and *rdr1-1/2-1/6-15* (*rdr1/2/6*) triple mutant small RNA libraries  
442 (GSE105262) (Polydore & Axtell, 2018) were aligned against the *A. thaliana* (TAIR 10) genome  
443 using ShortStack (ver 3.2) with option `-pad 75` and option `-min_cov 0.5rpm` (Table S2). With  
444 these settings, small RNA loci are found as follows: All distinct genomic intervals containing  
445 one or more primary sRNA-seq alignments within 75 nts of each other were obtained, and then  
446 filtered to remove loci where the total sRNA-seq abundance with a locus was less than 0.5 reads  
447 per million. This produced a final set of distinct, non-overlapping small RNA loci. Differential  
448 expression to determine down-regulated loci was performed as previously described (Polydore &  
449 Axtell, 2018). Down-regulated, 24 nt-dominated small RNA loci were catalogued into a list.  
450 Eight wild-type, inflorescence small RNA libraries (Table S2) were run individually against the  
451 *A. thaliana* (TAIR 10) genome utilizing ShortStack (ver 3.8.1) using the results of our wild-type



452 and *rdr1/2/6* libraries run as a query file. The phase scores of loci corresponding to the down-  
453 regulated, 24 nt-dominated small RNAs loci were evaluated using the binary sequence alignment  
454 (BAM)-formatted alignments from each run. ShortStack and an in-house Python script was used  
455 to perform the three phase score calculations. For *B. rapa*, *C. sativus*, *P. vulgaris*, and *S.*  
456 *tuberosum*, the previous Shortstack merged small RNA alignments were analyzed in the same  
457 way.

458 For the four other species besides *A. thaliana*, we downloaded publicly available small  
459 RNA libraries (Dataset S2) for *Brassica rapa*, *Cucumis sativus*, *Phaseolus vulgaris*, and  
460 *Solanum tuberosum* and merged and aligned them against their respective genomes using  
461 ShortStack (ver 3.8.1) with default options. The genomes used were ver 1.0 for *B. rapa* (Wang  
462 et al., 2011), ver 1.0 for *P. vulgaris* (Schmutz et al., 2014), ver. 2 for *C. sativus* (Huang et al.,  
463 2009), and dm\_v404 for *S. tuberosum* (Hardigan et al., 2016).

464

#### 465 **AGO Immunoprecipitation, genetic dependency, and properties of loci analyses**

466 Calculating the lengths, proportion of multi-mapping reads, small RNA expression levels  
467 (in Reads Per Million (RPM)), determining the genetic dependencies, and the AGO enrichments  
468 of various loci were performed as previously described (Polydore & Axtell, 2018). In order to  
469 compare the properties of 24 nt-dominated loci that passed the *PHAS*-detection algorithms to  
470 those that didn't, 10 subsets of 20 loci were randomly selected from the 24 nt-dominated loci that  
471 didn't pass the *PHAS*-detection algorithms with replacement.

472

#### 473 **Examining *PHAS*-test passing loci for potential miRNA targeting**

474 Sequences corresponding to the *A. thaliana* loci that consistently passed the *PHAS*-  
475 detection algorithms plus 200 base pairs up-stream and down-stream were extracted from the *A.*  
476 *thaliana* genome. Mature miRNA sequences were downloaded from miRBase (ver 21) and  
477 aligned against these sequences using the Generic Small RNA-Transcriptome Aligner. A  
478 miRNA was considered to be potentially targeting a sequence if it aligned with an Allen et. al.  
479 score of 3 or less.

480

#### 481 **Acknowledgements**

482 This research was funded by NSF Award 1339207 to MJA, the NIH Bioinformatics and  
483 Statistics (CBIOS) Predoctoral Training Program (1T32GM102057- 0A1) to SP, and the Henry  
484 W. Popp Graduate Assistantship Fund to SP.

485

#### 486 **Literature cited**

487 Ahmed, I., Sarazin, A., Bowler, C., Colot, V., & Quesneville, H. (2011). Genome-wide evidence  
488 for local DNA methylation spreading from small RNA-targeted sequences in  
489 *Arabidopsis*. *Nucleic Acids Research*, 39(16), 6919–6931.

490 <https://doi.org/10.1093/nar/gkr324>

491 Axtell, M. J. (2010). A Method to Discover Phased siRNA Loci. In *Plant MicroRNAs* (pp. 59–  
492 70). Humana Press. [https://doi.org/10.1007/978-1-60327-005-2\\_5](https://doi.org/10.1007/978-1-60327-005-2_5)

493 Axtell, M. J. (2013). Classification and Comparison of Small RNAs from Plants. *Annual Review*  
494 *of Plant Biology*, 64(1), 137–159. <https://doi.org/10.1146/annurev-arplant-050312->

495 120043

- 496 Axtell, M. J. (2015). Non-coding RNAs: The small mysteries of males. *Nature Plants*, *1*(5),  
497 15055. <https://doi.org/10.1038/nplants.2015.55>
- 498 Axtell, M. J., Jan, C., Rajagopalan, R., & Bartel, D. P. (2006). A two-hit trigger for siRNA  
499 biogenesis in plants. *Cell*, *127*(3), 565–577. <https://doi.org/10.1016/j.cell.2006.09.032>
- 500 Axtell, M. J., & Meyers, B. C. (2018). Revisiting criteria for plant miRNA annotation in the era  
501 of big data. *The Plant Cell*, tpc.00851.2017. <https://doi.org/10.1105/tpc.17.00851>
- 502 Baev, V., Naydenov, M., Apostolova, E., Ivanova, D., Doncheva, S., Minkov, I., & Yahubyan,  
503 G. (2010). Identification of RNA-dependent DNA-methylation regulated promoters in  
504 Arabidopsis. *Plant Physiology and Biochemistry: PPB*, *48*(6), 393–400.  
505 <https://doi.org/10.1016/j.plaphy.2010.03.013>
- 506 Barakat, A., Matassi, G., & Bernardi, G. (1998). Distribution of genes in the genome of  
507 Arabidopsis thaliana and its implications for the genome organization of plants.  
508 *Proceedings of the National Academy of Sciences of the United States of America*,  
509 *95*(17), 10044–10049.
- 510 Baulcombe, D. (2004). RNA silencing in plants. *Nature*, *431*(7006), 356–363.  
511 <https://doi.org/10.1038/nature02874>
- 512 Baumberger, N., & Baulcombe, D. C. (2005). Arabidopsis ARGONAUTE1 is an RNA Slicer  
513 that selectively recruits microRNAs and short interfering RNAs. *Proceedings of the*  
514 *National Academy of Sciences*, *102*(33), 11928–11933.  
515 <https://doi.org/10.1073/pnas.0505461102>
- 516 Boualem, A., Laporte, P., Jovanovic, M., Laffont, C., Plet, J., Combier, J.-P., ... Frugier, F.  
517 (2008). MicroRNA166 controls root and nodule development in *Medicago truncatula*.

- 518 *The Plant Journal: For Cell and Molecular Biology*, 54(5), 876–887.
- 519 <https://doi.org/10.1111/j.1365-313X.2008.03448.x>
- 520 Chapman, E. J., & Carrington, J. C. (2007). Specialization and evolution of endogenous small  
521 RNA pathways. *Nature Reviews Genetics*, 8(11), 884–896.
- 522 <https://doi.org/10.1038/nrg2179>
- 523 Creasey, K. M., Zhai, J., Borges, F., Van Ex, F., Regulski, M., Meyers, B. C., & Martienssen, R.  
524 A. (2014). miRNAs trigger widespread epigenetically activated siRNAs from transposons  
525 in Arabidopsis. *Nature*, 508(7496), 411–415. <https://doi.org/10.1038/nature13069>
- 526 Cuperus, J. T., Carbonell, A., Fahlgren, N., Garcia-Ruiz, H., Burke, R. T., Takeda, A., ...  
527 Carrington, J. C. (2010). Unique functionality of 22-nt miRNAs in triggering RDR6-  
528 dependent siRNA biogenesis from target transcripts in Arabidopsis. *Nature Structural &*  
529 *Molecular Biology*, 17(8), 997–1003. <https://doi.org/10.1038/nsmb.1866>
- 530 Dotto, M. C., Petsch, K. A., Aukerman, M. J., Beatty, M., Hammell, M., & Timmermans, M. C.  
531 P. (2014). Genome-Wide Analysis of leafbladeless1-Regulated and Phased Small RNAs  
532 Underscores the Importance of the TAS3 ta-siRNA Pathway to Maize Development.  
533 *PLOS Genetics*, 10(12), e1004826. <https://doi.org/10.1371/journal.pgen.1004826>
- 534 Elvira-Matelot, E., Hachet, M., Shamandi, N., Comella, P., Sáez-Vásquez, J., Zytnicki, M., &  
535 Vaucheret, H. (2016). Arabidopsis RNASE THREE LIKE2 Modulates the Expression of  
536 Protein-Coding Genes via 24-Nucleotide Small Interfering RNA-Directed DNA  
537 Methylation. *The Plant Cell Online*, 28(2), 406–425.
- 538 <https://doi.org/10.1105/tpc.15.00540>
- 539 Ender, C., & Meister, G. (2010). Argonaute proteins at a glance. *J Cell Sci*, 123(11), 1819–1823.
- 540 <https://doi.org/10.1242/jcs.055210>

- 541 Fei, Q., Xia, R., & Meyers, B. C. (2013). Phased, Secondary, Small Interfering RNAs in  
542 Posttranscriptional Regulatory Networks. *The Plant Cell Online*, 25(7), 2400–2415.  
543 <https://doi.org/10.1105/tpc.113.114652>
- 544 Gascioli, V., Mallory, A. C., Bartel, D. P., & Vaucheret, H. (2005). Partially Redundant  
545 Functions of Arabidopsis DICER-like Enzymes and a Role for DCL4 in Producing trans-  
546 Acting siRNAs. *Current Biology*, 15(16), 1494–1500.  
547 <https://doi.org/10.1016/j.cub.2005.07.024>
- 548 Ghildiyal, M., & Zamore, P. D. (2009). Small silencing RNAs: an expanding universe. *Nature*  
549 *Reviews. Genetics*, 10(2), 94–108. <https://doi.org/10.1038/nrg2504>
- 550 Goodstein, D. M., Shu, S., Howson, R., Neupane, R., Hayes, R. D., Fazo, J., ... Rokhsar, D. S.  
551 (2012). Phytozome: a comparative platform for green plant genomics. *Nucleic Acids*  
552 *Research*, 40(Database issue), D1178–D1186. <https://doi.org/10.1093/nar/gkr944>
- 553 Grant-Downton, R., Hafidh, S., Twell, D., & Dickinson, H. G. (2009). Small RNA Pathways Are  
554 Present and Functional in the Angiosperm Male Gametophyte. *Molecular Plant*, 2(3),  
555 500–512. <https://doi.org/10.1093/mp/ssp003>
- 556 Griffiths-Jones, S., Saini, H. K., van Dongen, S., & Enright, A. J. (2008). miRBase: tools for  
557 microRNA genomics. *Nucleic Acids Research*, 36(suppl\_1), D154–D158.  
558 <https://doi.org/10.1093/nar/gkm952>
- 559 Groth, M., Stroud, H., Feng, S., Greenberg, M. V. C., Vashisht, A. A., Wohlschlegel, J. A., ...  
560 Ausin, I. (2014). SNF2 chromatin remodeler-family proteins FRG1 and -2 are required  
561 for RNA-directed DNA methylation. *Proceedings of the National Academy of Sciences of*  
562 *the United States of America*, 111(49), 17666–17671.  
563 <https://doi.org/10.1073/pnas.1420515111>

- 564 Guo, Q., Qu, X., & Jin, W. (2015). PhaseTank: genome-wide computational identification of  
565 phasiRNAs and their regulatory cascades. *Bioinformatics*, *31*(2), 284–286.  
566 <https://doi.org/10.1093/bioinformatics/btu628>
- 567 Hardigan, M. A., Crisovan, E., Hamilton, J. P., Kim, J., Laimbeer, P., Leisner, C. P., ... Buell,  
568 C. R. (2016). Genome reduction uncovers a large dispensable genome and adaptive role  
569 for copy number variation in asexually propagated *Solanum tuberosum*. *The Plant Cell*,  
570 TPC2015–00538–RA. <https://doi.org/10.1105/tpc.15.00538>
- 571 He, H., Yang, T., Wu, W., & Zheng, B. (2015). Small RNAs in pollen. *Science China Life*  
572 *Sciences*, *58*(3), 246–252. <https://doi.org/10.1007/s11427-015-4800-0>
- 573 Huang, S., Li, R., Zhang, Z., Li, L., Gu, X., Fan, W., ... Li, S. (2009). The genome of the  
574 cucumber, *Cucumis sativus* L. *Nature Genetics*, *41*(12), 1275–1281.  
575 <https://doi.org/10.1038/ng.475>
- 576 Jeong, D.-H., Thatcher, S. R., Brown, R. S. H., Zhai, J., Park, S., Rymarquis, L. A., ... Green, P.  
577 J. (2013). Comprehensive Investigation of MicroRNAs Enhanced by Analysis of  
578 Sequence Variants, Expression Patterns, ARGONAUTE Loading, and Target  
579 Cleavage1[W][OA]. *Plant Physiology*, *162*(3), 1225–1245.  
580 <https://doi.org/10.1104/pp.113.219873>
- 581 Johnson, N. R., Yeoh, J. M., Coruh, C., & Axtell, M. J. (2016). Improved Placement of Multi-  
582 mapping Small RNAs. *G3: Genes, Genomes, Genetics*, *6*(7), 2103–2111.  
583 <https://doi.org/10.1534/g3.116.030452>
- 584 Kakrana, A., Li, P., Patel, P., Hammond, R., Anand, D., Mathioni, S., & Meyers, B. (2017).  
585 PHASIS: A computational suite for de novo discovery and characterization of phased,

- 586 siRNA-generating loci and their miRNA triggers. *bioRxiv*, 158832.  
587 <https://doi.org/10.1101/158832>
- 588 Kakrana, A., Mathioni, S. M., Huang, K., Hammond, R., Vandivier, L., Patel, P., ... Meyers, B.  
589 C. (2018). Plant 24-nt reproductive phasiRNAs from intramolecular duplex mRNAs in  
590 diverse monocots. *Genome Research*, gr.228163.117.  
591 <https://doi.org/10.1101/gr.228163.117>
- 592 Komiya, R., Ohyanagi, H., Niihama, M., Watanabe, T., Nakano, M., Kurata, N., & Nonomura,  
593 K.-I. (2014). Rice germline-specific Argonaute MEL1 protein binds to phasiRNAs  
594 generated from more than 700 lincRNAs. *The Plant Journal*, 78(3), 385–397.  
595 <https://doi.org/10.1111/tpj.12483>
- 596 Kumar, S., Stecher, G., Suleski, M., & Hedges, S. B. (2017). TimeTree: A Resource for  
597 Timelines, Timetrees, and Divergence Times. *Molecular Biology and Evolution*, 34(7),  
598 1812–1819. <https://doi.org/10.1093/molbev/msx116>
- 599 Kutter, C., Schöb, H., Stadler, M., Meins, F., & Si-Ammour, A. (2007). MicroRNA-Mediated  
600 Regulation of Stomatal Development in Arabidopsis. *The Plant Cell*, 19(8), 2417–2429.  
601 <https://doi.org/10.1105/tpc.107.050377>
- 602 Langmead, B., Trapnell, C., Pop, M., & Salzberg, S. L. (2009). Ultrafast and memory-efficient  
603 alignment of short DNA sequences to the human genome. *Genome Biology*, 10(3), R25.  
604 <https://doi.org/10.1186/gb-2009-10-3-r25>
- 605 Larkin, M. A., Blackshields, G., Brown, N. P., Chenna, R., McGettigan, P. A., McWilliam, H.,  
606 ... Higgins, D. G. (2007). Clustal W and Clustal X version 2.0. *Bioinformatics*, 23(21),  
607 2947–2948. <https://doi.org/10.1093/bioinformatics/btm404>

- 608 Laufs, P., Peaucelle, A., Morin, H., & Traas, J. (2004). MicroRNA regulation of the CUC genes  
609 is required for boundary size control in Arabidopsis meristems. *Development*, *131*(17),  
610 4311–4322. <https://doi.org/10.1242/dev.01320>
- 611 Lee, T., Gurazada, S. G. R., Zhai, J., Li, S., Simon, S. A., Matzke, M. A., ... Meyers, B. C.  
612 (2012). RNA polymerase V-dependent small RNAs in Arabidopsis originate from small,  
613 intergenic loci including most SINE repeats. *Epigenetics*, *7*(7), 781–795.  
614 <https://doi.org/10.4161/epi.20290>
- 615 Li, S., Vandivier, L. E., Tu, B., Gao, L., Won, S. Y., Li, S., ... Chen, X. (2014). Detection of Pol  
616 IV/RDR2-dependent transcripts at the genomic scale in Arabidopsis reveals features and  
617 regulation of siRNA biogenesis. *Genome Research*, gr.182238.114.  
618 <https://doi.org/10.1101/gr.182238.114>
- 619 Matzke, M., Kanno, T., Daxinger, L., Huettel, B., & Matzke, A. J. (2009). RNA-mediated  
620 chromatin-based silencing in plants. *Current Opinion in Cell Biology*, *21*(3), 367–376.  
621 <https://doi.org/10.1016/j.ceb.2009.01.025>
- 622 Mi, S., Cai, T., Hu, Y., Chen, Y., Hodges, E., Ni, F., ... Qi, Y. (2008). Sorting of Small RNAs  
623 into Arabidopsis Argonaute Complexes Is Directed by the 5' Terminal Nucleotide. *Cell*,  
624 *133*(1), 116–127. <https://doi.org/10.1016/j.cell.2008.02.034>
- 625 Millar, A. A., & Waterhouse, P. M. (2005). Plant and animal microRNAs: similarities and  
626 differences. *Functional & Integrative Genomics*, *5*(3), 129–135.  
627 <https://doi.org/10.1007/s10142-005-0145-2>
- 628 Ono, S., Liu, H., Tsuda, K., Fukai, E., Tanaka, K., Sasaki, T., & Nonomura, K.-I. (2018). EAT1  
629 transcription factor, a non-cell-autonomous regulator of pollen production, activates



- 630           meiotic small RNA biogenesis in rice anther tapetum. *PLOS Genetics*, *14*(2), e1007238.
- 631           <https://doi.org/10.1371/journal.pgen.1007238>
- 632   Onodera, Y., Haag, J. R., Ream, T., Nunes, P. C., Pontes, O., & Pikaard, C. S. (2005). Plant
- 633           Nuclear RNA Polymerase IV Mediates siRNA and DNA Methylation-Dependent
- 634           Heterochromatin Formation. *Cell*, *120*(5), 613–622.
- 635           <https://doi.org/10.1016/j.cell.2005.02.007>
- 636   Panda, K., Ji, L., Neumann, D. A., Daron, J., Schmitz, R. J., & Slotkin, R. K. (2016). Full-length
- 637           autonomous transposable elements are preferentially targeted by expression-dependent
- 638           forms of RNA-directed DNA methylation. *Genome Biology*, *17*, 170.
- 639           <https://doi.org/10.1186/s13059-016-1032-y>
- 640   Polydore, S., & Axtell, M. J. (2018). Analysis of RDR1/RDR2/RDR6-independent small RNAs
- 641           in *Arabidopsis thaliana* improves MIRNA annotations and reveals unexplained types of
- 642           short interfering RNA loci. *The Plant Journal: For Cell and Molecular Biology*, *94*(6),
- 643           1051–1063. <https://doi.org/10.1111/tpj.13919>
- 644   Qi, Y., Denli, A. M., & Hannon, G. J. (2005). Biochemical Specialization within *Arabidopsis*
- 645           RNA Silencing Pathways. *Molecular Cell*, *19*(3), 421–428.
- 646           <https://doi.org/10.1016/j.molcel.2005.06.014>
- 647   Schmutz, J., McClean, P. E., Mamidi, S., Wu, G. A., Cannon, S. B., Grimwood, J., ... Jackson,
- 648           S. A. (2014). A reference genome for common bean and genome-wide analysis of dual
- 649           domestications. *Nature Genetics*, *46*(7), 707–713. <https://doi.org/10.1038/ng.3008>
- 650   Sharma, B., & Kramer, E. M. (2014). THE MADS-BOX GENE FAMILY OF THE BASAL
- 651           EUDICOT AND HYBRID *AQUILEGIA COERULEA* “ORIGAMI”
- 652           (RANUNCULACEAE). *Annals of the Missouri Botanical Garden*, *99*(3), 313–322.

- 653 Song, X., Li, P., Zhai, J., Zhou, M., Ma, L., Liu, B., ... Cao, X. (2008). Roles of DCL4 and  
654 DCL3b in rice phased small RNA biogenesis. *The Plant Journal*, 69(3), 462–474.  
655 <https://doi.org/10.1111/j.1365-313X.2011.04805.x>
- 656 Springer, N. M., Ying, K., Fu, Y., Ji, T., Yeh, C.-T., Jia, Y., ... Schnable, P. S. (2009). Maize  
657 Inbreds Exhibit High Levels of Copy Number Variation (CNV) and Presence/Absence  
658 Variation (PAV) in Genome Content. *PLOS Genetics*, 5(11), e1000734.  
659 <https://doi.org/10.1371/journal.pgen.1000734>
- 660 Sugiyama, T., Cam, H., Verdel, A., Moazed, D., & Grewal, S. I. S. (2005). RNA-dependent  
661 RNA polymerase is an essential component of a self-enforcing loop coupling  
662 heterochromatin assembly to siRNA production. *Proceedings of the National Academy of  
663 Sciences of the United States of America*, 102(1), 152.  
664 <https://doi.org/10.1073/pnas.0407641102>
- 665 Tamim, S., Cai, Z., Mathioni, S., Zhai, J., Teng, C., Zhang, Q., & Meyers, B. C. (2018). Cis-  
666 directed cleavage and nonstoichiometric abundances of 21-nt reproductive phasiRNAs in  
667 grasses. *bioRxiv*, 243907. <https://doi.org/10.1101/243907>
- 668 Tolia, N. H., & Joshua-Tor, L. (2007). Slicer and the Argonautes. *Nature Chemical Biology*,  
669 3(1), 36–43. <https://doi.org/10.1038/nchembio848>
- 670 Wang, X., Wang, H., Wang, J., Sun, R., Wu, J., Liu, S., ... Zhang, Z. (2011). The genome of the  
671 mesopolyploid crop species *Brassica rapa*. *Nature Genetics*, 43(10), 1035–1039.  
672 <https://doi.org/10.1038/ng.919>
- 673 Williams, L., Grigg, S. P., Xie, M., Christensen, S., & Fletcher, J. C. (2005). Regulation of  
674 Arabidopsis shoot apical meristem and lateral organ formation by microRNA miR166g

- 675 and its AtHD-ZIP target genes. *Development*, 132(16), 3657–3668.
- 676 <https://doi.org/10.1242/dev.01942>
- 677 Willmann, M. R., Endres, M. W., Cook, R. T., & Gregory, B. D. (2011). The Functions of RNA-  
678 Dependent RNA Polymerases in Arabidopsis. *The Arabidopsis Book*, e0146.
- 679 <https://doi.org/10.1199/tab.0146>
- 680 Ye, R., Chen, Z., Lian, B., Rowley, M. J., Xia, N., Chai, J., ... Qi, Y. (2016). A Dicer-  
681 Independent Route for Biogenesis of siRNAs that Direct DNA Methylation in  
682 Arabidopsis. *Molecular Cell*, 61(2), 222–235.
- 683 <https://doi.org/10.1016/j.molcel.2015.11.015>
- 684 Zhai, J., Bischof, S., Wang, H., Feng, S., Lee, T., Teng, C., ... Jacobsen, S. E. (2015). One  
685 precursor One siRNA model for Pol IV- dependent siRNAs Biogenesis. *Cell*, 163(2),  
686 445–455. <https://doi.org/10.1016/j.cell.2015.09.032>
- 687 Zhai, J., Zhang, H., Arikiti, S., Huang, K., Nan, G.-L., Walbot, V., & Meyers, B. C. (2015).  
688 Spatiotemporally dynamic, cell-type-dependent premeiotic and meiotic phasiRNAs in  
689 maize anthers. *Proceedings of the National Academy of Sciences*, 112(10), 3146–3151.
- 690 <https://doi.org/10.1073/pnas.1418918112>
- 691 Zhang, H., Xia, R., Meyers, B. C., & Walbot, V. (2015). Evolution, functions, and mysteries of  
692 plant ARGONAUTE proteins. *Current Opinion in Plant Biology*, 27, 84–90.
- 693 <https://doi.org/10.1016/j.pbi.2015.06.011>
- 694 Zheng, Yi, Wang, Y., Wu, J., Ding, B., & Fei, Z. (2015). A dynamic evolutionary and functional  
695 landscape of plant phased small interfering RNAs. *BMC Biology*, 13.
- 696 <https://doi.org/10.1186/s12915-015-0142-4>

697 Zheng, Yun, Wang, S., & Sunkar, R. (2014). Genome-Wide Discovery and Analysis of Phased  
698 Small Interfering RNAs in Chinese Sacred Lotus. *PLoS ONE*, 9(12).

699 <https://doi.org/10.1371/journal.pone.0113790>

700 Zuker, M. (2003). Mfold web server for nucleic acid folding and hybridization prediction.

701 *Nucleic Acids Research*, 31(13), 3406–3415.

702

703

704

705

706

707

708

709

710 **Supplementary Figures**

711

## Eudicots

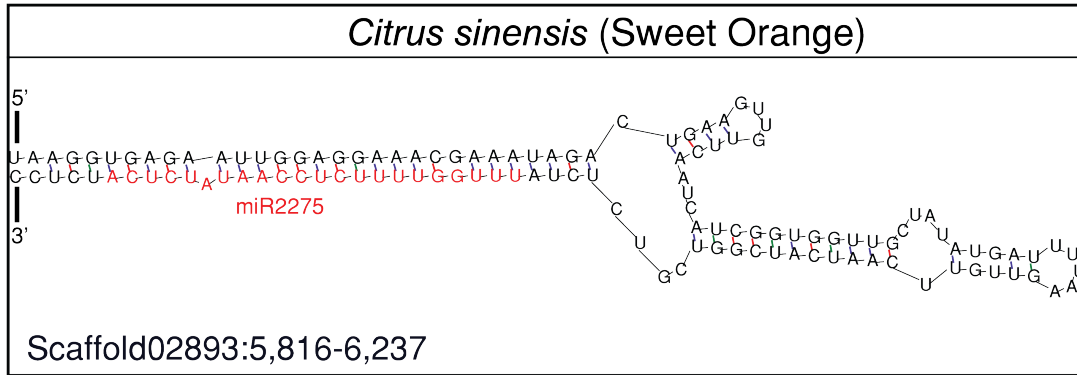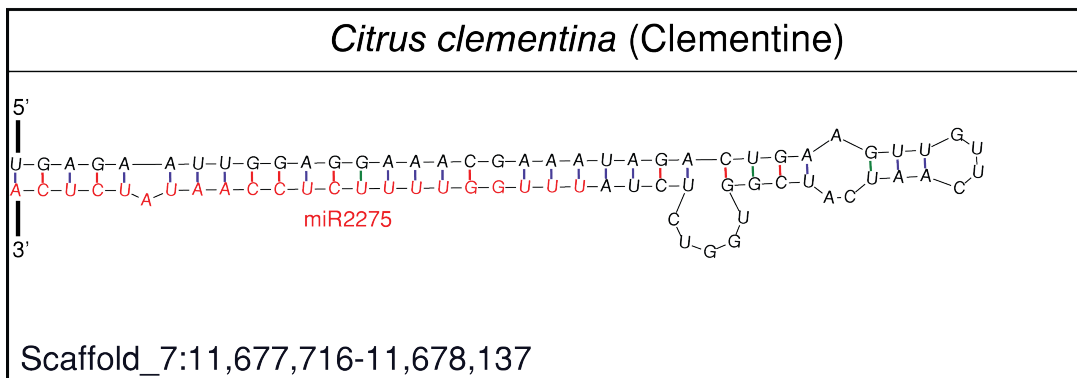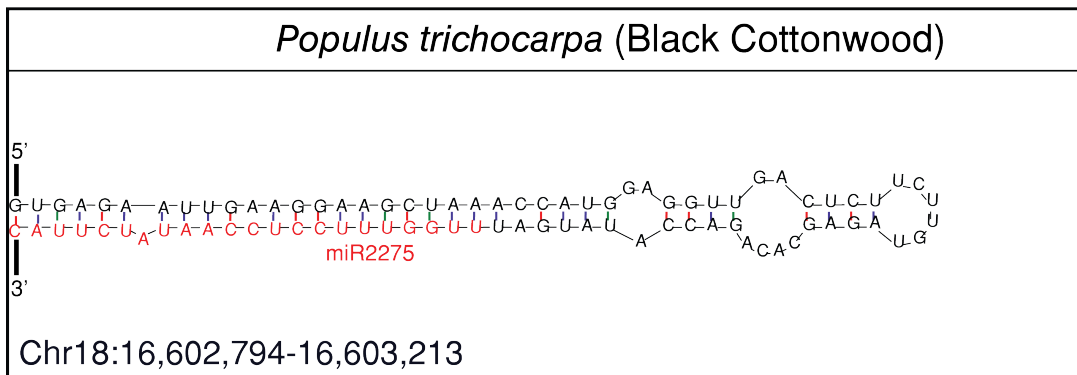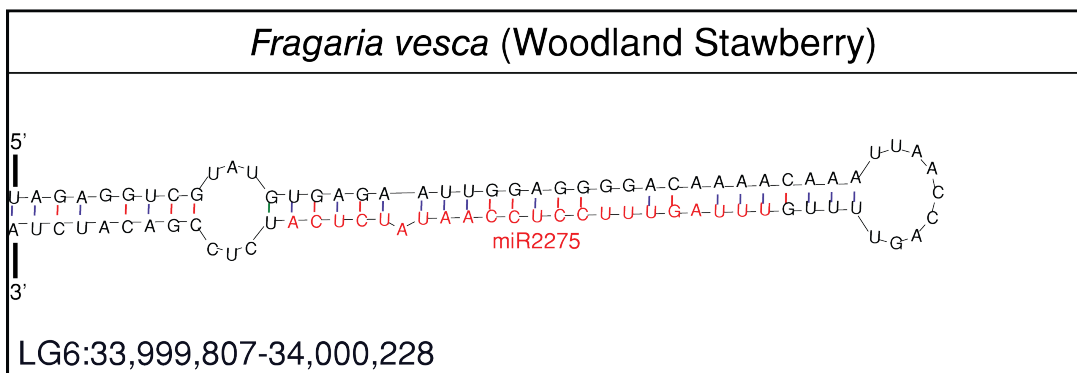

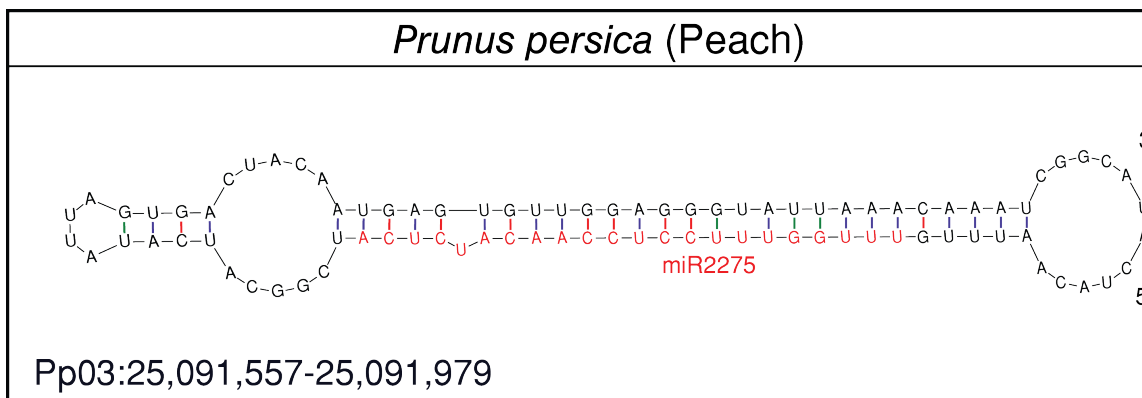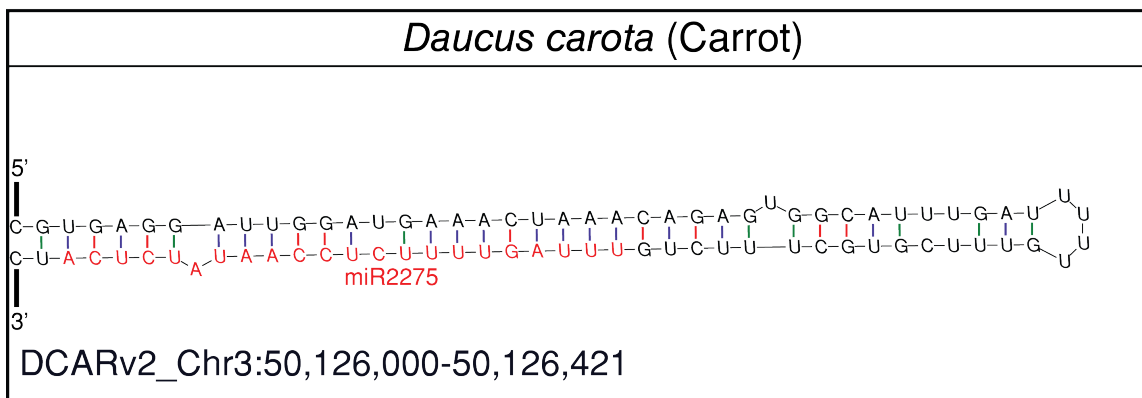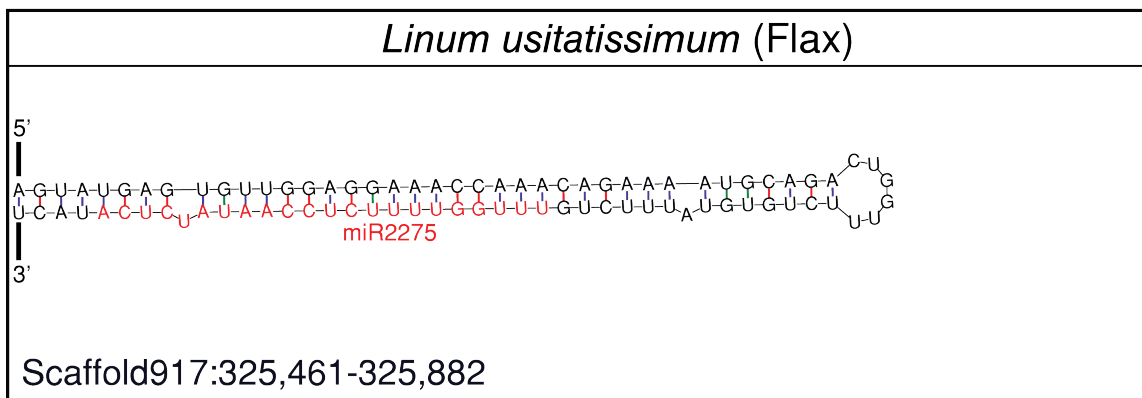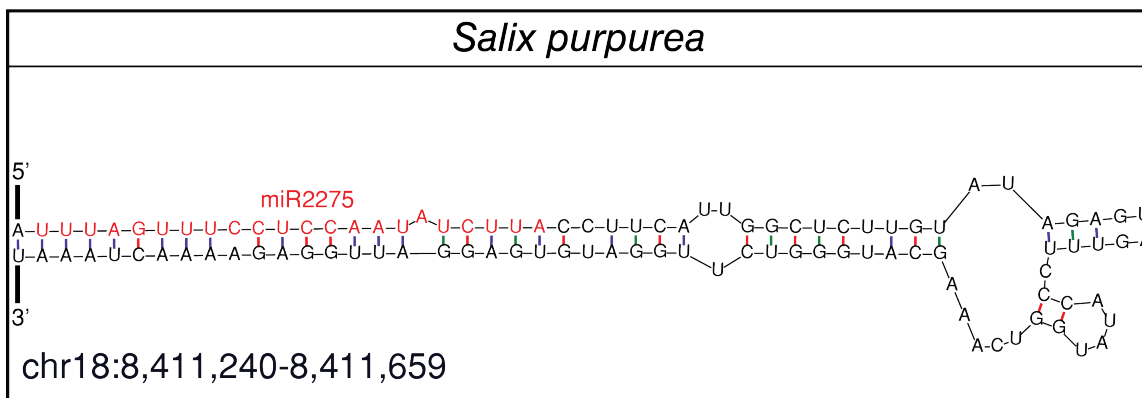



## Monocots

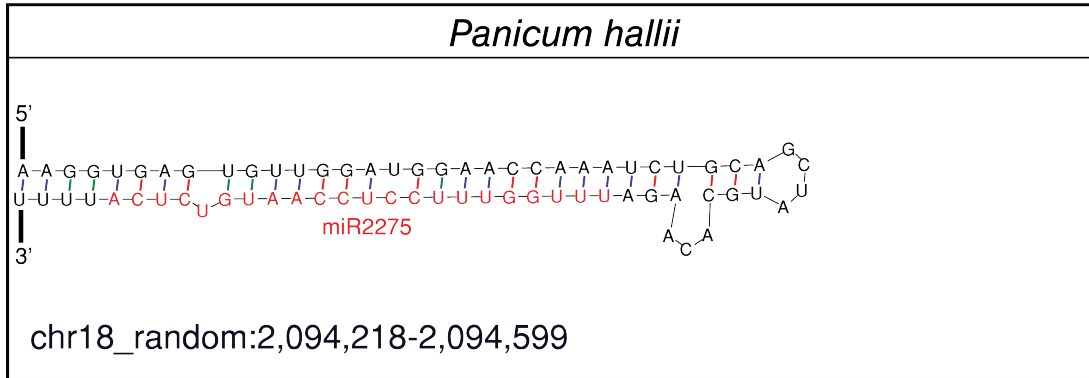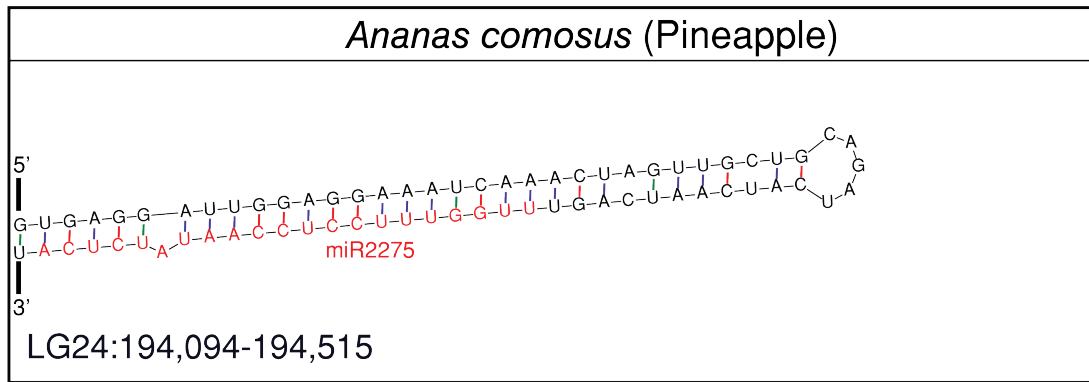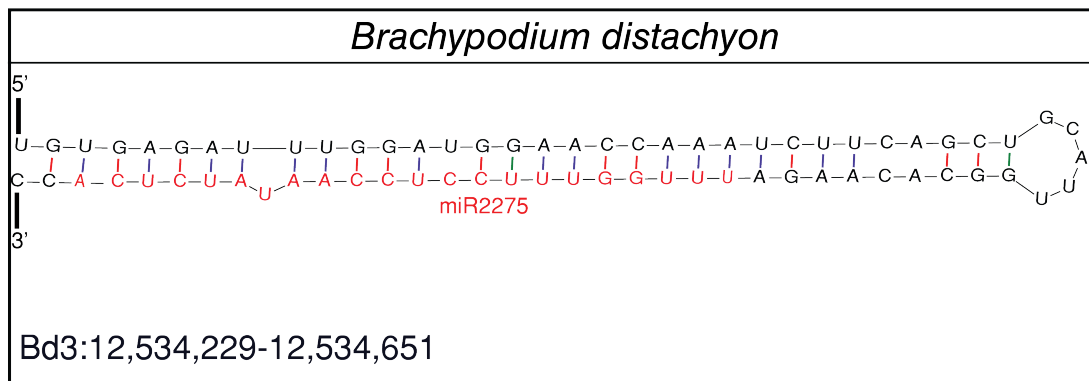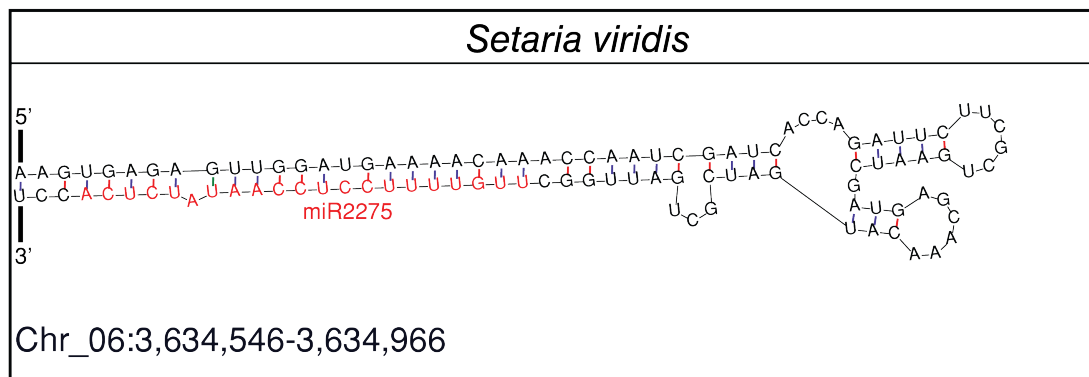



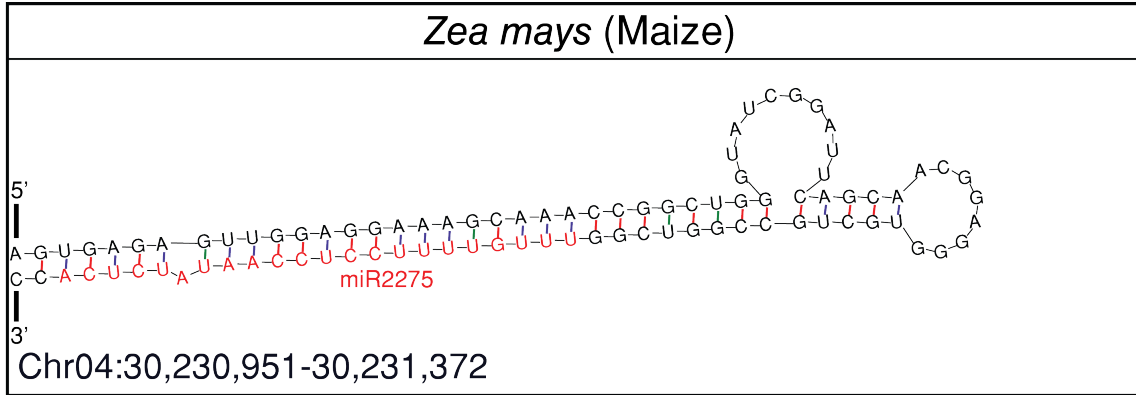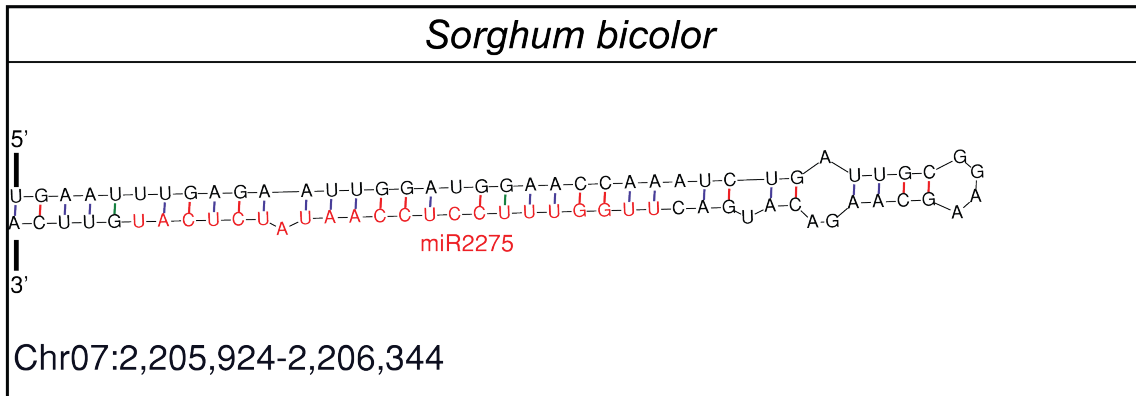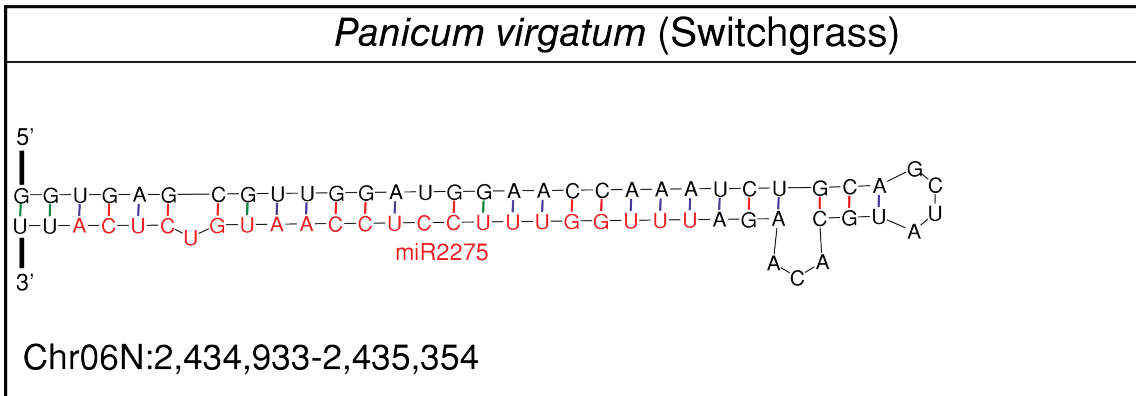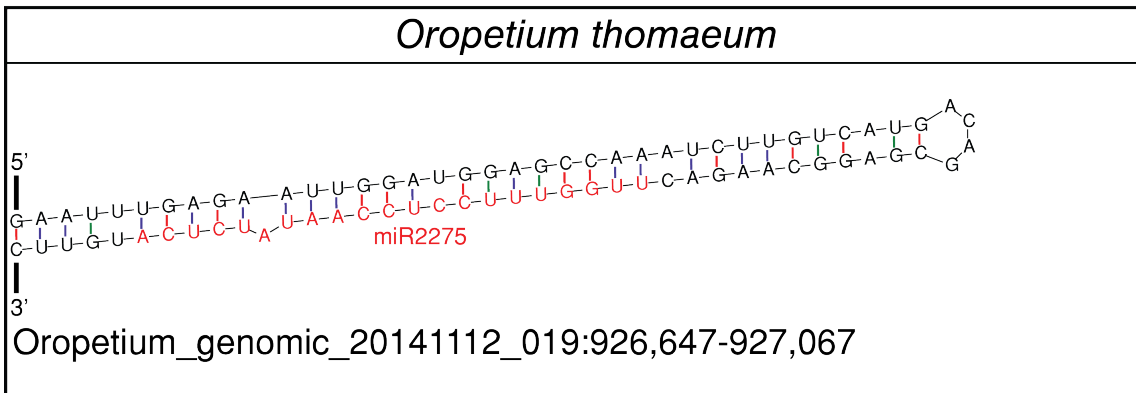

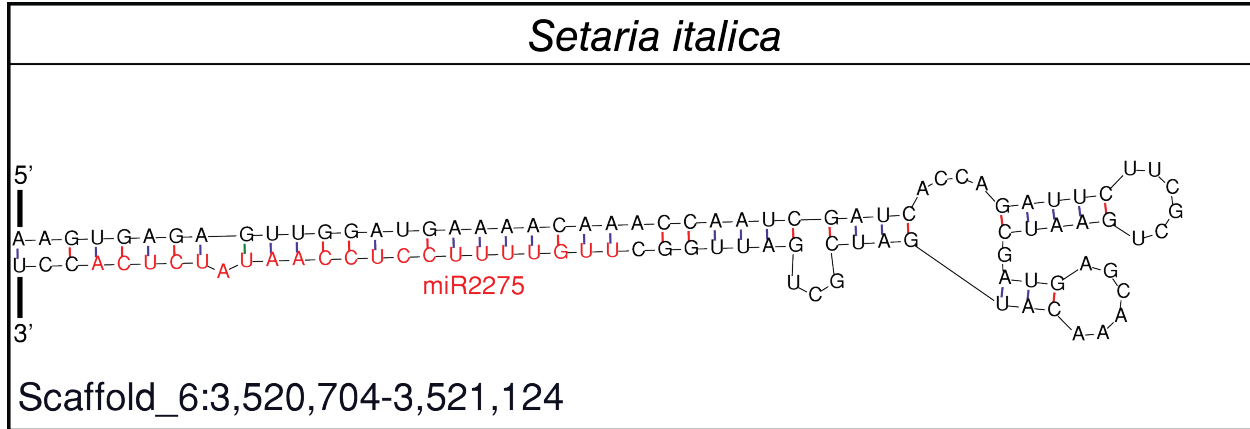

717

718

719

720 **Figure S1. The RNA secondary structure of Bowtie-validated *MIR2275* homologs.**

721 Secondary structures of loci were predicted via mFOLD. If the potential *MIR2275* homolog

722 formed a stem-and-loop structure, it is shown above. The red nucleotides denote the mature

723 *MIR2275* homolog in the secondary structure.

724



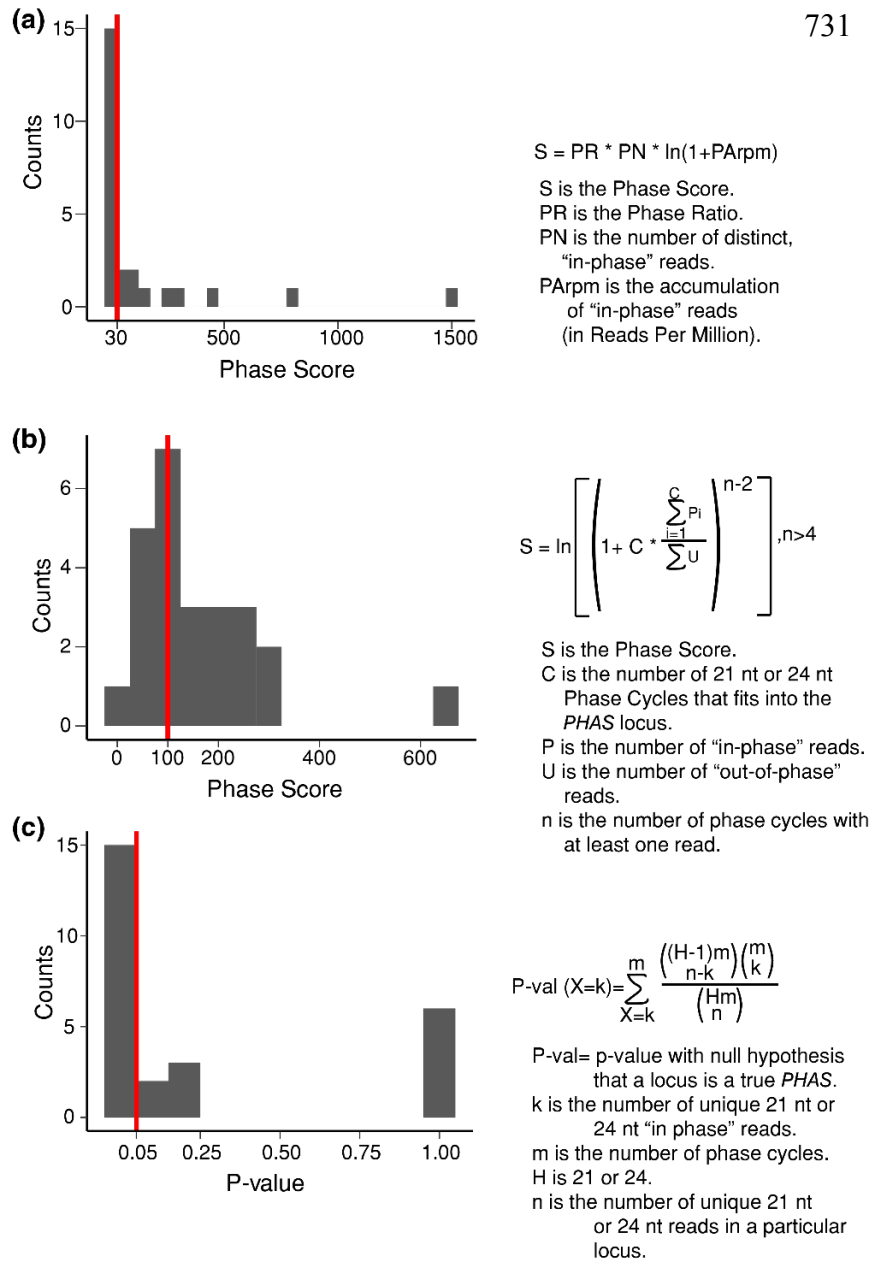

732

733 **Figure S3. Determination of phase score cutoffs using three different algorithms**

734 (a) Small RNA accumulation at 27 known 21 nt PHAS loci (Table S1) was analyzed using the  
735 PHAS-Test algorithm from Guo et al. (2015), which is used by ShortStack. Variables and  
736 formula are shown. Red line represents the cut-off used in this study to determine if a locus was  
737 phased or not; scores above the red line were considered 'phased'.

738 (b) Same as in panel a except for the PHAS-Test algorithm from Dotto et al. (2014).

739 (c) Same as in panel a except for the PHAS-Test algorithm from Zheng et al. (2014); scores  
740 below the red-line were considered 'phased'.

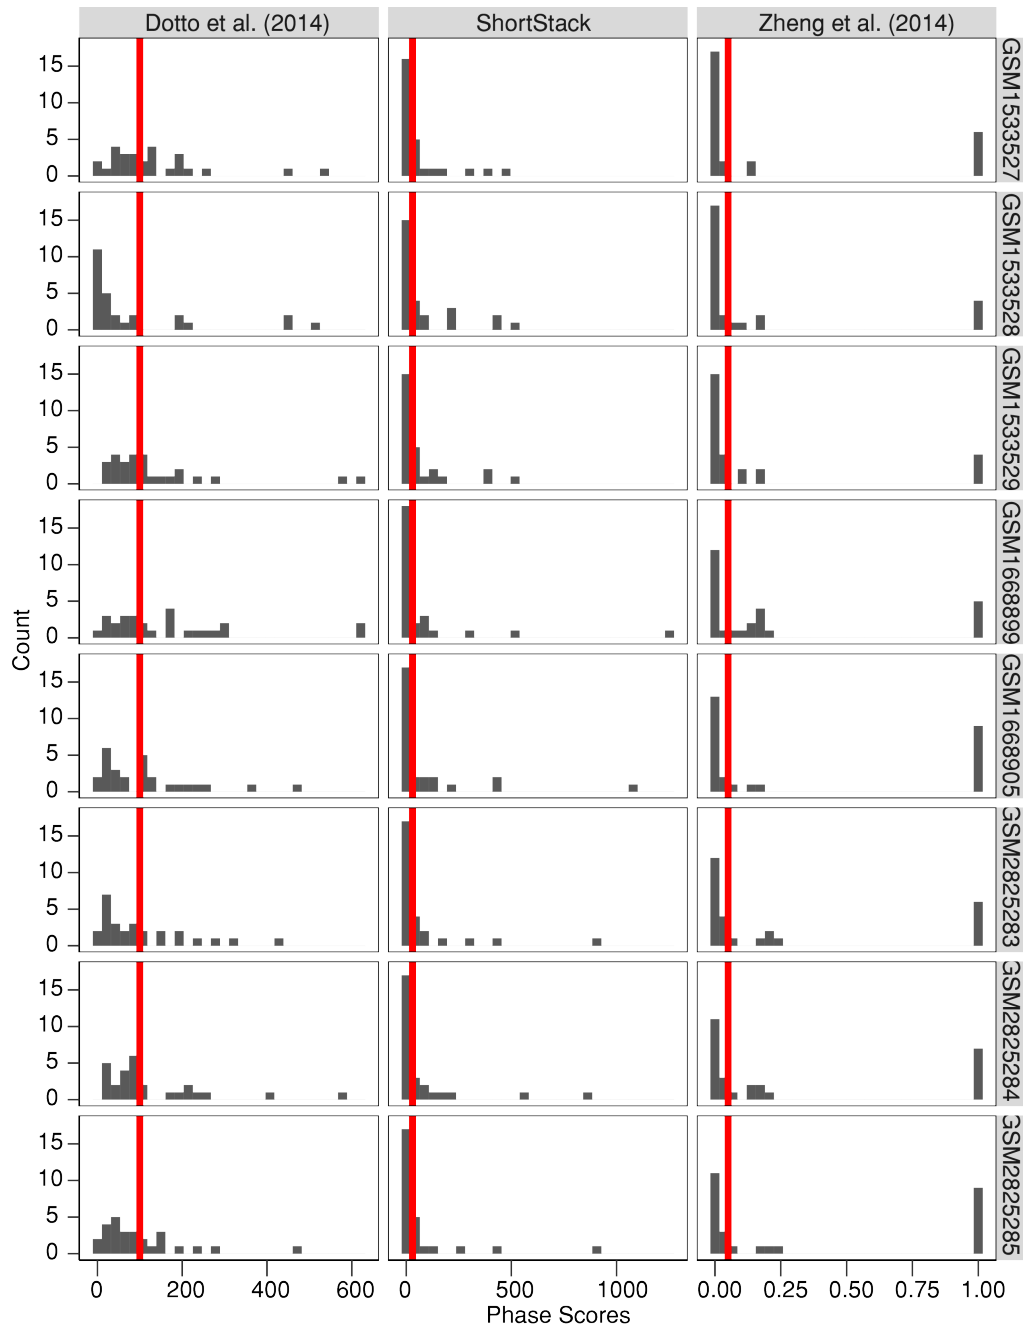

741

742 **Figure S4.** Phase scores of 27 previously known *A. thaliana* phased siRNA loci from the  
743 indicated algorithms. Cutoff values for called 'phasing' in our study are shown in red.

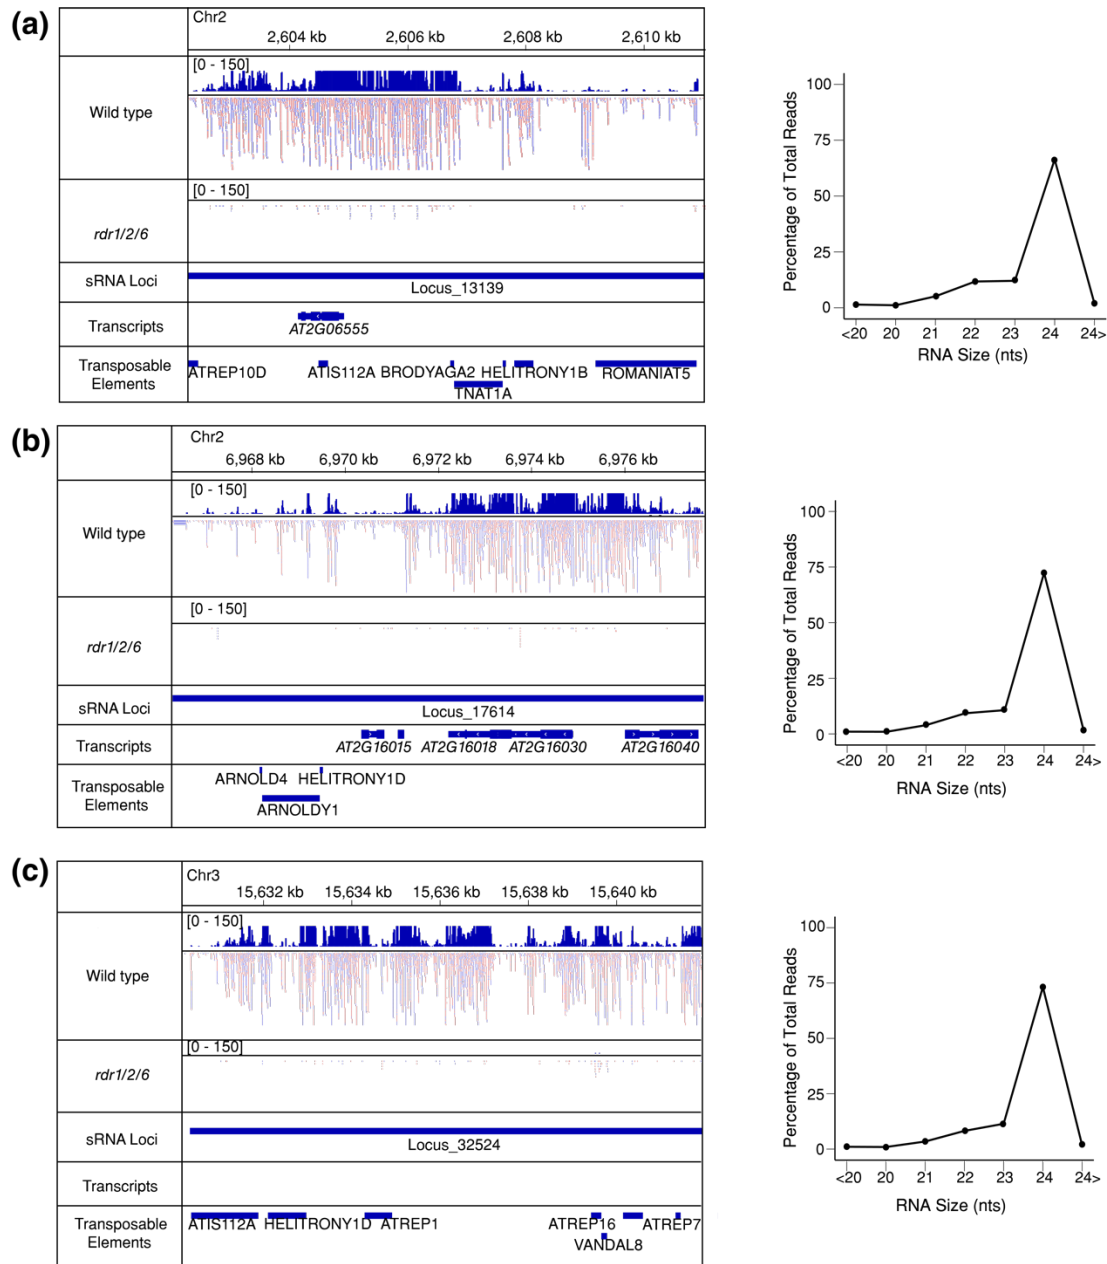

744

745 **Figure S5. Genome browser snapshots of the three *Arabidopsis thaliana* PHAS-Test**  
 746 **passing loci.**

747 (a) Alignments and read size distribution of Locus\_13139. Red reads represent positive-strand  
 748 mapped genes, while blue reads are those that mapped to the negative strand. Numbers in the  
 749 brackets are the range of coverage shown in Reads per Million.

750 (b) Same as a, except for Locus\_17614.

751 (c) Same as a, except for Locus\_32524.

## Locus\_13139

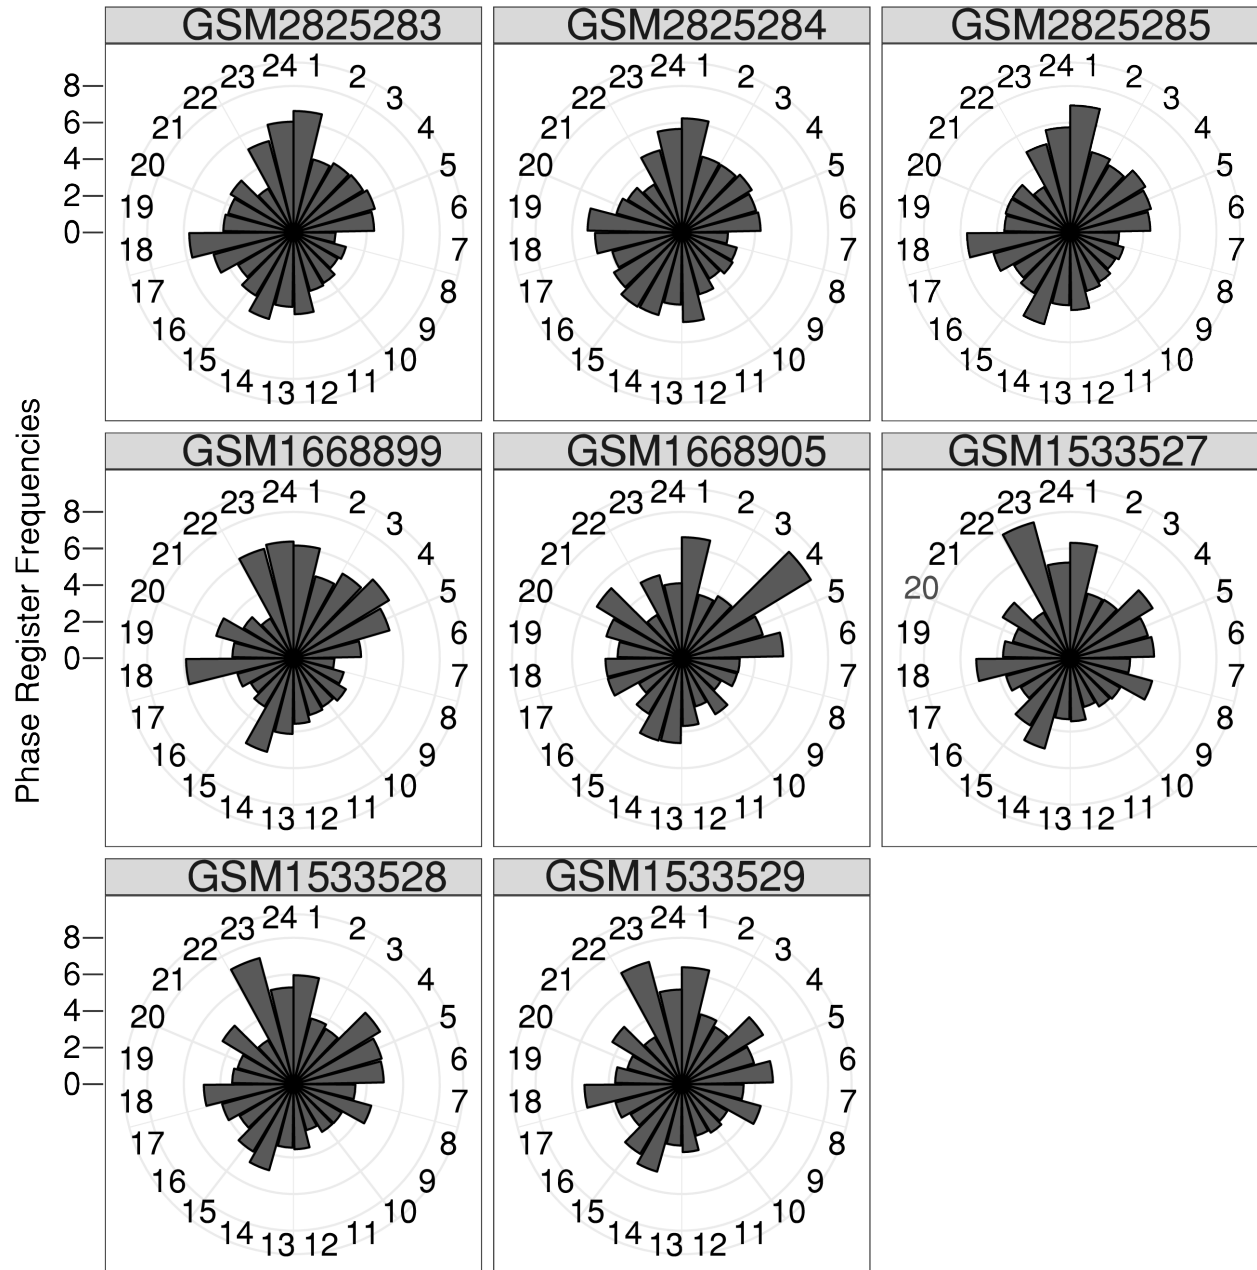

752

753

## Locus\_17614

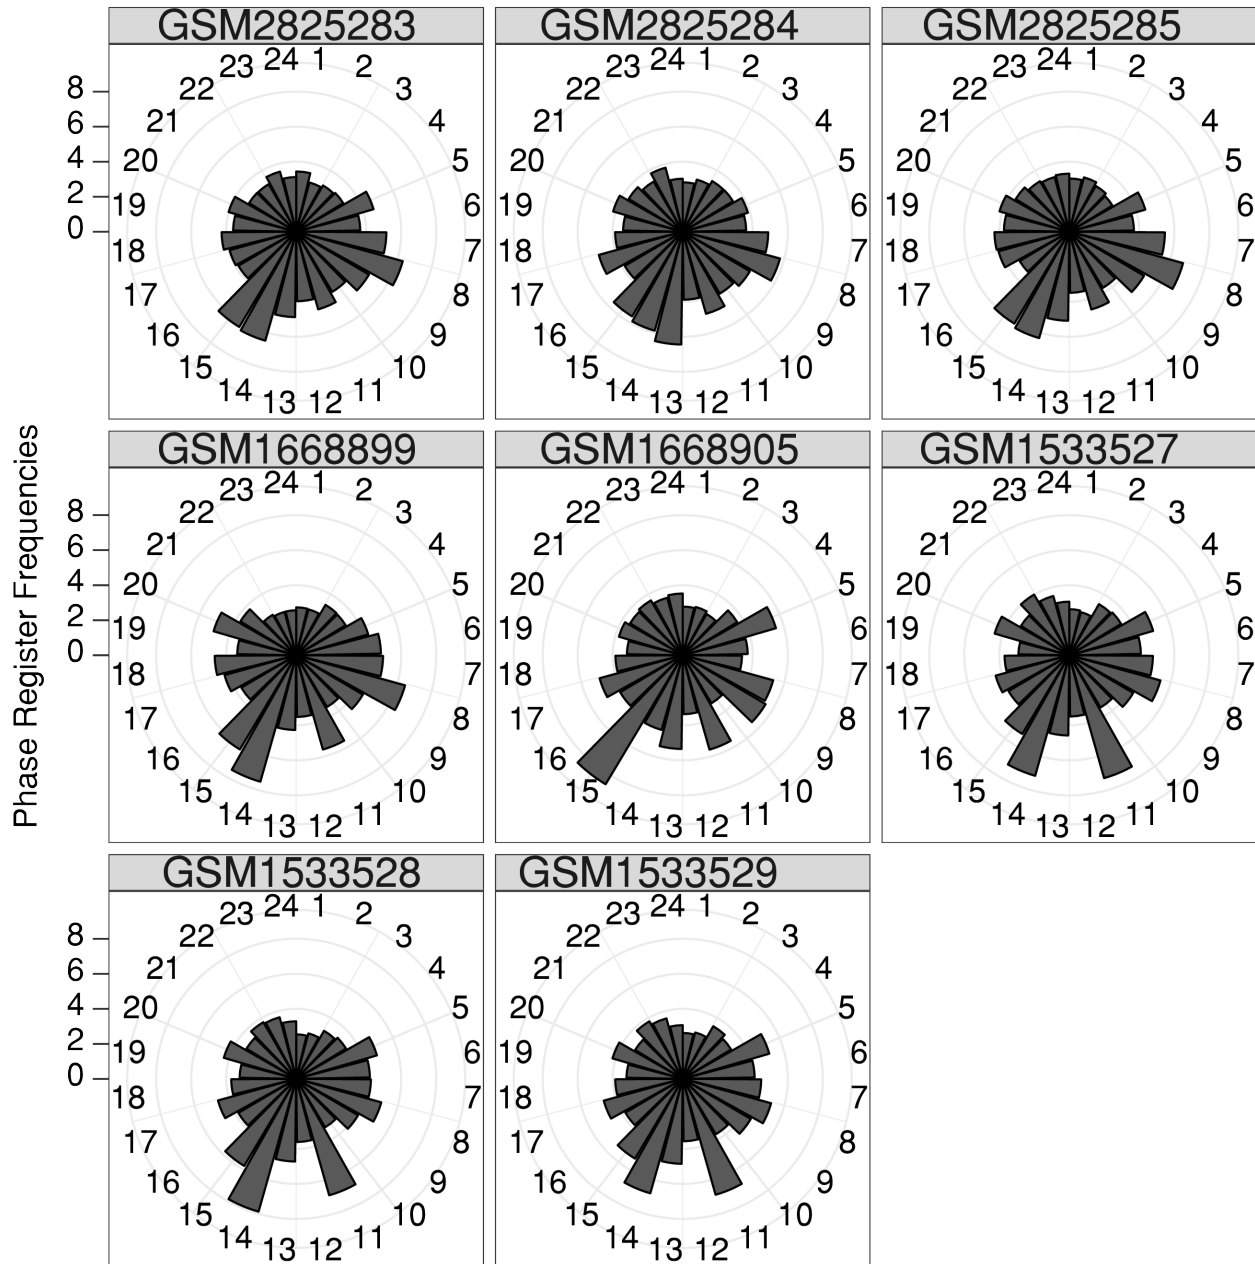

754

755



## Locus\_32524

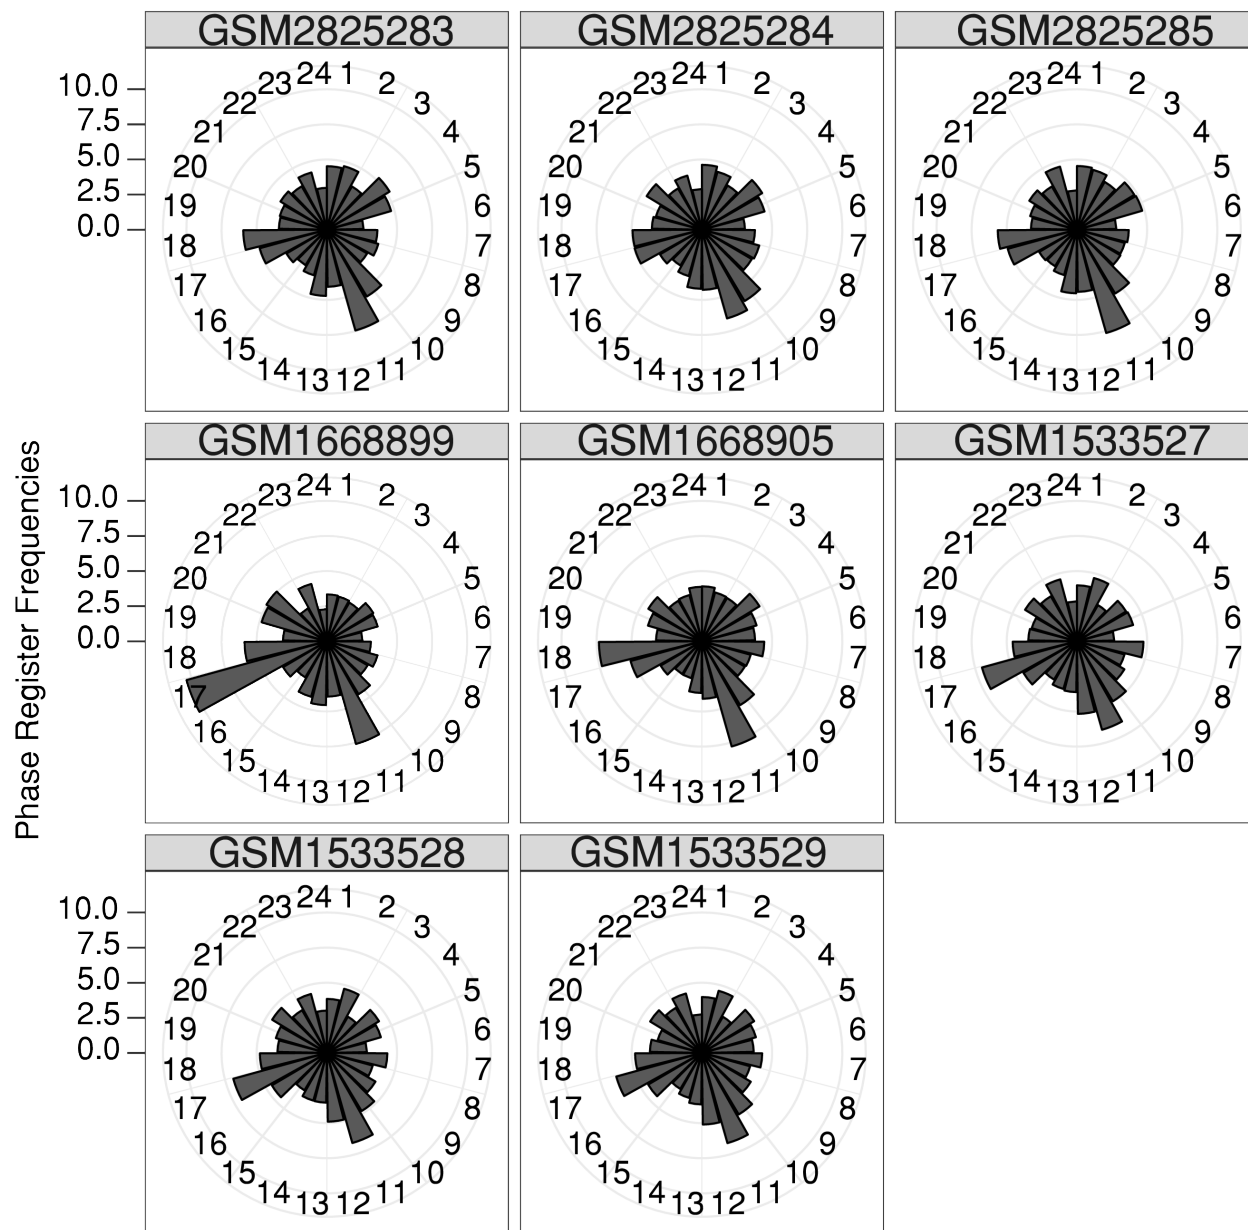

756

757

## TAS2

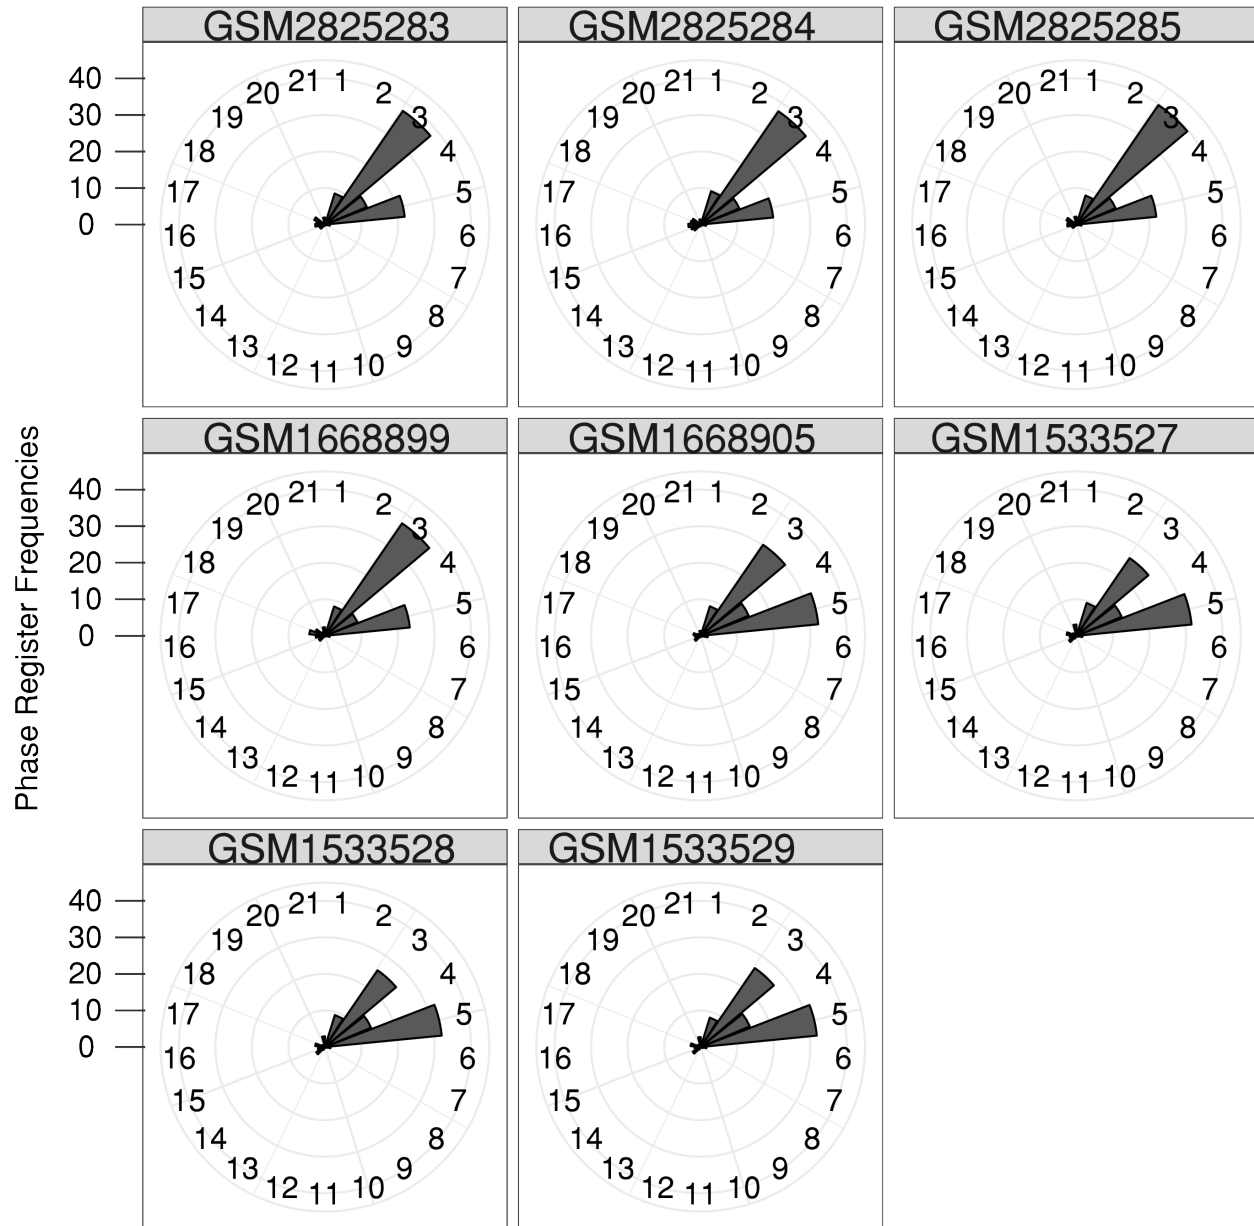

758

759 **Figure S6. The three *PHAS*-Test passing loci have inconsistent phase register frequencies.**

760 Frequencies of phase registers were calculated in eight publicly available wild-type  
761 inflorescence libraries from *A. thaliana* (the accession numbers are listed in the grey boxes).  
762 *TAS2* is shown for comparison. Phase register frequencies are calculated via the following  
763 formula: (number of reads “in phase”/ total number of reads at locus)\*100.

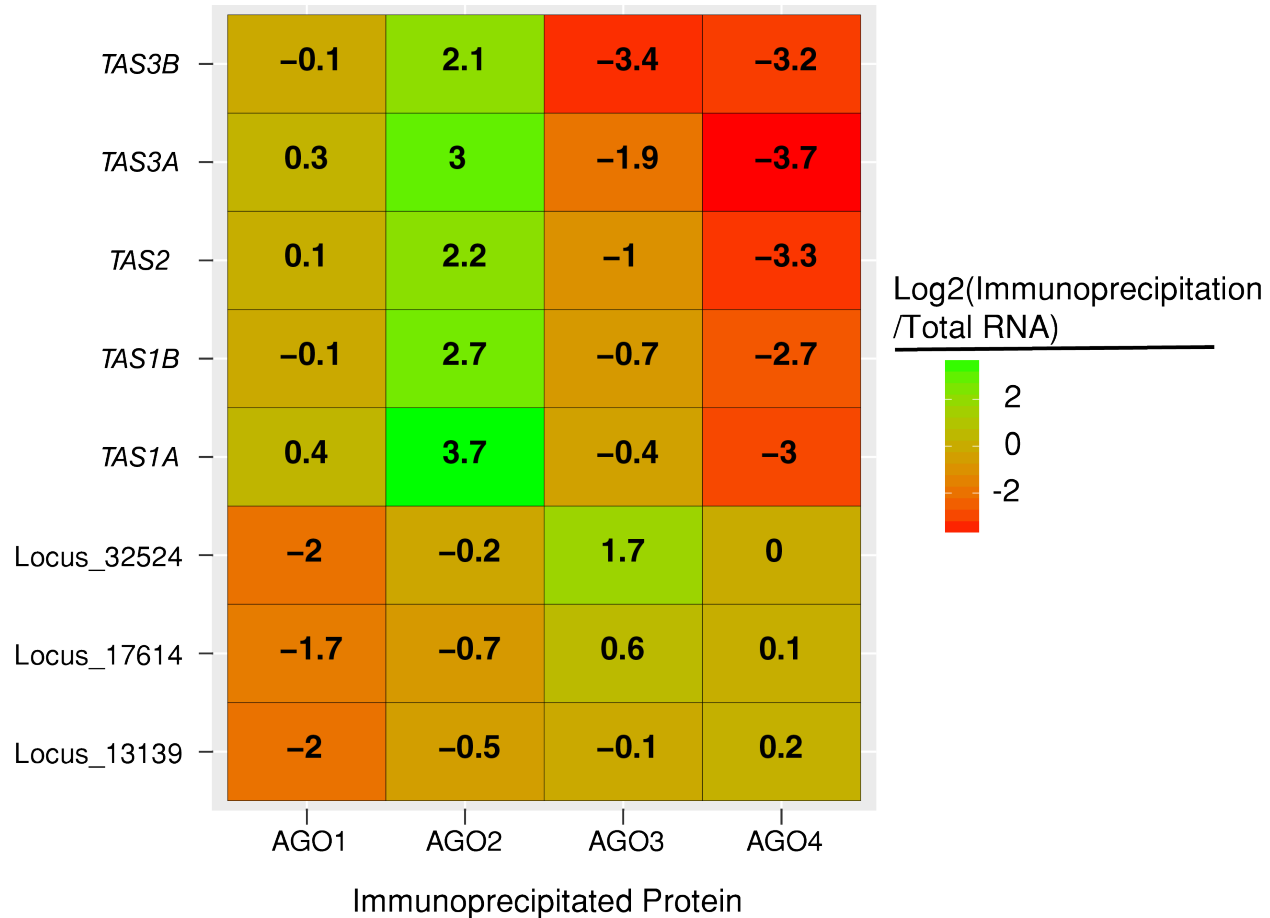

764

765 **Figure S7. The three putative 24 nt *PHAS* loci show AGO-loading profiles that are distinct**  
 766 **from *TAS* loci.**

767 Small RNAs from immunoprecipitation protein were aligned to the *A. thaliana* (TAIR10)  
 768 genome. Numbers indicate the ratio of sRNA accumulation between immunoprecipitated and  
 769 total libraries (in RPMs).

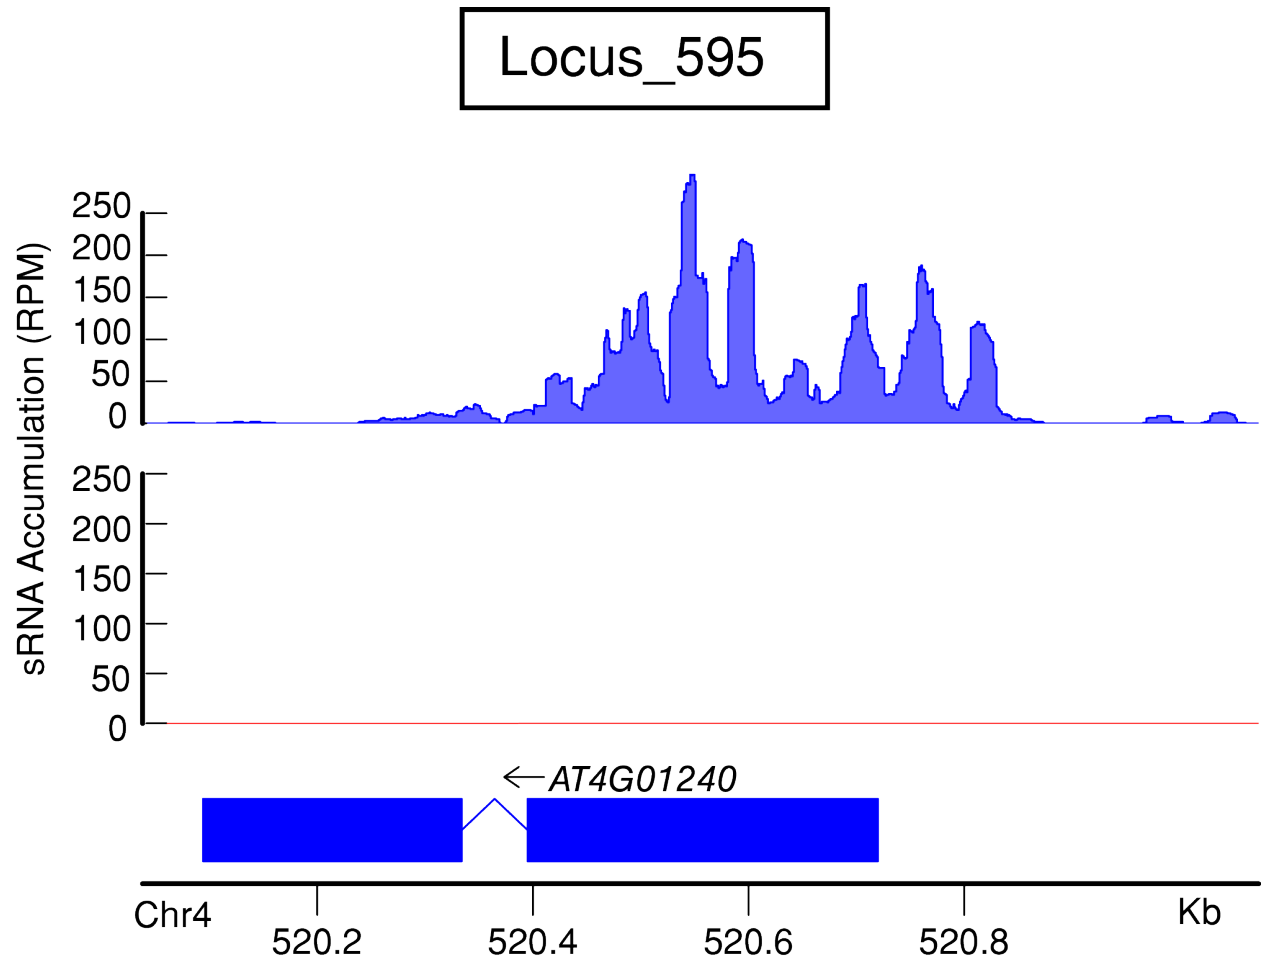

770

771

### Locus\_12303

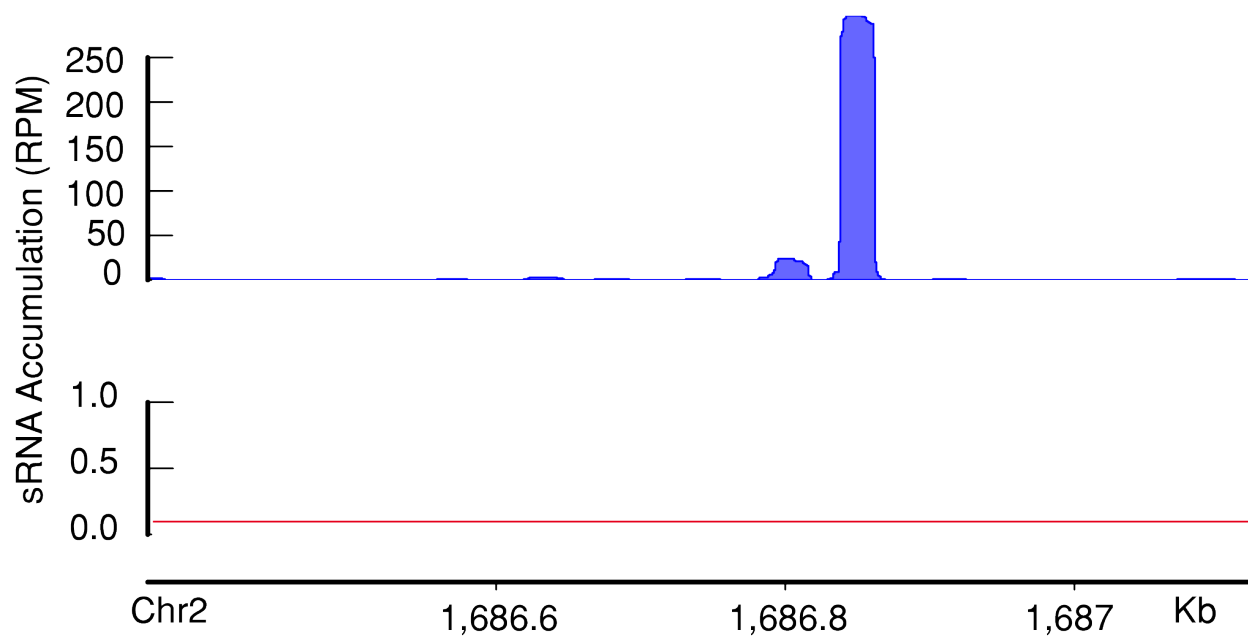

772

### Locus\_17665

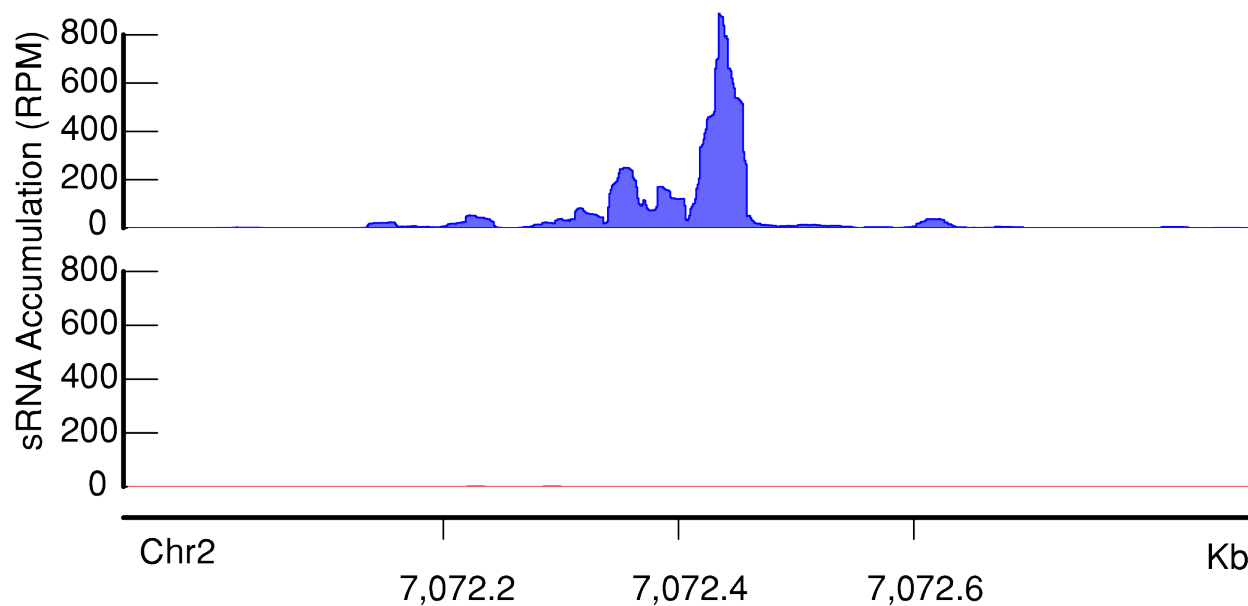

773

### Locus\_20245

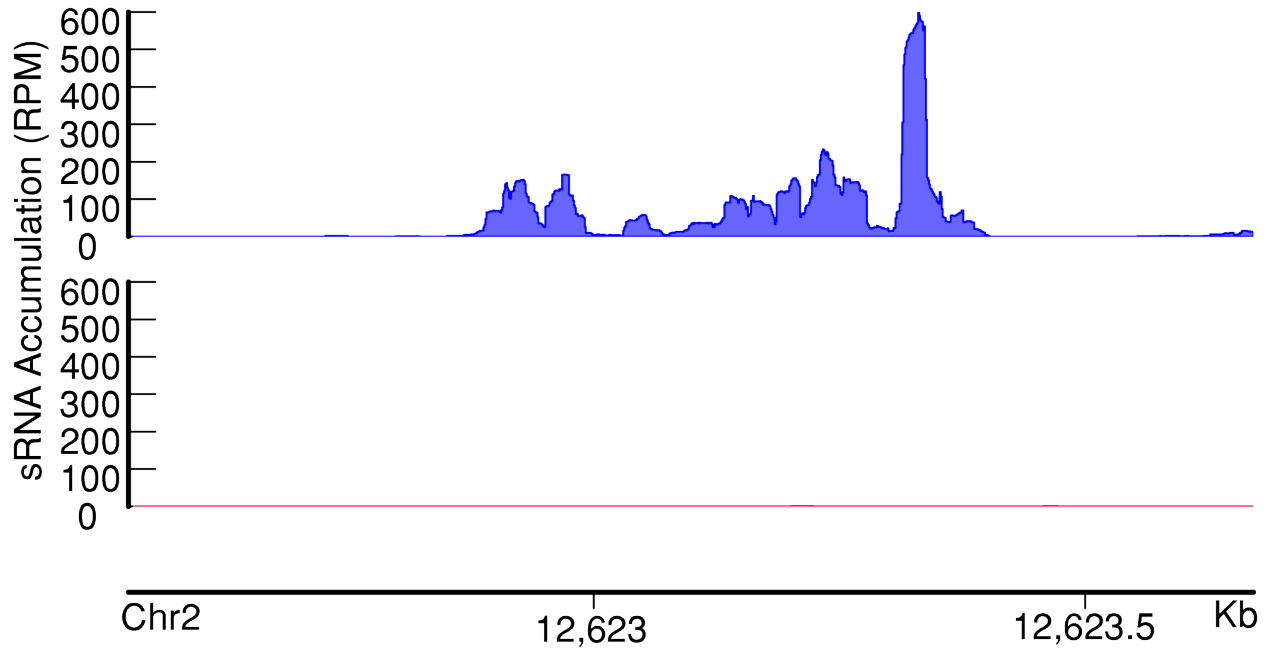

### Locus\_20677

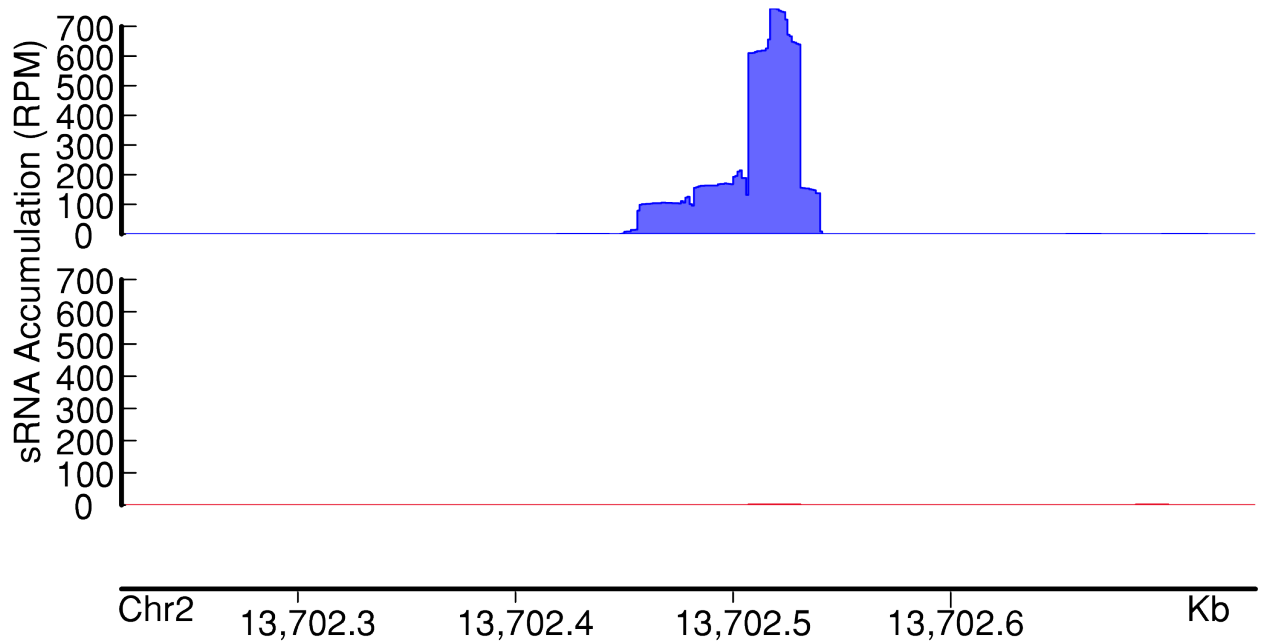

### Locus\_21121

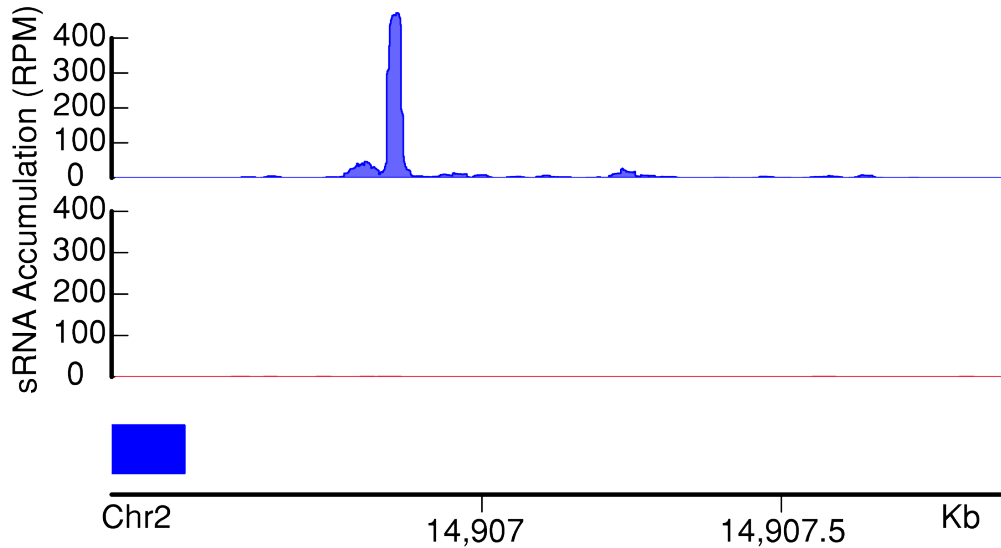

777

### Locus\_23593

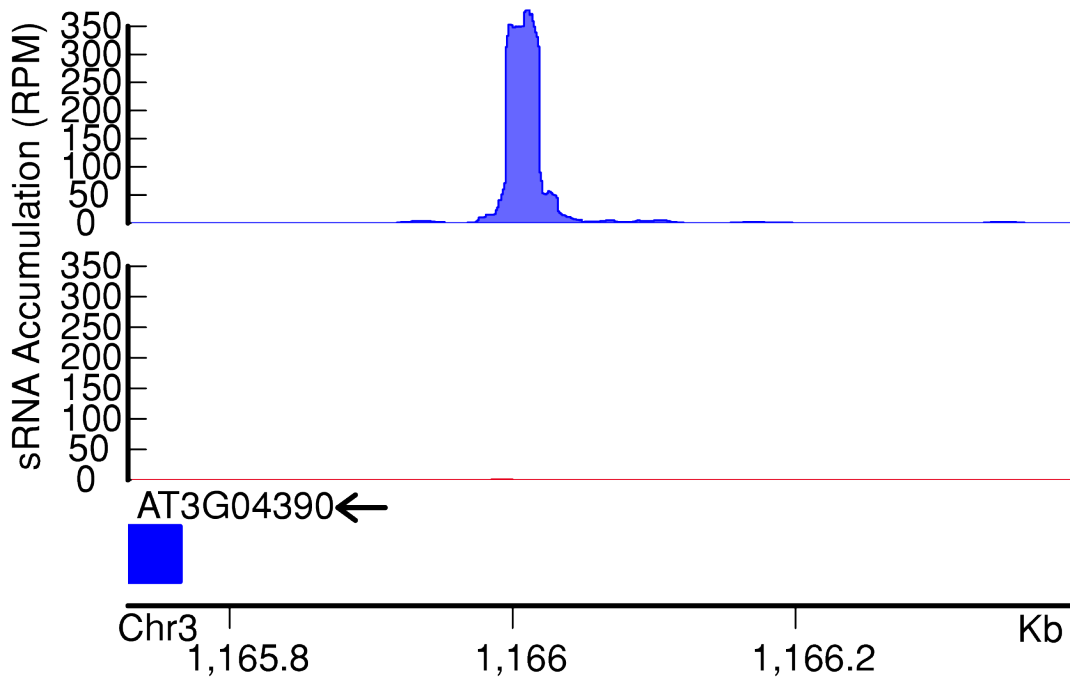

778

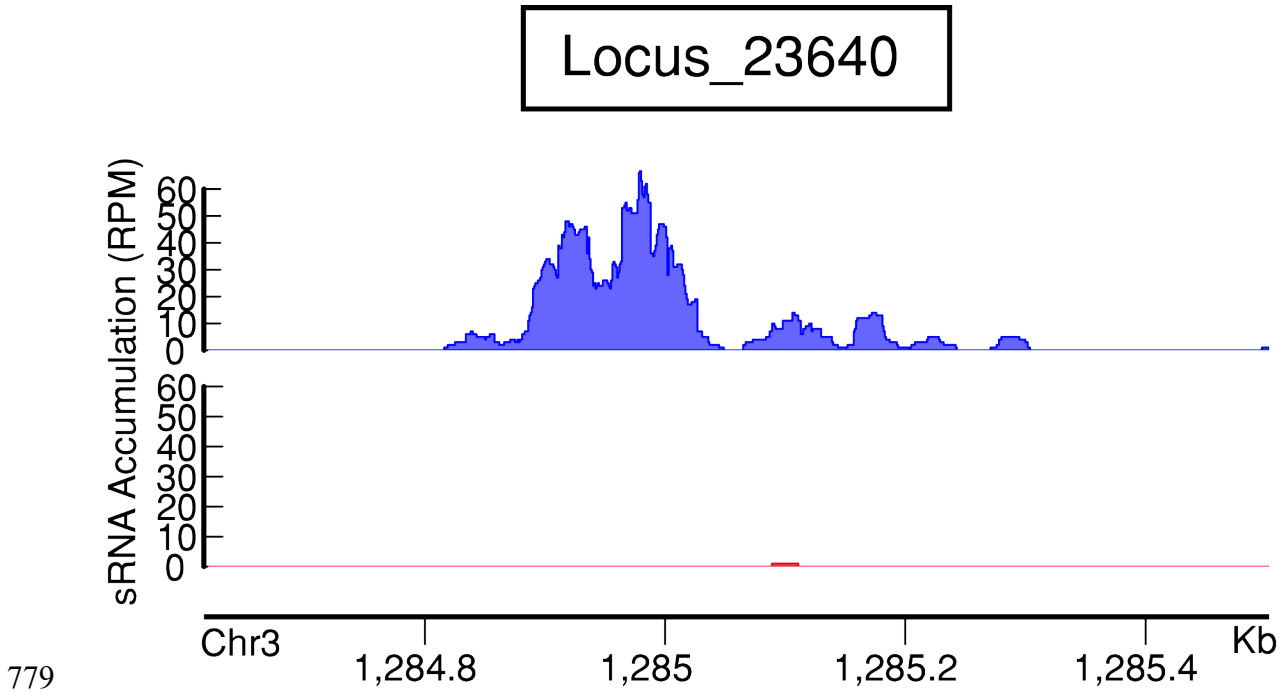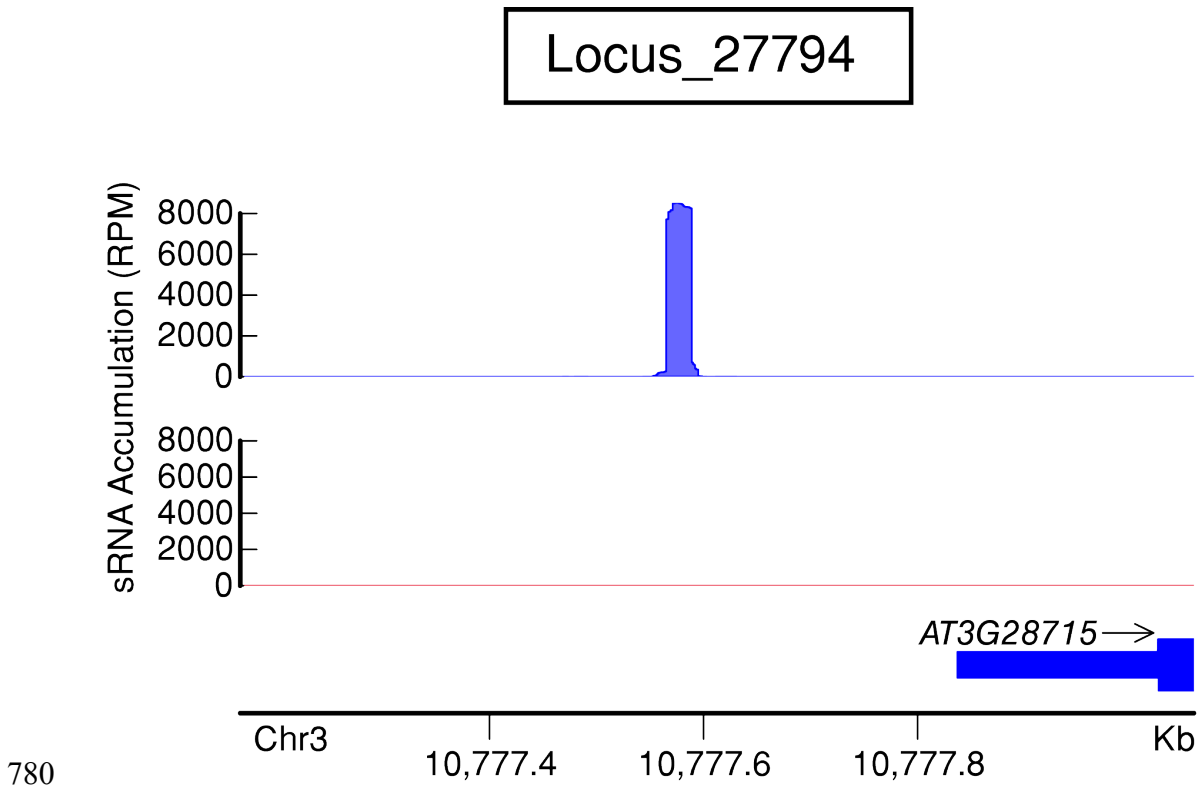



### Locus\_36447

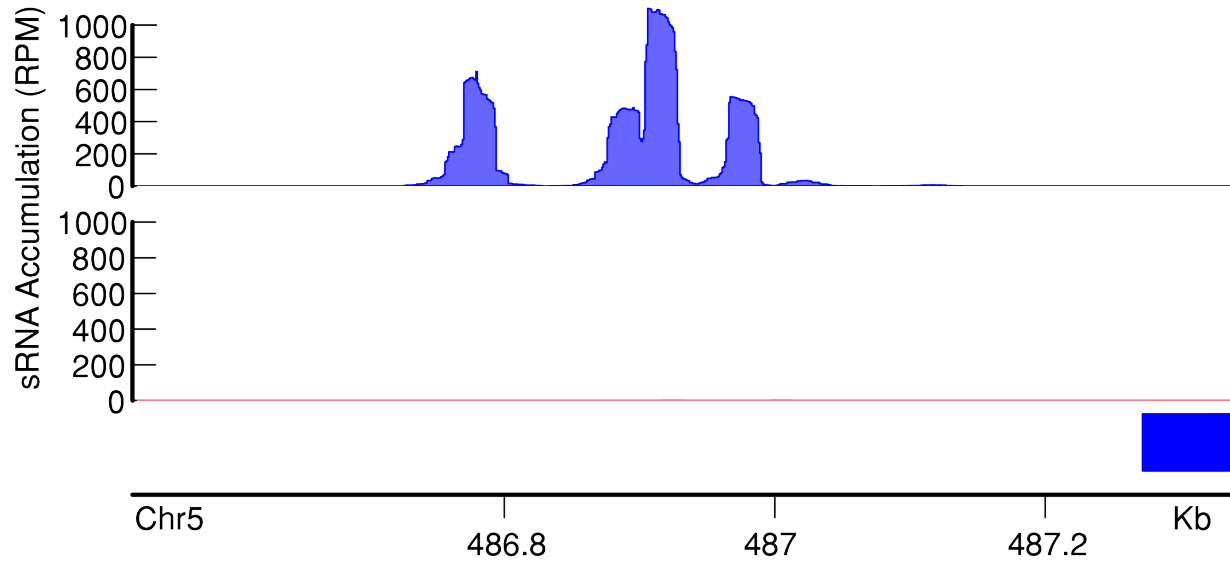

781

782

### Locus\_36450

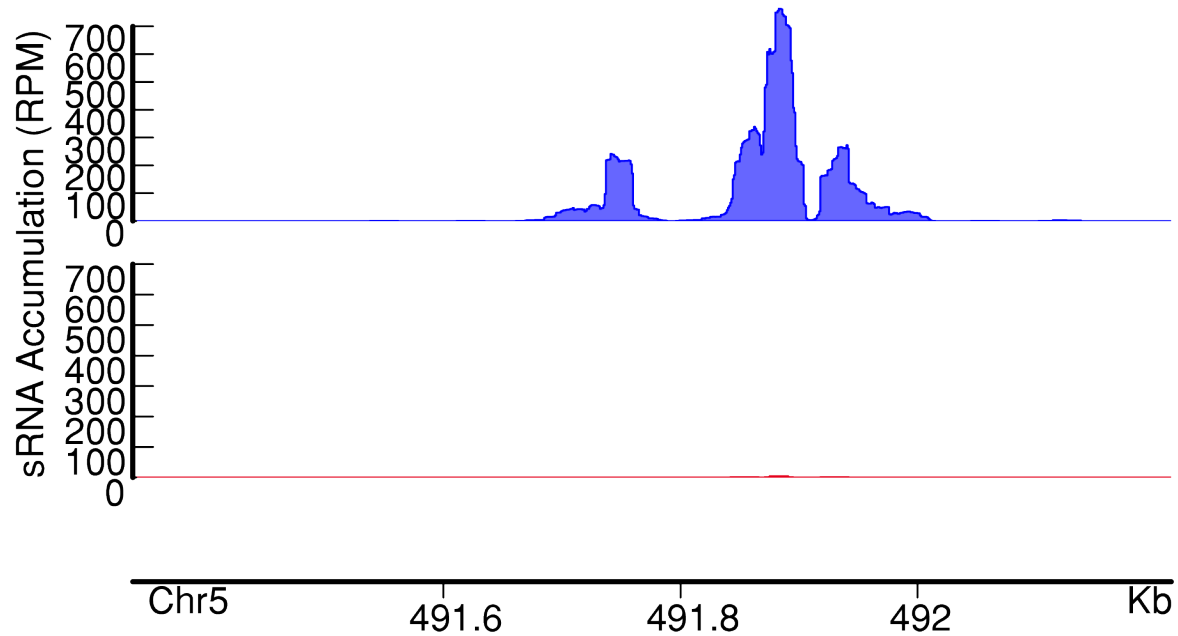

783

### Locus\_45036

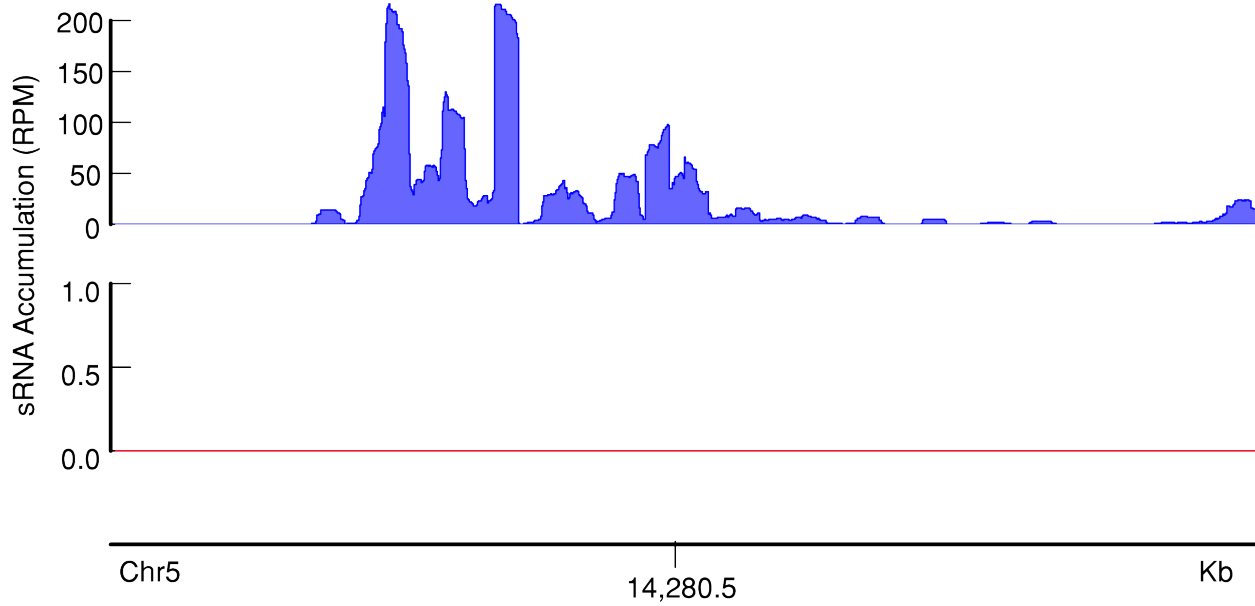

784  
785

### Locus\_46113

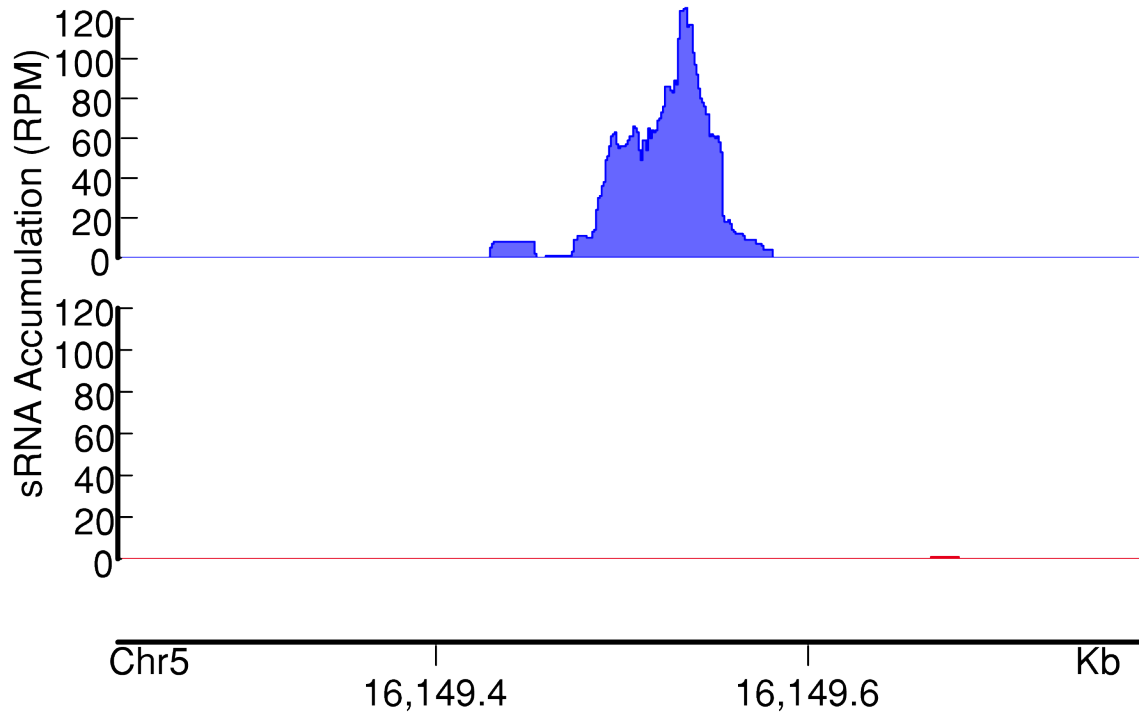

786

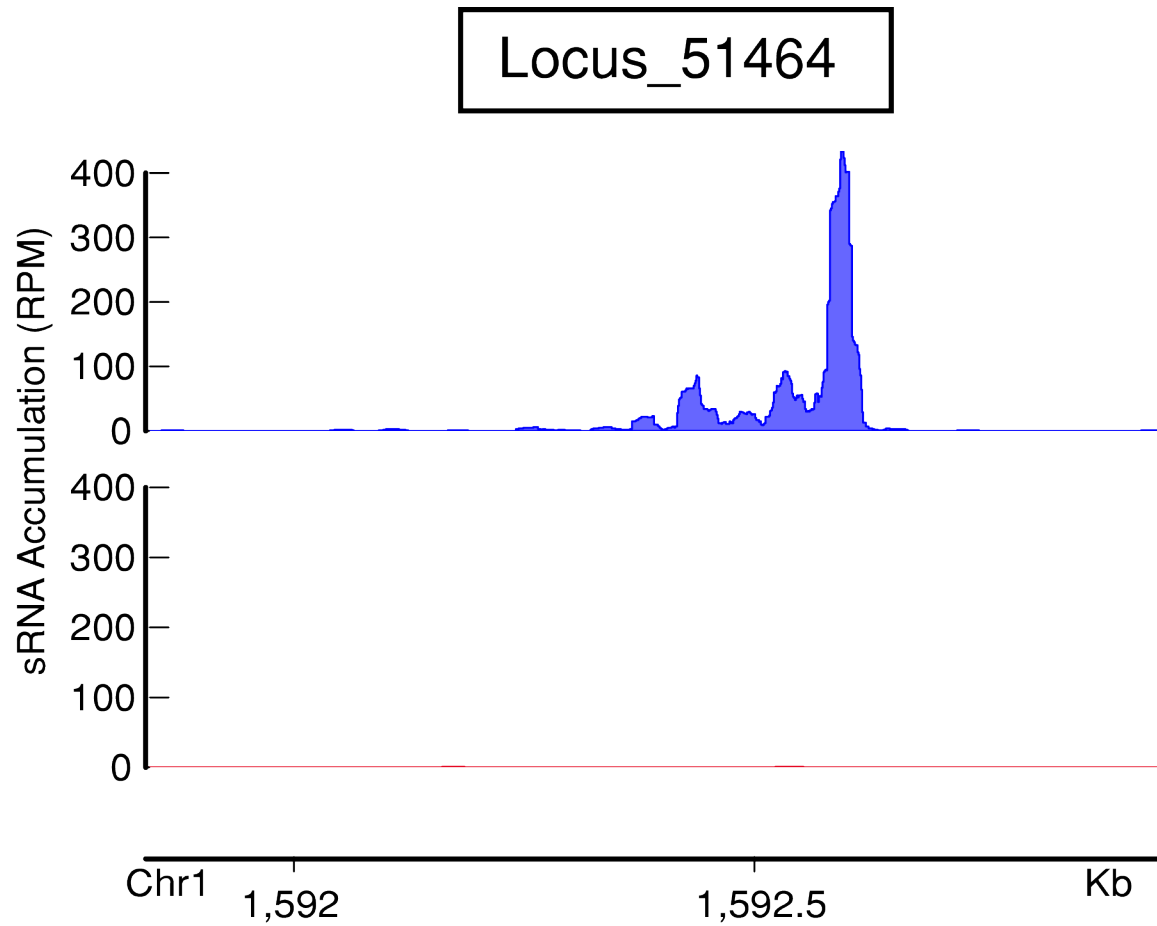

787

788

## Locus\_54003

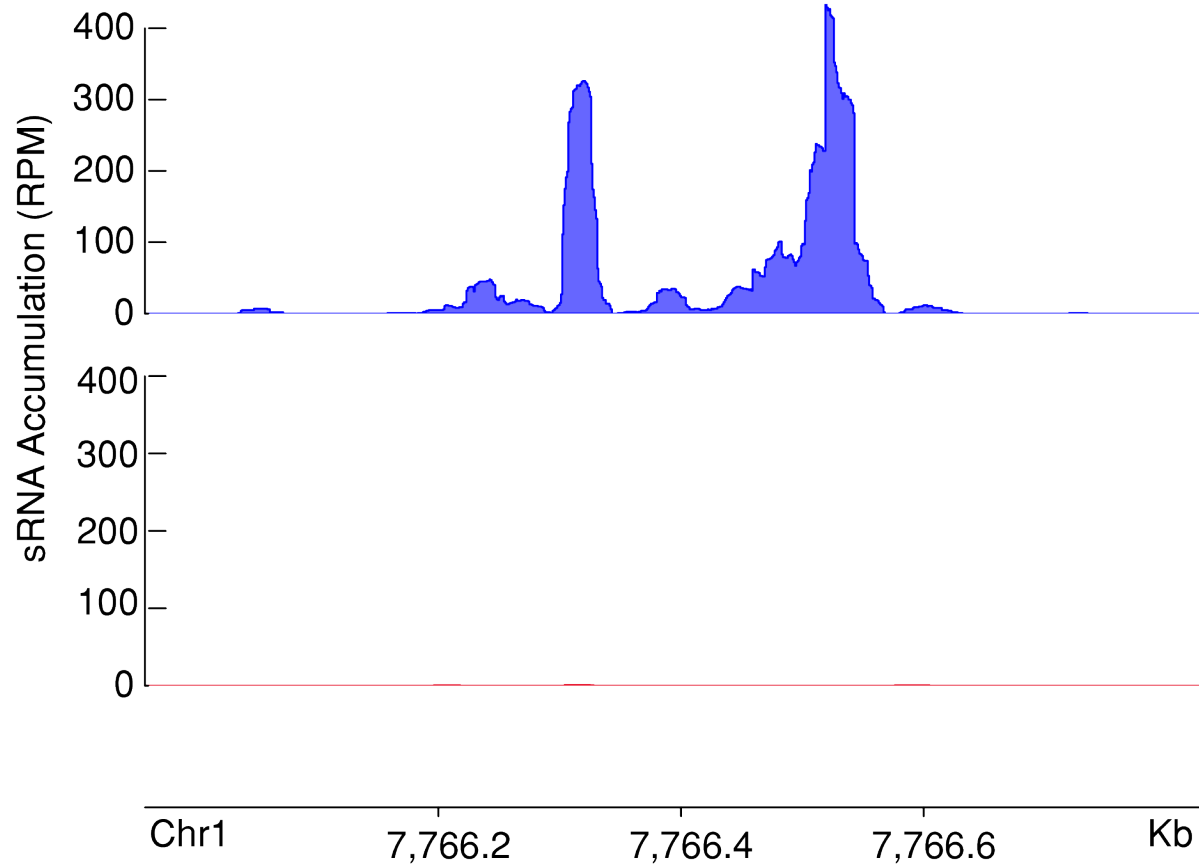

789

## Locus\_59879

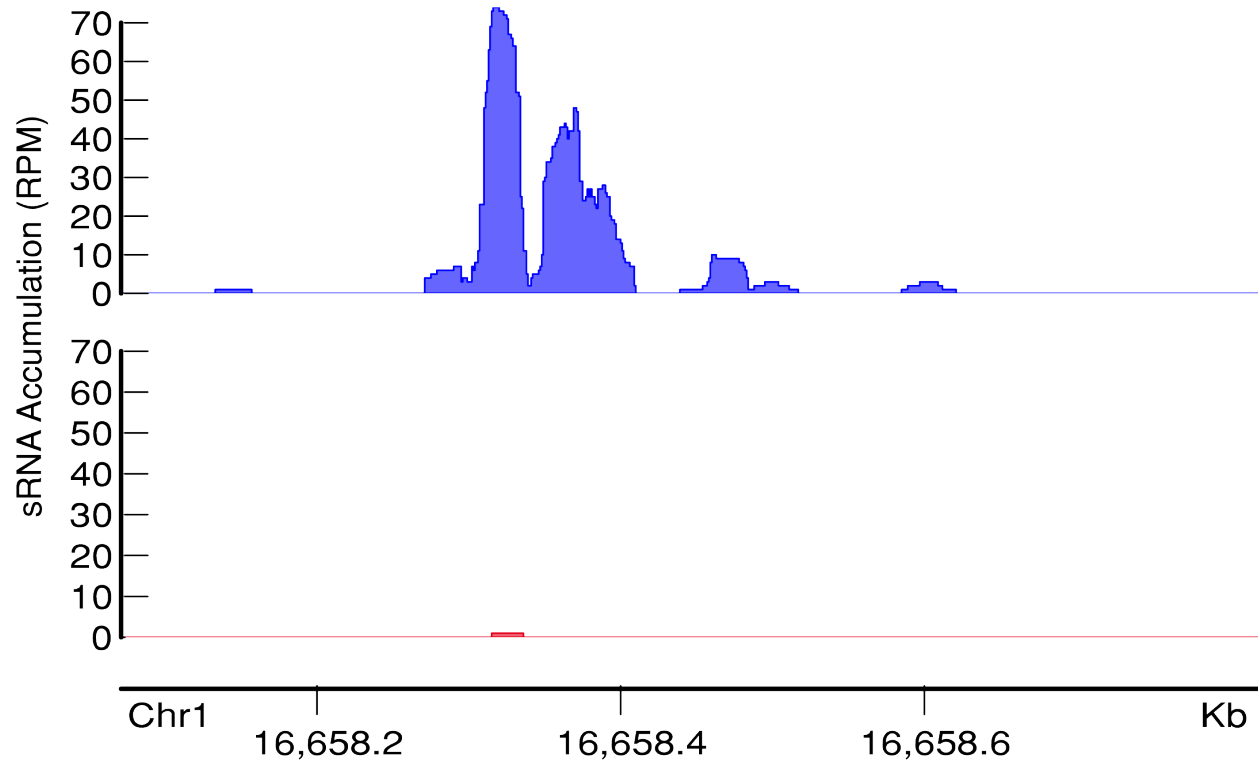

790

791

### Locus\_62375

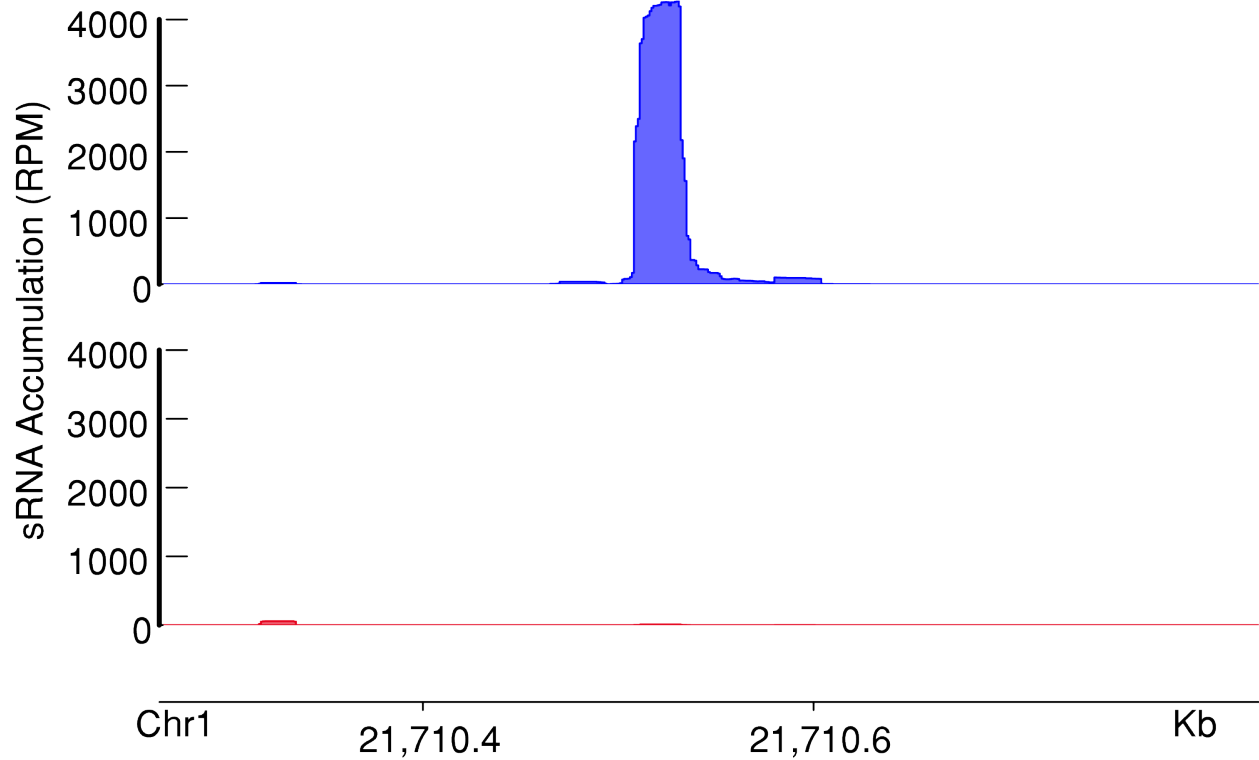

792

793

### Locus\_63135

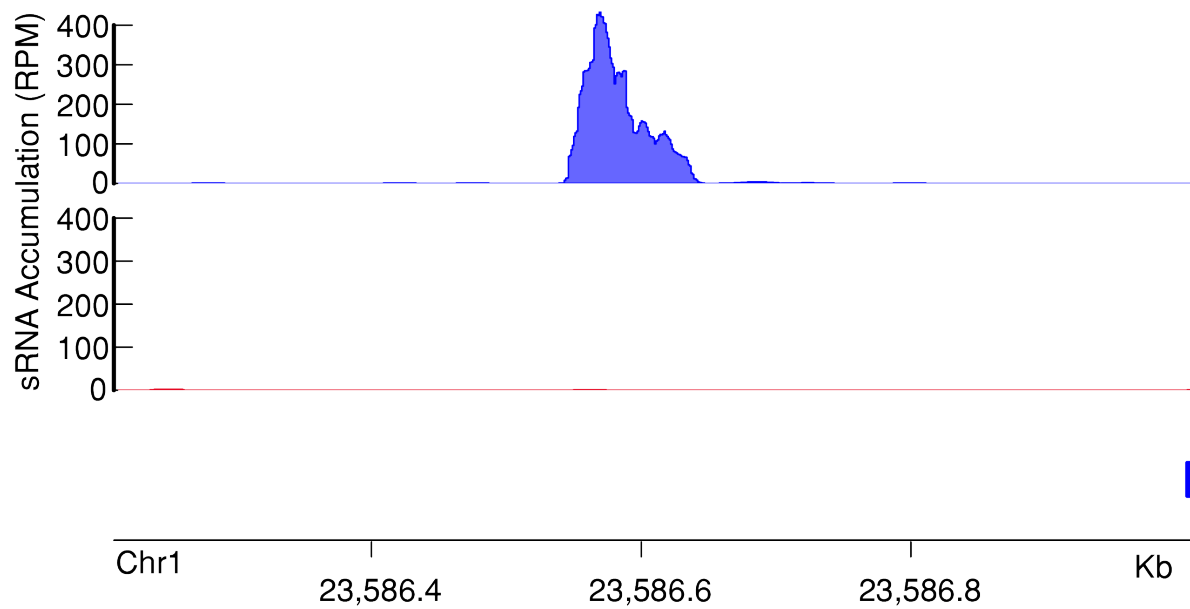

794

795

796 **Figure S8. Small RNA coverage at *rdr6*-dependent, 24 nt-dominated small RNA loci.**

797 Charts represent small RNA accumulation in RPMs at a locus (regardless of the strandedness of  
798 a read). Top chart (blue) represents accumulation in wild-type libraries, and the bottom chart  
799 (red) represents the same in *rdr1/2/6* libraries. Arrows on the gene names represent the  
800 strandedness of that gene. None had significant phasing.

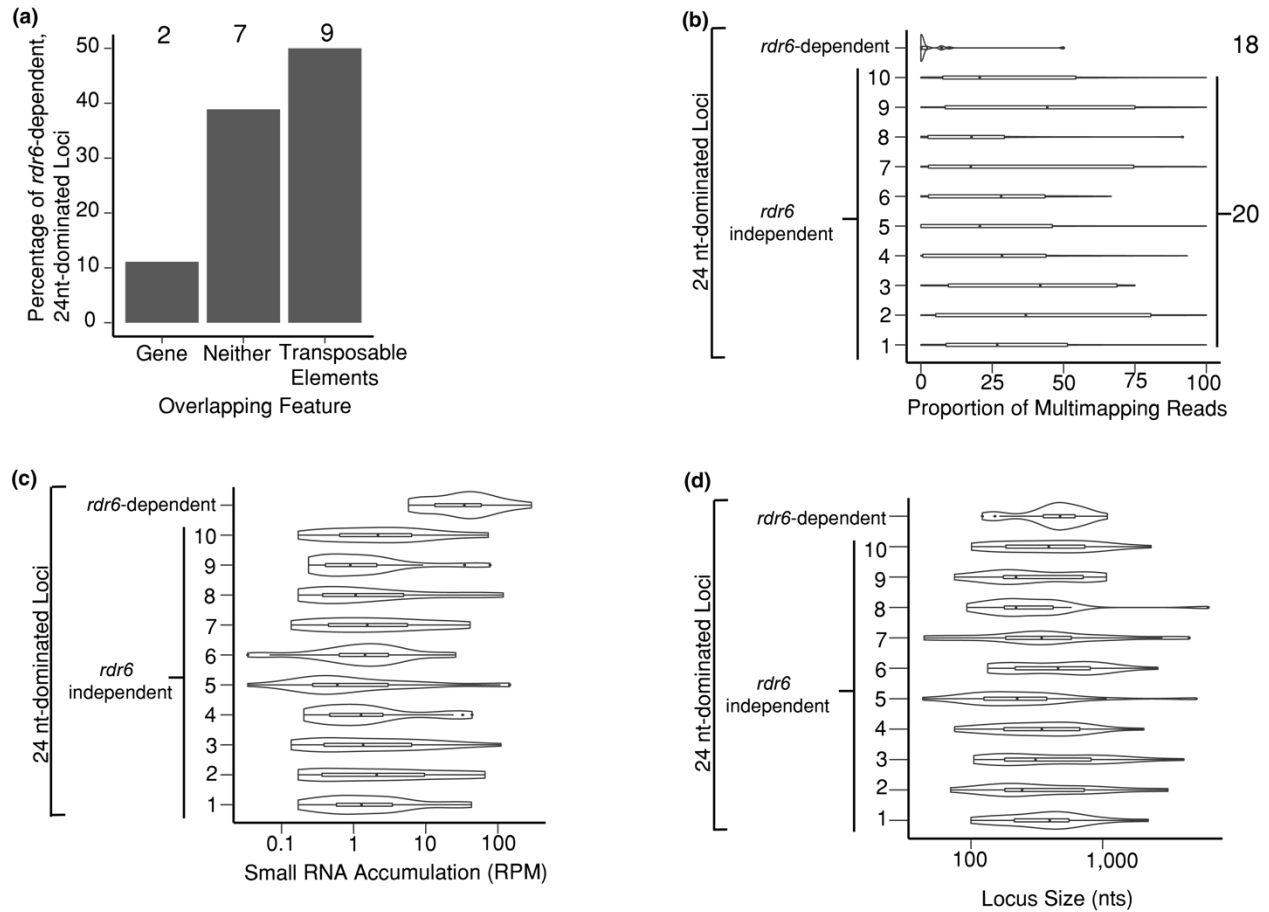

801

802 **Figure S9. *rdr6*-dependent, 24 nt-dominated loci' characteristics compared to other 24nt-**  
803 **dominated loci.**

804 (a) The overlap between *rdr6*-dependent, 24 nt-dominated loci with genes and transposons was  
805 calculated as in Figure 3a. Numbers at the top indicate the count in each category.

806 (b) The proportion of multi-mapping reads produced at *rdr6*-dependent, 24 nt-dominated loci  
807 compared to other 24 nt-dominated loci. Numbers at the top indicate the count in each category.

808 (c) Same as panel b except showing small RNA accumulation (in RPM). Amount in each  
809 category is the same as panel b.

810 (d) Same as panel b except showing length (in nts). Amount in each category is the same as  
811 panel b.



812

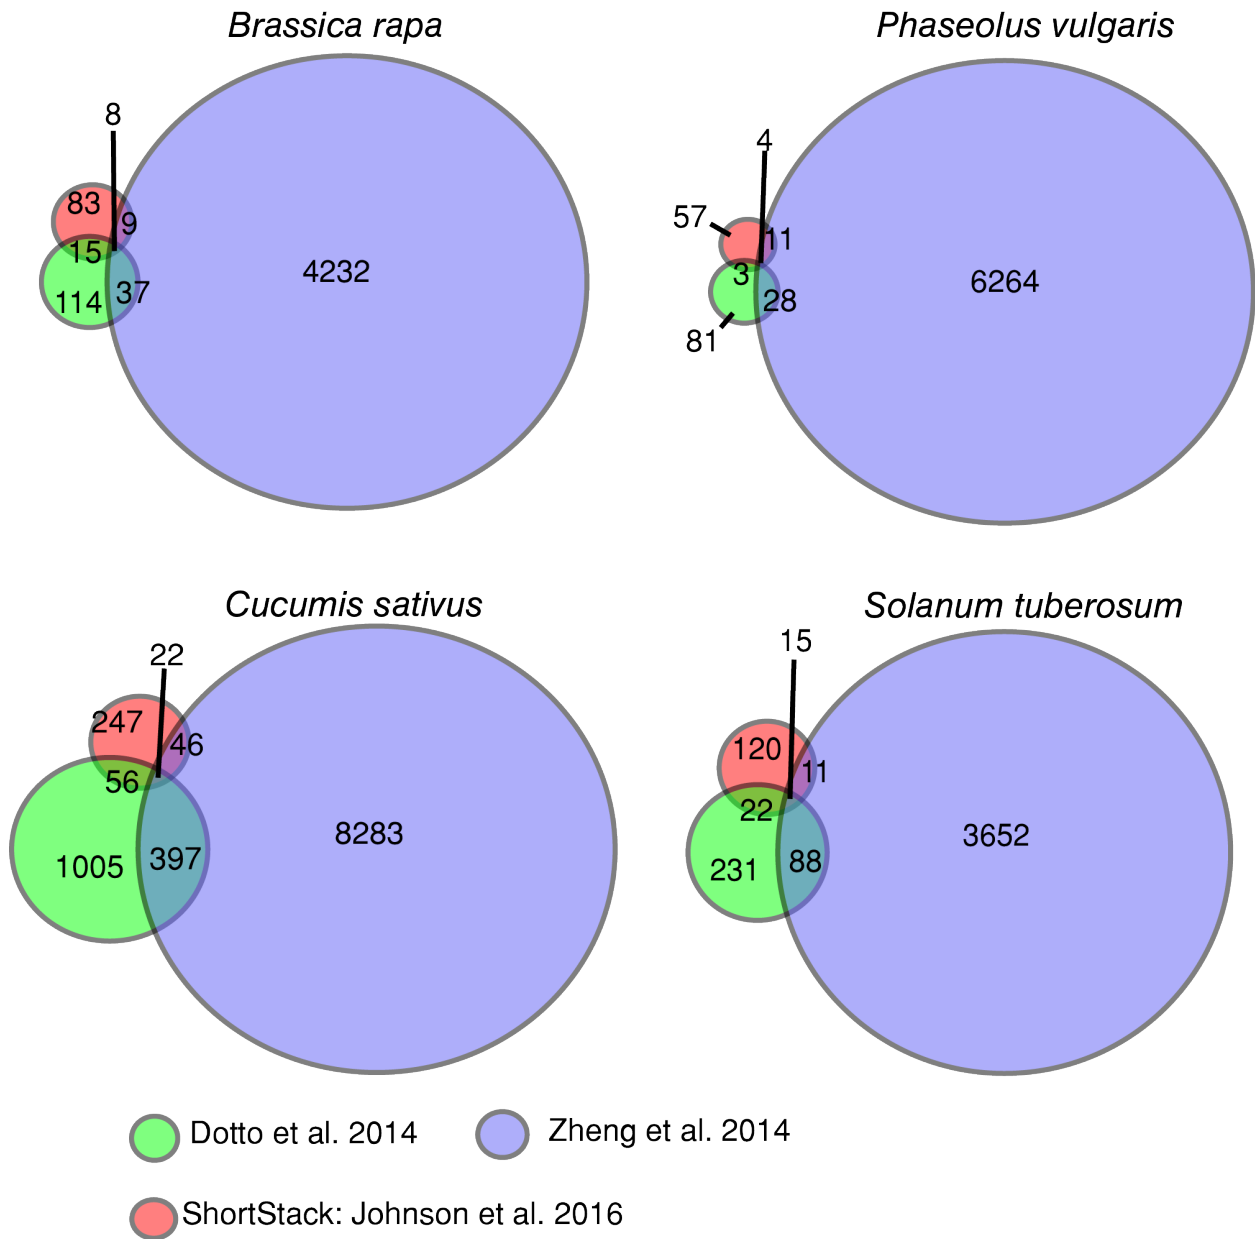

813

814 **Figure S10. Several 24 nt-dominated small RNA loci pass *PHAS*-detection algorithms in**  
815 **four other eudicots.**

816 Venn diagram shows numbers of 24 nt-dominated loci that were called 'phased' by the indicated  
817 algorithms. Species examined is shown above the graphs.

818 **Table S1. List of 25 known 21 nt PHAS loci in *A. thaliana*.**

| Chr. | Start    | Stop     | Locus Name                   | Source                     |
|------|----------|----------|------------------------------|----------------------------|
| Chr2 | 11721539 | 11722468 | <i>TAS1a</i>                 | (Vazquez et al., 2004)     |
| Chr1 | 18549204 | 18550042 | <i>TAS1b</i>                 | (Allen et al., 2005)       |
| Chr2 | 16537288 | 16538277 | <i>TAS1c</i>                 | (Allen et al., 2005)       |
| Chr2 | 16539384 | 16540417 | <i>TAS2</i>                  | (Allen et al., 2005)       |
| Chr3 | 5861491  | 5862437  | <i>TAS3a</i>                 | (Montgomery et al., 2008)  |
| Chr5 | 20134200 | 20134786 | <i>TAS3b</i>                 | (Howell et al., 2007)      |
| Chr5 | 23394005 | 23394500 | <i>TAS3c</i>                 | (Howell et al., 2007)      |
| Chr3 | 9415004  | 9422587  | <i>TAS4</i>                  | (Rajagopalan et al., 2006) |
| Chr1 | 23299057 | 23300958 | <i>PPR-At1g62910</i>         | (Ronemus et al., 2006)     |
| Chr1 | 23412730 | 23415149 | <i>PPR-At1g63130</i>         | (Ronemus et al., 2006)     |
| Chr1 | 23306534 | 23308683 | <i>PPR-At1g62930</i>         | (Ronemus et al., 2006)     |
| Chr1 | 23387631 | 23390816 | <i>PPR-At1g63080</i>         | (Ronemus et al., 2006)     |
| Chr1 | 23507320 | 23509053 | <i>PPR-At1g63400</i>         | (Ronemus et al., 2006)     |
| Chr1 | 23419396 | 23421579 | <i>PPR-At1g63150</i>         | (Ronemus et al., 2006)     |
| Chr1 | 23385324 | 23387167 | <i>PPR-At1g63070</i>         | (Ronemus et al., 2006)     |
| Chr1 | 23489840 | 23491519 | <i>PPR-At1g63330</i>         | (Ronemus et al., 2006)     |
| Chr1 | 23176930 | 23179248 | <i>PPR-At1g62590</i>         | (Ronemus et al., 2006)     |
| Chr5 | 15555156 | 15558732 | <i>TIR-NBS-LRR-At5g38850</i> | (Howell et al., 2007)      |
| Chr1 | 4368760  | 4371293  | <i>AFB3</i>                  | (Si-Ammour et al., 2011)   |
| Chr5 | 16638370 | 16641728 | <i>ATCHX18</i>               | (Howell et al., 2007)      |
| Chr1 | 17886098 | 17892586 | <i>AGO1</i>                  | (Axtell et al., 2006)      |
| Chr3 | 23273116 | 23276375 | <i>TIR1</i>                  | (Si-Ammour et al., 2011)   |
| Chr4 | 1404887  | 1407139  | <i>AFB1</i>                  | (Si-Ammour et al., 2011)   |
| Chr3 | 9867845  | 9870640  | <i>AFB2</i>                  | (Si-Ammour et al., 2011)   |
| Chr5 | 15757717 | 15758109 | <i>SLG</i>                   | (Chen et al., 2007)        |
| Chr4 | 8380848  | 8383496  | <i>CC-NBS-LRR-At4g14610</i>  | (Zhai et al., 2011)        |
| Chr4 | 8146345  | 8152131  | <i>MET2</i>                  | (Chen et al., 2010)        |

819

820 **Reference Cited (Table S1)**

821 **Allen, E., Xie, Z., Gustafson, A. M., & Carrington, J. C.** (2005). microRNA-directed phasing

822 during trans-acting siRNA biogenesis in plants. *Cell*, 121(2), 207–221.

823 <https://doi.org/10.1016/j.cell.2005.04.004>

824 **Axtell, M. J., Jan, C., Rajagopalan, R., & Bartel, D. P.** (2006). A two-hit trigger for siRNA

825 biogenesis in plants. *Cell*, 127(3), 565–577. <https://doi.org/10.1016/j.cell.2006.09.032>

- 826 **Chen, H.-M., Chen, L.-T., Patel, K., Li, Y.-H., Baulcombe, D. C., & Wu, S.-H.** (2010). 22-  
827 nucleotide RNAs trigger secondary siRNA biogenesis in plants. *Proceedings of the*  
828 *National Academy of Sciences of the United States of America*, *107*(34), 15269–15274.  
829 <https://doi.org/10.1073/pnas.1001738107>
- 830 **Chen, H.-M., Li, Y.-H., & Wu, S.-H.** (2007). Bioinformatic prediction and experimental  
831 validation of a microRNA-directed tandem trans-acting siRNA cascade in Arabidopsis.  
832 *Proceedings of the National Academy of Sciences*, *104*(9), 3318–3323.  
833 <https://doi.org/10.1073/pnas.0611119104>
- 834 **Howell, M. D., Fahlgren, N., Chapman, E. J., Cumbie, J. S., Sullivan, C. M., Givan, S. A.,**  
835 **& Carrington, J. C.** (2007). Genome-Wide Analysis of the RNA-DEPENDENT RNA  
836 POLYMERASE6/DICER-LIKE4 Pathway in Arabidopsis Reveals Dependency on  
837 miRNA- and tasiRNA-Directed Targeting. *The Plant Cell*, *19*(3), 926–942.  
838 <https://doi.org/10.1105/tpc.107.050062>
- 839 **Montgomery, T. A., Howell, M. D., Cuperus, J. T., Li, D., Hansen, J. E., Alexander, A. L.,**  
840 **& Carrington, J. C.** (2008). Specificity of ARGONAUTE7-miR390 Interaction and  
841 Dual Functionality in TAS3 Trans-Acting siRNA Formation. *Cell*, *133*(1), 128–141.  
842 <https://doi.org/10.1016/j.cell.2008.02.033>
- 843 **Rajagopalan, R., Vaucheret, H., Trejo, J., & Bartel, D. P.** (2006). A diverse and  
844 evolutionarily fluid set of microRNAs in Arabidopsis thaliana. *Genes & Development*,  
845 *20*(24), 3407–3425. <https://doi.org/10.1101/gad.1476406>
- 846 **Ronemus, M., Vaughn, M. W., & Martienssen, R. A.** (2006). MicroRNA-Targeted and Small  
847 Interfering RNA-Mediated mRNA Degradation Is Regulated by Argonaute, Dicer, and

848 RNA-Dependent RNA Polymerase in Arabidopsis. *The Plant Cell*, 18(7), 1559–1574.

849 <https://doi.org/10.1105/tpc.106.042127>

850 **Si-Ammour, A., Windels, D., Arn-Boulidoires, E., Kutter, C., Ailhas, J., Meins, F., &**

851 **Vazquez, F.** (2011). miR393 and Secondary siRNAs Regulate Expression of the

852 TIR1/AFB2 Auxin Receptor Clade and Auxin-Related Development of Arabidopsis

853 Leaves. *Plant Physiology*, 157(2), 683–691. <https://doi.org/10.1104/pp.111.180083>

854 **Vazquez, F., Vaucheret, H., Rajagopalan, R., Lepers, C., Gascioli, V., Mallory, A. C., &**

855 **Crété, P.** (2004). Endogenous trans-Acting siRNAs Regulate the Accumulation of

856 Arabidopsis mRNAs. *Molecular Cell*, 16(1), 69–79.

857 <https://doi.org/10.1016/j.molcel.2004.09.028>

858 **Zhai, J., Jeong, D.-H., Paoli, E. D., Park, S., Rosen, B. D., Li, Y., & Meyers, B. C.** (2011).

859 MicroRNAs as master regulators of the plant NB-LRR defense gene family via the

860 production of phased, trans-acting siRNAs. *Genes & Development*, 25(23), 2540–2553.

861 <https://doi.org/10.1101/gad.177527.111>

862

863

864

865

866

867

868

869

870

871

872

873

874 **Table S2. *A. thaliana* small RNA libraries used in this study**

| Accession Number | Genotype                           | 3' Adapter (First 8 nts) | Source                       |
|------------------|------------------------------------|--------------------------|------------------------------|
| GSM2825283       | Wild-type Replicate 1              | TGGAATTC                 | (Polydore & Axtell, 2018)    |
| GSM2825284       | Wild-type Replicate 2              | TGGAATTC                 | (Polydore & Axtell, 2018)    |
| GSM2825285       | Wild-type Replicate 3              | TGGAATTC                 | (Polydore & Axtell, 2018)    |
| GSM2825286       | <i>rdr1-1/2-1/6-15</i> Replicate 1 | TGGAATTC                 | (Polydore & Axtell, 2018)    |
| GSM2825287       | <i>rdr1-1/2-1/6-15</i> Replicate 2 | TGGAATTC                 | (Polydore & Axtell, 2018)    |
| GSM2825288       | <i>rdr1-1/2-1/6-15</i> Replicate 3 | TGGAATTC                 | (Polydore & Axtell, 2018)    |
| GSM1533527       | Wild-type Replicate 1              | TGGAATTC                 | (Groth et al., 2014)         |
| GSM1533528       | Wild-type Replicate 2              | TGGAATTC                 | (Groth et al., 2014)         |
| GSM1533529       | Wild-type Replicate 3              | TGGAATTC                 | (Groth et al., 2014)         |
| GSM1533542       | <i>dcl3</i> Replicate 1            | TGGAATTC                 | (Groth et al., 2014)         |
| GSM1533543       | <i>dcl3</i> Replicate 2            | TGGAATTC                 | (Groth et al., 2014)         |
| GSM1533544       | <i>dcl3</i> Replicate 3            | TGGAATTC                 | (Groth et al., 2014)         |
| GSM1845210       | Wild-type Replicate 1              | AGATCGGA                 | (Elvira-Matlot et al., 2016) |
| GSM1845211       | Wild-type Replicate 2              | AGATCGGA                 | (Elvira-Matlot et al., 2016) |
| GSM1845212       | Wild-type Replicate 3              | AGATCGGA                 | (Elvira-Matlot et al., 2016) |
| GSM1845222       | <i>dcl2-1/3-1/4-2t</i> Replicate 1 | AGATCGGA                 | (Elvira-Matlot et al., 2016) |
| GSM1845223       | <i>dcl2-1/3-1/4-2t</i> Replicate 2 | AGATCGGA                 | (Elvira-Matlot et al., 2016) |
| GSM1845224       | <i>dcl2-1/3-1/4-2t</i> Replicate 3 | AGATCGGA                 | (Elvira-Matlot et al., 2016) |
| GSM1087973       | Wild-type Replicate 1              | TCGTATGC                 | (Jeong et al., 2013)         |
| GSM1087974       | Wild-type Replicate 2              | TCGTATGC                 | (Jeong et al., 2013)         |
| GSM1087975       | <i>dcl1-7</i> Replicate 1          | TCGTATGC                 | (Jeong et al., 2013)         |
| GSM1087976       | <i>dcl1-7</i> Replicate 2          | TCGTATGC                 | (Jeong et al., 2013)         |
| GSM1377370       | Wild-type Replicate 1              | TGGAATTC                 | (Li et al., 2014)            |
| GSM1377371       | Wild-type Replicate 2              | TGGAATTC                 | (Li et al., 2014)            |
| GSM1377372       | <i>nrdp1-3</i> Replicate 1         | TGGAATTC                 | (Li et al., 2014)            |
| GSM1377373       | <i>nrdp1-3</i> Replicate 2         | TGGAATTC                 | (Li et al., 2014)            |
| GSM1377376       | <i>rdr2-1</i> Replicate 1          | TGGAATTC                 | (Li et al., 2014)            |

|            |                                   |          |                      |
|------------|-----------------------------------|----------|----------------------|
| GSM1377377 | <i>rdr2-1</i> Replicate 2         | TGGAATTC | (Li et al., 2014)    |
| GSM2102962 | Wild-type Replicate 1             | TGGAATTC | (Panda et al., 2016) |
| GSM2102963 | Wild-type Replicate 2             | TGGAATTC | (Panda et al., 2016) |
| GSM2102965 | <i>rdr6-15</i> Replicate 1        | TGGAATTC | (Panda et al., 2016) |
| GSM2102462 | <i>rdr6-15</i> Replicate 2        | TGGAATTC | (Panda et al., 2016) |
| GSM893112  | Wild-type Replicate 1             | CACTCGGG | (Lee et al., 2012)   |
| GSM893113  | Wild-type Replicate 2             | CACTCGGG | (Lee et al., 2012)   |
| GSM893114  | Wild-type Replicate 3             | CACTCGGG | (Lee et al., 2012)   |
| GSM893115  | <i>nrbp1-1 (nrpe)</i> Replicate 1 | CACTCGGG | (Lee et al., 2012)   |
| GSM893116  | <i>nrbp1-1 (nrpe)</i> Replicate 2 | CACTCGGG | (Lee et al., 2012)   |
| GSM893117  | <i>nrbp1-1 (nrpe)</i> Replicate 3 | CACTCGGG | (Lee et al., 2012)   |
| GSM1668899 | Wild-type Replicate 1             | TGGAATTC | (Zhai et al., 2015)  |
| GSM1668905 | Wild-type Replicate 2             | TGGAATTC | (Zhai et al., 2015)  |

875 **Reference List (Table S2)**

- 876 **Elvira-Matlot, E., Hachet, M., Shamandi, N., Comella, P., Sáez-Vásquez, J., Zytnicki, M.,**  
877 **& Vaucheret, H.** (2016). Arabidopsis RNASE THREE LIKE2 Modulates the Expression  
878 of Protein-Coding Genes via 24-Nucleotide Small Interfering RNA-Directed DNA  
879 Methylation. *The Plant Cell Online*, 28(2), 406–425.  
880 <https://doi.org/10.1105/tpc.15.00540>
- 881 **Groth, M., Stroud, H., Feng, S., Greenberg, M. V. C., Vashisht, A. A., Wohlschlegel, J. A.,**  
882 **& Ausin, I.** (2014). SNF2 chromatin remodeler-family proteins FRG1 and -2 are  
883 required for RNA-directed DNA methylation. *Proceedings of the National Academy of*  
884 *Sciences of the United States of America*, 111(49), 17666–17671.  
885 <https://doi.org/10.1073/pnas.1420515111>
- 886 **Jeong, D.-H., Thatcher, S. R., Brown, R. S. H., Zhai, J., Park, S., Rymarquis, L. A., &**  
887 **Green, P. J.** (2013). Comprehensive Investigation of MicroRNAs Enhanced by Analysis  
888 of Sequence Variants, Expression Patterns, ARGONAUTE Loading, and Target  
889 Cleavage1[W][OA]. *Plant Physiology*, 162(3), 1225–1245.  
890 <https://doi.org/10.1104/pp.113.219873>

- 891 **Lee, T., Gurazada, S. G. R., Zhai, J., Li, S., Simon, S. A., Matzke, M. A., & Meyers, B. C.**  
892 (2012). RNA polymerase V-dependent small RNAs in Arabidopsis originate from small,  
893 intergenic loci including most SINE repeats. *Epigenetics*, 7(7), 781–795.  
894 <https://doi.org/10.4161/epi.20290>
- 895 **Li, S., Vandivier, L. E., Tu, B., Gao, L., Won, S. Y., Li, S., & Chen, X.** (2014). Detection of  
896 Pol IV/RDR2-dependent transcripts at the genomic scale in Arabidopsis reveals features  
897 and regulation of siRNA biogenesis. *Genome Research*, gr.182238.114.  
898 <https://doi.org/10.1101/gr.182238.114>
- 899 **Panda, K., Ji, L., Neumann, D. A., Daron, J., Schmitz, R. J., & Slotkin, R. K.** (2016). Full-  
900 length autonomous transposable elements are preferentially targeted by expression-  
901 dependent forms of RNA-directed DNA methylation. *Genome Biology*, 17, 170.  
902 <https://doi.org/10.1186/s13059-016-1032-y>
- 903 **Polydore, S., & Axtell, M. J.** (2018). Analysis of RDR1/RDR2/RDR6-independent small RNAs  
904 in Arabidopsis thaliana improves MIRNA annotations and reveals unexplained types of  
905 short interfering RNA loci. *The Plant Journal: For Cell and Molecular Biology*, 94(6),  
906 1051–1063. <https://doi.org/10.1111/tpj.13919>
- 907 **Zhai, J., Bischof, S., Wang, H., Feng, S., Lee, T., Teng, C., & Jacobsen, S. E.** (2015). One  
908 precursor One siRNA model for Pol IV- dependent siRNAs Biogenesis. *Cell*, 163(2),  
909 445–455. <https://doi.org/10.1016/j.cell.2015.09.032>
